# Supplementary material for: Global, regional, and national burden of Chronic kidney disease due to type 2 diabetes mellitus, 1990-2021, with forecasts to 2050: a forecasting study for the Global Burden of Disease Study 2021
Source: Research Square preprint supplement (doi:10.21203/rs.3.rs-6789777/v1), 2025-06-10
Supplement: Supplementary file 1 [file 989eba16d1134531bbca720c.docx]

**Table 1: Incidence of Chronic kidney disease due to diabetes mellitus type 2 Between 1990 and 2021 at the Global and Regional Level.**

| **Location** | **1990** | | **2021** | | **Percentage change in number between 1990 and 2021** | **Percentage change in rates between 1990 and 2021** | **EAPC** |
| --- | --- | --- | --- | --- | --- | --- | --- |
| **Number** | **Rates** | **Number** | **Rates** |
| **Prevalence** | | | | | | | |
| **Global** | 753106.40(680930.46,826928.18) | 19.07(17.28,20.83) | 2012024.53(1857800.04,2154287.72) | 23.07(21.40,24.72) | 167.16(153.53,182.63) | 20.97(14.99,27.49) | 0.61(0.60,0.63) |
| **SDI** | | | | | | | |
| **High SDI** | 289954.13(263979.54,316806.57) | 25.59(23.30,27.81) | 595270.86(547942.95,636879.14) | 28.34(26.19,30.30) | 105.30(93.99,117.68) | 10.75(4.83,17.36) | 0.28(0.24,0.33) |
| **High middle SDI** | 156965.51(140078.54,172676.76) | 15.72(14.12,17.28) | 404153.75(369299.53,435463.95) | 20.09(18.43,21.59) | 157.48(142.69,175.18) | 27.83(20.71,36.27) | 0.91(0.88,0.95) |
| **Middle SDI** | 181843.98(161584.47,203076.18) | 17.13(15.38,18.97) | 635310.50(582063.19,685432.59) | 22.95(21.15,24.58) | 249.37(224.15,276.80) | 33.96(25.11,43.94) | 0.99(0.97,1.02) |
| **Low middle SDI** | 96144.69(85819.89,107293.14) | 15.13(13.54,16.71) | 298098.79(270253.90,326985.36) | 20.20(18.31,22.05) | 210.05(195.02,226.94) | 33.57(27.59,40.00) | 0.77(0.70,0.85) |
| **Low SDI** | 27500.19(24485.69,30719.52) | 11.90(10.68,13.16) | 77297.98(69537.24,84888.84) | 15.09(13.65,16.60) | 181.08(165.79,198.45) | 26.76(20.00,34.42) | 0.65(0.56,0.74) |
| **Regions** | | | | | | | |
| **Andean Latin America** | 3348.62(2929.90,3785.80) | 16.41(14.40,18.50) | 18007.81(16150.50,20130.55) | 30.50(27.39,34.10) | 437.77(393.34,489.42) | 85.88(70.26,103.58) | 2.31(2.20,2.41) |
| **Australasia** | 6562.47(5920.18,7295.09) | 26.65(24.07,29.55) | 16772.42(14864.10,18754.04) | 30.30(26.99,33.93) | 155.58(132.86,175.04) | 13.72(4.67,22.17) | 0.42(0.37,0.47) |
| **Caribbean** | 4414.49(3972.44,4917.06) | 16.71(14.99,18.62) | 14678.65(13310.45,16052.19) | 27.20(24.68,29.76) | 232.51(209.48,257.51) | 62.77(51.62,74.99) | 1.70(1.60,1.80) |
| **Central Asia** | 4556.54(3956.29,5216.72) | 9.24(8.07,10.55) | 14528.26(12630.78,16383.67) | 16.37(14.60,18.22) | 218.84(199.58,240.90) | 77.14(67.20,88.55) | 2.02(1.86,2.17) |
| **Central Europe** | 20175.17(17840.53,22635.13) | 13.15(11.67,14.66) | 49402.79(44902.95,54054.33) | 22.11(20.24,23.92) | 144.87(126.89,167.03) | 68.19(57.49,81.18) | 1.54(1.40,1.67) |
| **Central Latin America** | 24703.60(22032.26,27768.73) | 28.46(25.42,31.90) | 106519.01(98854.93,114268.00) | 41.31(38.40,44.26) | 331.19(292.77,374.92) | 45.13(32.75,59.53) | 1.32(1.26,1.39) |
| **Central Sub-Saharan Africa** | 2078.86(1787.22,2378.99) | 9.22(8.13,10.39) | 6880.60(5958.07,7821.24) | 12.58(11.11,14.18) | 230.98(206.09,257.98) | 36.37(26.62,47.34) | 0.94(0.77,1.12) |
| **East Asia** | 134292.51(119023.01,150087.85) | 15.32(13.67,16.99) | 373610.92(340685.92,402345.45) | 16.59(15.26,17.82) | 178.21(155.85,205.14) | 8.29(0.50,17.94) | 0.42(0.35,0.50) |
| **Eastern Europe** | 24272.31(21290.30,27560.33) | 8.65(7.70,9.73) | 52339.23(47044.28,58222.31) | 15.29(13.81,16.81) | 115.63(100.93,130.34) | 76.72(65.88,86.34) | 1.89(1.82,1.97) |
| **Eastern Sub-Saharan Africa** | 6723.73(6005.47,7549.74) | 9.13(8.20,10.08) | 18825.31(16932.81,20749.97) | 11.41(10.30,12.55) | 179.98(162.68,199.75) | 24.99(17.16,33.72) | 0.59(0.44,0.73) |
| **High-income Asia Pacific** | 59317.27(53817.71,64923.48) | 28.98(26.31,31.63) | 133311.69(121632.43,145016.08) | 29.32(26.88,31.66) | 124.74(110.88,139.35) | 1.18(-3.23,6.71) | 0.07(0.02,0.12) |
| **High-income North America** | 107854.91(96877.08,119411.37) | 30.01(26.91,33.08) | 216863.66(198070.32,236861.46) | 32.38(29.68,35.16) | 101.07(87.76,116.99) | 7.91(0.60,16.50) | 0.16(0.08,0.24) |
| **North Africa and Middle East** | 44918.68(40072.49,50061.83) | 26.20(23.49,28.80) | 199623.39(182526.91,218247.29) | 42.80(39.23,46.54) | 344.41(318.37,374.39) | 63.38(54.48,74.02) | 1.54(1.46,1.62) |
| **Oceania** | 382.25(331.52,435.18) | 12.09(10.63,13.61) | 1223.46(1066.46,1377.47) | 15.47(13.75,17.19) | 220.07(191.37,249.05) | 27.92(16.64,39.16) | 0.75(0.68,0.82) |
| **South Asia** | 89412.91(79455.56,99864.97) | 14.59(13.09,16.14) | 267934.35(239653.87,294287.88) | 17.63(15.82,19.36) | 199.66(182.57,219.55) | 20.85(14.72,27.27) | 0.36(0.26,0.45) |
| **Southeast Asia** | 38934.01(34827.74,43212.95) | 14.85(13.31,16.45) | 152649.90(138455.49,167650.14) | 22.31(20.28,24.32) | 292.07(266.69,320.56) | 50.29(40.51,61.07) | 1.30(1.25,1.35) |
| **Southern Latin America** | 10244.46(8983.14,11758.73) | 21.98(19.30,25.16) | 25927.73(23175.93,28694.40) | 29.23(26.16,32.33) | 153.09(127.34,181.97) | 33.01(20.07,47.68) | 1.09(0.97,1.21) |
| **Southern Sub-Saharan Africa** | 4522.17(4050.37,5055.57) | 16.59(14.92,18.44) | 13773.65(12470.46,15069.89) | 23.37(21.14,25.51) | 204.58(188.35,222.33) | 40.89(33.79,48.75) | 1.01(0.86,1.17) |
| **Tropical Latin America** | 18123.40(16212.08,20221.91) | 19.22(17.20,21.41) | 66482.96(60784.18,72038.98) | 25.53(23.34,27.59) | 266.83(239.14,304.88) | 32.82(23.08,45.43) | 0.87(0.81,0.92) |
| **Western Europe** | 136706.17(123437.37,150729.97) | 22.52(20.39,24.69) | 228491.55(212548.16,245901.50) | 23.91(22.18,25.74) | 67.14(56.00,78.75) | 6.21(-0.55,13.66) | 0.23(0.18,0.28) |
| **Western Sub-Saharan Africa** | 11561.88(10322.55,12856.89) | 13.02(11.70,14.40) | 34177.18(30688.34,37596.62) | 17.29(15.60,19.04) | 195.60(180.46,212.68) | 32.80(25.71,40.22) | 0.89(0.77,1.01) |
