# Supplementary material for: Global, regional, and national burden of Chronic kidney disease due to type 2 diabetes mellitus, 1990-2021, with forecasts to 2050: a forecasting study for the Global Burden of Disease Study 2021
Source: Research Square preprint supplement (doi:10.21203/rs.3.rs-6789777/v1), 2025-06-10
Supplement: Supplementary file 2 [file cc3d4501ea7d19a584060cc7.docx]

**Table S1:Prevalence of Chronic kidney disease due to diabetes mellitus type 2 Between 1990 and 2021 at the Global and Regional Level.**

| **Location** | **1990** | | **2021** | | **Percentage change in number between 1990 and 2021** | **Percentage change in ASR between 1990 and 2021** | **EAPC** |
| --- | --- | --- | --- | --- | --- | --- | --- |
| **Number** | **ASR** | **Number** | **ASR** |
| **Prevalence** | | | | | | | |
| **Global** | 58105267.81(53056991.55,63286818.26) | 1327.22(1223.26,1439.42) | 107559954.75(99170797.20,115994731.66) | 1259.63(1161.99,1359.92) | 85.11(78.13,91.41) | -5.09(-7.46,-2.98) | -0.17(-0.20,-0.13) |
| **SDI** | | | | | | | |
| **High SDI** | 11068894.85(10251403.23,11847690.47) | 1037.34(959.27,1110.52) | 18097945.86(16763917.42,19359375.75) | 997.07(918.70,1066.28) | 63.50(59.59,67.22) | -3.88(-5.62,-2.23) | -0.09(-0.14,-0.05) |
| **High middle SDI** | 13233846.94(12089211.82,14479467.96) | 1271.32(1167.77,1384.68) | 21060240.69(19314069.10,22837224.84) | 1157.00(1062.14,1253.04) | 59.14(51.57,65.58) | -8.99(-11.95,-6.58) | -0.25(-0.32,-0.19) |
| **Middle SDI** | 17975997.66(16224750.60,19689647.37) | 1431.89(1315.46,1554.26) | 36412910.66(33598848.03,39348242.63) | 1331.60(1232.11,1433.53) | 102.56(92.59,111.87) | -7.00(-9.53,-4.81) | -0.20(-0.25,-0.16) |
| **Low middle SDI** | 11948109.52(10785488.30,13071617.80) | 1586.44(1452.35,1722.23) | 23752428.05(21773064.59,25995903.50) | 1474.59(1357.94,1606.52) | 98.80(91.34,105.59) | -7.05(-9.36,-4.89) | -0.31(-0.36,-0.27) |
| **Low SDI** | 3827765.69(3462236.79,4236704.88) | 1355.23(1238.78,1484.31) | 8155173.70(7427182.96,9026802.92) | 1269.37(1167.02,1378.81) | 113.05(106.34,119.42) | -6.34(-8.66,-4.41) | -0.28(-0.32,-0.25) |
| **Regions** | | | | | | | |
| **Andean Latin America** | 244090.89(215794.46,276279.01) | 983.26(882.52,1092.28) | 597138.74(538460.74,662178.58) | 957.16(862.93,1056.15) | 144.64(133.90,156.14) | -2.65(-5.80,0.29) | -0.06(-0.10,-0.03) |
| **Australasia** | 193266.57(174191.39,211085.68) | 827.63(744.93,908.08) | 378015.06(344562.49,414093.55) | 768.63(694.98,843.15) | 95.59(85.13,104.22) | -2.65(-5.80,0.29) | -0.20(-0.27,-0.13) |
| **Caribbean** | 318975.87(288670.63,353373.57) | 1115.04(1013.04,1223.76) | 563202.59(515384.13,614522.44) | 1069.87(978.55,1169.72) | 76.57(69.12,84.38) | -2.65(-5.80,0.29) | -0.15(-0.17,-0.13) |
| **Central Asia** | 806013.91(735985.09,881356.36) | 1563.79(1441.41,1698.32) | 1315604.47(1205400.19,1431740.62) | 1493.98(1381.44,1617.53) | 63.22(55.87,69.68) | -2.65(-5.80,0.29) | -0.16(-0.18,-0.15) |
| **Central Europe** | 1359624.93(1251502.37,1475287.61) | 938.65(865.79,1016.66) | 1685179.93(1564182.82,1814448.68) | 855.75(792.62,922.18) | 23.94(19.32,27.78) | -2.65(-5.80,0.29) | -0.38(-0.41,-0.36) |
| **Central Latin America** | 1429952.36(1296461.32,1574605.77) | 1408.19(1294.38,1525.56) | 3407649.36(3135739.85,3667865.03) | 1327.57(1225.04,1427.15) | 138.31(127.10,149.74) | -2.65(-5.80,0.29) | -0.18(-0.20,-0.15) |
| **Central Sub-Saharan Africa** | 421276.53(371461.00,475086.07) | 1480.03(1343.41,1620.91) | 976815.05(874265.67,1085754.07) | 1377.49(1262.91,1506.70) | 131.87(122.66,140.46) | -2.65(-5.80,0.29) | -0.32(-0.34,-0.29) |
| **East Asia** | 12310493.26(11172805.60,13525325.19) | 1213.40(1107.78,1317.90) | 21662039.14(19882229.64,23414195.37) | 1054.10(972.27,1140.11) | 75.96(66.54,85.04) | -2.65(-5.80,0.29) | -0.25(-0.39,-0.10) |
| **Eastern Europe** | 4067468.70(3722843.40,4450527.24) | 1537.86(1409.57,1677.58) | 4315524.27(3951875.47,4696855.25) | 1390.26(1277.42,1520.38) | 6.10(1.28,9.91) | -2.65(-5.80,0.29) | -0.38(-0.40,-0.36) |
| **Eastern Sub-Saharan Africa** | 942946.76(844298.96,1045472.77) | 952.85(866.99,1041.33) | 2183334.24(1987627.83,2407173.75) | 942.79(861.60,1032.88) | 131.54(120.29,141.29) | -2.65(-5.80,0.29) | -0.05(-0.07,-0.03) |
| **High-income Asia Pacific** | 2905294.35(2658368.51,3157585.34) | 1446.13(1324.25,1571.58) | 4607840.50(4243578.18,4946981.83) | 1275.44(1168.23,1377.36) | 58.60(52.74,64.43) | -2.65(-5.80,0.29) | -0.47(-0.54,-0.41) |
| **High-income North America** | 3432140.75(3185380.49,3678786.68) | 1006.79(934.20,1082.15) | 6203134.33(5758563.33,6652331.58) | 1056.52(979.59,1135.34) | 80.74(77.23,84.25) | -2.65(-5.80,0.29) | 0.35(0.29,0.42) |
| **North Africa and Middle East** | 3300457.40(2973589.62,3643974.15) | 1569.05(1421.63,1723.90) | 8039618.35(7267275.57,8805017.85) | 1505.85(1368.99,1642.89) | 143.59(134.26,153.73) | -2.65(-5.80,0.29) | -0.15(-0.17,-0.14) |
| **Oceania** | 55402.81(47748.14,61985.82) | 1396.98(1240.14,1537.70) | 127251.73(111037.31,142276.65) | 1337.24(1193.94,1478.48) | 129.68(119.44,140.62) | -2.65(-5.80,0.29) | -0.15(-0.16,-0.13) |
| **South Asia** | 12503453.79(11237789.14,13777983.47) | 1712.63(1562.29,1863.11) | 25462948.62(23248463.85,27987293.91) | 1547.31(1418.44,1687.60) | 103.65(95.77,111.73) | -2.65(-5.80,0.29) | -0.44(-0.52,-0.36) |
| **Southeast Asia** | 5753417.41(5149626.30,6345740.88) | 1793.60(1626.27,1951.45) | 12333536.20(11263092.29,13439668.84) | 1739.34(1595.66,1883.88) | 114.37(103.86,124.23) | -2.65(-5.80,0.29) | -0.18(-0.23,-0.13) |
| **Southern Latin America** | 413283.79(371174.54,461922.50) | 885.38(796.36,987.75) | 753904.90(680382.91,837547.87) | 911.84(819.79,1021.13) | 82.42(75.12,88.92) | -2.65(-5.80,0.29) | 0.13(0.11,0.15) |
| **Southern Sub-Saharan Africa** | 461702.64(421236.47,508339.44) | 1418.23(1302.09,1533.13) | 890370.93(815493.63,968328.50) | 1362.72(1254.88,1470.95) | 92.85(85.40,99.82) | -2.65(-5.80,0.29) | -0.17(-0.19,-0.16) |
| **Tropical Latin America** | 1356932.64(1224045.09,1486783.95) | 1266.40(1153.22,1371.28) | 2960767.46(2714465.14,3207228.64) | 1145.84(1053.26,1238.67) | 118.20(108.76,127.18) | -2.65(-5.80,0.29) | -0.36(-0.38,-0.35) |
| **Western Europe** | 4413773.99(4054375.78,4720538.17) | 826.01(762.09,883.39) | 5879101.21(5438217.17,6289341.38) | 737.42(683.02,790.09) | 33.20(28.40,37.33) | -2.65(-5.80,0.29) | -0.41(-0.47,-0.35) |
| **Western Sub-Saharan Africa** | 1415298.45(1293966.38,1541607.42) | 1328.43(1227.41,1428.43) | 3216977.65(2963597.80,3492631.23) | 1276.31(1183.60,1373.75) | 127.30(120.47,134.01) | -2.65(-5.80,0.29) | -0.11(-0.12,-0.10) |

**Table S2: Mortality of Chronic kidney disease due to diabetes mellitus type 2 Between 1990 and 2021 at the Global and Regional Level.**

| **Location** | **1990** | | **2021** | | **Percentage change in number between 1990 and 2021** | **Percentage change in ASR between 1990 and 2021** | **EAPC** |
| --- | --- | --- | --- | --- | --- | --- | --- |
| **Number** | **ASR** | **Number** | **ASR** |
| **Prevalence** | | | | | | | |
| **Global** | 147970.49(124179.45,176412.77) | 4.15(3.50,4.94) | 477273.11(401541.09,565951.02) | 5.72(4.83,6.79) | 222.55(177.43,253.83) | 37.79(19.17,49.63) | 1.17(1.10,1.24) |
| **SDI** | | | | | | | |
| **High SDI** | 26431.34(21843.30,31511.25) | 2.36(1.95,2.84) | 111564.67(93260.15,132403.93) | 4.62(3.92,5.40) | 322.09(275.84,369.99) | 95.35(79.50,113.48) | 2.51(2.37,2.66) |
| **High middle SDI** | 26410.09(21805.18,32380.36) | 3.01(2.48,3.66) | 71227.09(57909.27,86608.79) | 3.65(2.96,4.43) | 169.70(120.17,213.53) | 21.54(0.64,39.87) | 0.73(0.57,0.89) |
| **Middle SDI** | 56152.24(47412.02,66285.51) | 6.77(5.73,7.95) | 182159.53(151834.67,216847.23) | 7.51(6.21,8.97) | 224.40(164.58,265.78) | 10.99(-9.44,23.65) | 0.44(0.37,0.52) |
| **Low middle SDI** | 25469.17(20399.42,32174.17) | 4.90(3.97,6.04) | 82399.09(66442.89,102844.29) | 6.43(5.20,7.98) | 223.52(160.07,275.36) | 31.24(4.75,51.55) | 0.89(0.84,0.94) |
| **Low SDI** | 13361.53(10622.47,16840.42) | 7.16(5.80,8.95) | 29491.27(23284.44,37040.83) | 7.36(5.88,9.30) | 120.72(93.16,151.04) | 2.76(-10.13,15.91) | 0.02(-0.11,0.15) |
| **Regions** | | | | | | | |
| **Andean Latin America** | 1877.09(1542.35,2302.49) | 10.41(8.55,12.77) | 8378.10(6459.82,10828.79) | 14.86(11.47,19.21) | 346.33(259.23,452.57) | 42.78(15.10,76.45) | 1.16(0.84,1.49) |
| **Australasia** | 110.25(88.01,140.82) | 0.51(0.40,0.66) | 506.14(367.10,689.53) | 0.82(0.60,1.10) | 359.07(299.95,429.08) | 62.53(42.29,85.17) | 2.43(1.91,2.96) |
| **Caribbean** | 1909.84(1647.40,2224.75) | 7.96(6.89,9.30) | 6205.04(5201.20,7490.72) | 11.38(9.54,13.73) | 224.90(180.65,269.33) | 43.00(23.96,61.84) | 1.63(1.46,1.80) |
| **Central Asia** | 284.90(207.60,381.94) | 0.63(0.46,0.86) | 1288.99(978.57,1669.62) | 1.76(1.35,2.30) | 352.44(267.84,449.10) | 177.86(122.15,241.35) | 2.95(2.46,3.44) |
| **Central Europe** | 1524.54(1147.30,1981.46) | 1.09(0.83,1.38) | 2761.14(2138.60,3486.87) | 1.15(0.89,1.43) | 81.11(59.84,106.16) | 5.44(-4.84,16.65) | 0.19(-0.06,0.45) |
| **Central Latin America** | 4666.12(3729.22,5691.54) | 6.72(5.45,8.23) | 24359.41(19319.26,30465.42) | 10.07(7.99,12.55) | 422.05(377.07,471.82) | 49.89(36.98,64.62) | 1.82(1.31,2.33) |
| **Central Sub-Saharan Africa** | 1415.55(1034.59,1913.23) | 8.60(6.46,11.44) | 3564.15(2464.60,4978.12) | 9.01(6.15,12.90) | 151.79(87.77,236.65) | 4.75(-22.45,36.50) | 0.02(-0.08,0.11) |
| **East Asia** | 46087.23(38276.09,55778.28) | 6.99(5.89,8.45) | 115063.68(91638.29,141544.92) | 5.83(4.67,7.16) | 149.66(94.48,209.39) | -16.63(-35.65,1.49) | -0.53(-0.63,-0.44) |
| **Eastern Europe** | 855.11(633.71,1122.88) | 0.32(0.24,0.41) | 2797.56(2151.71,3595.86) | 0.77(0.59,0.98) | 227.16(186.72,268.58) | 142.66(115.19,168.52) | 2.97(2.49,3.44) |
| **Eastern Sub-Saharan Africa** | 7632.40(6072.91,9520.73) | 12.63(10.35,15.64) | 15078.52(12109.08,18892.20) | 12.01(9.71,15.00) | 97.56(72.18,127.43) | -4.86(-18.50,9.47) | -0.36(-0.44,-0.28) |
| **High-income Asia Pacific** | 7826.25(6402.57,9348.97) | 4.41(3.60,5.31) | 23596.78(17306.58,30380.05) | 3.60(2.78,4.49) | 201.51(152.49,246.16) | -18.27(-25.22,-12.97) | -0.57(-0.69,-0.44) |
| **High-income North America** | 8210.70(6534.37,10182.32) | 2.25(1.79,2.75) | 57161.46(49314.03,64516.71) | 8.08(7.03,9.12) | 596.18(499.10,709.23) | 259.94(210.76,316.32) | 4.71(4.45,4.98) |
| **North Africa and Middle East** | 8680.08(6223.52,12598.05) | 6.35(4.56,9.38) | 30956.21(23711.05,39766.74) | 8.19(6.32,10.50) | 256.64(128.60,345.52) | 28.92(-18.22,60.82) | 1.04(0.91,1.17) |
| **Oceania** | 235.91(167.54,332.39) | 10.71(7.88,14.80) | 795.86(636.24,1004.04) | 13.63(11.18,17.28) | 237.35(133.83,387.56) | 27.25(-10.18,80.53) | 0.69(0.58,0.81) |
| **South Asia** | 20172.69(16008.74,25206.98) | 4.10(3.29,5.06) | 70319.91(54707.05,89923.68) | 5.26(4.14,6.62) | 248.59(170.89,322.32) | 28.48(-0.67,55.47) | 0.72(0.61,0.84) |
| **Southeast Asia** | 16900.53(13939.31,20577.47) | 7.88(6.57,9.47) | 58970.38(48619.18,70561.13) | 10.35(8.57,12.53) | 248.93(181.28,304.67) | 31.45(5.56,52.14) | 0.90(0.86,0.94) |
| **Southern Latin America** | 2267.54(1779.36,2809.69) | 5.18(4.11,6.37) | 4602.84(3602.88,5792.17) | 5.04(3.94,6.31) | 102.99(82.92,124.06) | -2.82(-10.49,4.94) | 0.16(-0.18,0.49) |
| **Southern Sub-Saharan Africa** | 656.81(478.27,918.63) | 2.92(2.17,4.06) | 2069.04(1552.74,2770.06) | 4.35(3.31,5.83) | 215.01(134.93,268.43) | 49.26(10.30,73.76) | 1.89(1.55,2.24) |
| **Tropical Latin America** | 4759.78(4024.81,5570.63) | 6.20(5.26,7.31) | 17882.59(15002.16,21195.17) | 7.22(6.01,8.58) | 275.70(249.38,300.21) | 16.41(10.22,21.50) | 0.61(0.43,0.78) |
| **Western Europe** | 8457.07(6439.18,11131.09) | 1.38(1.06,1.78) | 22783.89(16631.56,30904.03) | 1.81(1.35,2.39) | 169.41(126.30,213.63) | 30.60(16.14,44.33) | 1.34(1.09,1.59) |
| **Western Sub-Saharan Africa** | 3440.11(2529.85,4488.68) | 4.92(3.74,6.50) | 8131.43(6057.58,10852.12) | 5.48(4.08,7.52) | 136.37(98.43,176.95) | 11.41(-7.25,29.31) | 0.15(0.05,0.26) |

**Table S3: DALYs of Chronic kidney disease due to diabetes mellitus type 2 Between 1990 and 2021 at the Global and Regional Level.**

| **Location** | **1990** | | **2021** | | **Percentage change in number between 1990 and 2021** | **Percentage change in ASR between 1990 and 2021** | **EAPC** |
| --- | --- | --- | --- | --- | --- | --- | --- |
| **Number** | **ASR** | **Number** | **ASR** |
| **Prevalence** | | | | | | | |
| **Global** | 4122918.88(3498979.56,4818958.01) | 105.71(90.68,122.67) | 11278934.98(9682785.19,13103870.81) | 131.08(112.75,152.49) | 173.57(140.54,194.35) | 24.00(9.26,33.00) | 0.81(0.74,0.87) |
| **SDI** | | | | | | | |
| **High SDI** | 692417.62(588252.12,796293.86) | 62.47(53.01,71.88) | 2202413.38(1928997.73,2486233.18) | 102.65(90.04,114.51) | 218.08(194.09,242.35) | 64.31(53.89,74.81) | 1.90(1.78,2.02) |
| **High middle SDI** | 757547.15(633490.17,918717.20) | 78.21(65.53,93.87) | 1678678.75(1404999.25,2018747.12) | 84.71(71.10,102.20) | 121.59(88.10,149.46) | 8.31(-7.26,21.94) | 0.37(0.23,0.52) |
| **Middle SDI** | 1561396.56(1328369.69,1842152.16) | 157.87(136.06,183.14) | 4424358.55(3759638.06,5160625.69) | 167.06(141.25,193.92) | 183.36(140.68,215.15) | 5.82(-10.75,16.44) | 0.29(0.22,0.37) |
| **Low middle SDI** | 747141.67(612241.98,907223.63) | 125.03(102.51,150.97) | 2202183.64(1821393.43,2694852.31) | 155.33(128.61,189.41) | 194.75(145.31,235.42) | 24.24(3.35,40.98) | 0.71(0.68,0.74) |
| **Low SDI** | 360510.10(290075.94,441002.00) | 166.43(136.80,206.65) | 761198.24(622327.62,942049.46) | 160.88(131.69,199.61) | 111.14(89.26,137.06) | -3.33(-13.70,8.02) | -0.21(-0.31,-0.12) |
| **Regions** | | | | | | | |
| **Andean Latin America** | 40681.65(33600.83,49808.79) | 209.72(173.88,256.43) | 165500.12(127469.30,211085.29) | 286.11(220.70,365.13) | 306.82(231.17,404.86) | 36.43(11.57,68.69) | 1.00(0.70,1.29) |
| **Australasia** | 4226.36(3251.92,5297.08) | 18.29(14.10,22.83) | 12981.26(10124.45,16242.47) | 23.59(18.26,29.49) | 207.15(173.46,245.38) | 28.99(15.63,44.86) | 1.13(0.84,1.42) |
| **Caribbean** | 44135.05(38001.81,51670.65) | 173.44(149.20,202.43) | 131435.49(108776.60,159205.23) | 242.94(200.84,294.49) | 197.80(158.11,236.62) | 40.07(21.45,58.96) | 1.52(1.38,1.66) |
| **Central Asia** | 20629.54(15762.01,26174.18) | 44.14(33.61,56.32) | 54913.90(43760.11,67787.03) | 67.50(54.05,82.91) | 166.19(137.06,199.46) | 52.93(35.57,72.46) | 1.23(0.98,1.49) |
| **Central Europe** | 50465.62(40365.50,61896.86) | 34.13(27.59,41.41) | 75975.34(62114.31,92514.60) | 33.45(27.34,40.59) | 50.55(37.90,64.93) | -1.98(-9.04,5.60) | 0.00(-0.13,0.13) |
| **Central Latin America** | 116222.57(95344.10,138789.53) | 148.56(122.82,177.30) | 582669.31(462738.25,718465.82) | 232.62(185.51,287.07) | 401.34(353.03,452.16) | 56.58(41.80,71.96) | 1.86(1.35,2.37) |
| **Central Sub-Saharan Africa** | 39338.35(30024.47,52129.51) | 191.57(149.59,249.89) | 97641.61(69611.51,134131.48) | 196.10(139.89,268.68) | 148.21(90.65,221.30) | 2.36(-20.62,31.28) | -0.06(-0.14,0.02) |
| **East Asia** | 1297561.93(1083635.27,1565643.13) | 158.73(134.28,190.51) | 2697277.76(2197710.82,3240412.23) | 125.58(103.38,149.73) | 107.87(68.86,149.50) | -20.88(-35.56,-5.89) | -0.65(-0.76,-0.55) |
| **Eastern Europe** | 58585.59(44677.40,73985.11) | 21.23(16.22,26.99) | 95787.96(76259.37,118768.32) | 26.69(21.37,32.96) | 63.50(46.80,84.55) | 25.71(13.43,40.02) | 0.61(0.48,0.74) |
| **Eastern Sub-Saharan Africa** | 187223.48(149260.41,231084.21) | 266.27(218.26,329.01) | 344089.20(277382.93,431589.07) | 230.39(187.10,284.80) | 83.79(62.47,110.83) | -13.48(-23.93,-1.35) | -0.69(-0.78,-0.61) |
| **High-income Asia Pacific** | 179904.41(155129.78,203823.14) | 92.69(79.56,106.11) | 394459.45(318657.43,468493.21) | 75.19(62.19,87.21) | 119.26(95.71,140.73) | -18.89(-23.16,-15.14) | -0.49(-0.63,-0.36) |
| **High-income North America** | 226907.75(189606.84,263884.55) | 64.85(54.24,75.07) | 1153655.97(1037947.23,1260922.92) | 174.04(156.99,190.94) | 408.43(357.41,469.54) | 168.37(142.94,199.88) | 3.66(3.43,3.89) |
| **North Africa and Middle East** | 222335.55(164571.29,310663.15) | 139.13(103.82,194.31) | 739708.26(577376.48,932697.85) | 170.16(133.86,214.52) | 232.70(122.88,306.58) | 22.30(-18.80,49.39) | 0.82(0.75,0.90) |
| **Oceania** | 7103.57(5245.06,9651.53) | 250.33(187.57,338.97) | 22599.35(18308.48,27917.88) | 309.80(257.33,383.94) | 218.14(131.27,346.00) | 23.76(-10.43,71.15) | 0.63(0.52,0.74) |
| **South Asia** | 626651.91(511743.16,757953.04) | 110.09(90.01,132.44) | 1976809.00(1609612.18,2453203.08) | 134.39(110.52,165.98) | 215.46(158.16,271.25) | 22.08(-0.59,43.66) | 0.60(0.54,0.66) |
| **Southeast Asia** | 481346.74(398120.90,584068.98) | 192.49(161.61,232.46) | 1535393.09(1287456.29,1818898.25) | 237.68(199.78,276.13) | 218.98(167.65,265.00) | 23.47(2.88,40.46) | 0.72(0.69,0.75) |
| **Southern Latin America** | 49714.99(39960.97,60900.33) | 108.59(88.05,132.60) | 88523.49(71127.94,108330.92) | 99.58(80.22,121.62) | 78.06(65.24,91.58) | -8.30(-13.88,-2.28) | -0.06(-0.35,0.23) |
| **Southern Sub-Saharan Africa** | 20614.96(16134.58,26835.55) | 79.52(63.25,102.70) | 60270.14(47470.23,78172.46) | 108.87(85.53,140.03) | 192.36(139.78,231.01) | 36.90(11.29,54.96) | 1.40(1.13,1.66) |
| **Tropical Latin America** | 125595.09(106140.12,145988.58) | 143.57(121.45,165.42) | 397813.63(335704.85,457742.60) | 155.86(131.48,178.87) | 216.74(200.77,233.93) | 8.56(3.61,12.97) | 0.27(0.09,0.45) |
| **Western Europe** | 229589.44(182655.11,279252.41) | 38.70(31.25,46.94) | 428631.78(343313.69,532188.05) | 40.86(32.86,49.70) | 86.69(67.73,105.18) | 5.57(-1.35,12.71) | 0.38(0.26,0.50) |
| **Western Sub-Saharan Africa** | 94084.32(71998.48,120230.92) | 115.50(90.43,146.37) | 222798.85(174986.86,283096.45) | 124.26(97.46,159.87) | 136.81(107.24,169.62) | 7.59(-6.47,22.56) | 0.10(0.02,0.17) |

**Table S4: Prevalence of Chronic kidney disease due to diabetes mellitus type 2 Between 1990 and 2021 at 204 Countries and Territories.**

| **Location** | **1990** | | **2021** | | **Percentage change in number between 1990 and 2021** | **Percentage change in ASR between 1990 and 2021** | **EAPC** |
| --- | --- | --- | --- | --- | --- | --- | --- |
| **Number** | **ASR** | **Number** | **ASR** |
| Afghanistan | 106060.13(92495.07,120612.46) | 1527.26(1336.60,1741.08) | 214600.61(183937.84,251640.49) | 1462.58(1289.83,1673.58) | 102.34(88.29,115.95) | -4.23(-7.63,-1.37) | -0.17(-0.19,-0.15) |
| Albania | 22625.75(19721.07,25915.38) | 946.12(832.47,1064.77) | 34277.73(30597.38,38221.97) | 860.61(762.91,967.87) | 51.50(38.05,64.59) | -9.04(-13.68,-5.06) | -0.32(-0.34,-0.30) |
| Algeria | 242409.58(206940.31,282845.24) | 1571.96(1368.63,1786.42) | 588744.67(510342.42,683236.74) | 1460.31(1277.31,1669.32) | 142.87(128.73,158.69) | -7.10(-10.18,-3.78) | -0.34(-0.37,-0.30) |
| American Samoa | 500.43(424.76,588.47) | 1619.74(1418.16,1847.34) | 765.65(680.21,865.26) | 1548.45(1376.28,1745.57) | 53.00(40.77,66.29) | -4.40(-7.97,-0.83) | -0.17(-0.18,-0.16) |
| Andorra | 532.16(471.72,597.85) | 877.76(778.30,981.51) | 1119.02(990.91,1245.22) | 793.41(701.75,885.03) | 110.28(96.66,123.14) | -9.61(-13.83,-5.75) | -0.35(-0.38,-0.32) |
| Angola | 75844.40(65278.19,88276.32) | 1462.14(1295.70,1644.01) | 212646.08(184953.29,245635.83) | 1364.72(1204.62,1528.33) | 180.37(168.23,191.55) | -6.66(-9.66,-3.60) | -0.26(-0.28,-0.24) |
| Antigua and Barbuda | 604.45(523.60,680.60) | 1109.82(964.40,1252.91) | 1184.44(1038.79,1337.67) | 1097.83(967.51,1235.89) | 95.95(86.31,105.51) | -1.08(-4.34,1.91) | -0.06(-0.07,-0.04) |
| Argentina | 268632.71(236956.43,303878.62) | 837.17(737.74,948.96) | 481397.92(423883.60,547350.00) | 897.55(786.43,1023.94) | 79.20(71.02,87.89) | 7.21(2.20,12.39) | 0.29(0.25,0.33) |
| Armenia | 45864.43(40691.18,52572.48) | 1554.46(1387.33,1752.39) | 58885.71(53199.04,65281.67) | 1447.73(1303.86,1610.26) | 28.39(19.99,37.05) | -6.87(-10.91,-2.70) | -0.29(-0.32,-0.26) |
| Australia | 158985.56(142279.91,176264.54) | 815.65(727.37,906.37) | 312047.80(281620.84,344763.47) | 749.65(672.16,829.52) | 96.27(83.88,106.07) | -8.09(-13.99,-3.96) | -0.23(-0.30,-0.16) |
| Austria | 89410.32(79677.34,99742.50) | 813.70(722.32,916.08) | 123311.58(111328.21,136850.21) | 772.27(692.94,863.75) | 37.92(29.69,45.81) | -5.09(-11.58,0.50) | -0.16(-0.18,-0.13) |
| Azerbaijan | 85044.92(74641.88,96918.64) | 1532.98(1367.22,1729.86) | 161987.53(143523.42,183902.00) | 1479.00(1323.28,1670.53) | 90.47(80.79,100.86) | -3.52(-7.13,0.52) | -0.15(-0.17,-0.14) |
| Bahamas | 2113.98(1802.87,2461.11) | 1107.53(965.44,1253.22) | 4594.81(4001.06,5172.34) | 1081.37(948.00,1219.40) | 117.35(103.43,132.30) | -2.36(-5.55,0.80) | -0.09(-0.10,-0.08) |
| Bahrain | 5588.27(4583.40,6718.48) | 1644.64(1432.46,1853.23) | 22073.47(18890.38,25320.86) | 1550.82(1357.11,1743.69) | 295.00(260.81,333.49) | -5.70(-8.59,-2.61) | -0.23(-0.24,-0.21) |
| Bangladesh | 887497.59(756971.21,1033070.11) | 1427.82(1254.76,1607.64) | 2044420.88(1783301.49,2320117.75) | 1363.34(1195.84,1539.45) | 130.36(115.98,146.33) | -4.52(-8.23,-1.28) | -0.25(-0.31,-0.20) |
| Barbados | 2961.97(2641.62,3350.30) | 1070.41(954.61,1211.74) | 4831.50(4324.27,5401.45) | 1061.62(945.01,1197.30) | 63.12(55.69,71.51) | -0.82(-3.91,2.70) | -0.05(-0.07,-0.03) |
| Belarus | 193028.21(169461.13,219717.53) | 1582.47(1383.11,1812.72) | 204587.52(181794.67,229297.97) | 1437.81(1265.20,1616.98) | 5.99(0.04,11.54) | -9.14(-14.44,-4.67) | -0.40(-0.43,-0.38) |
| Belgium | 124797.03(110837.04,137751.17) | 882.46(776.70,987.39) | 163816.72(147074.71,181563.85) | 827.75(738.80,930.03) | 31.27(24.53,38.50) | -6.20(-10.91,-1.78) | -0.18(-0.20,-0.16) |
| Belize | 1199.06(1032.45,1380.66) | 1100.16(963.91,1241.78) | 3782.71(3310.96,4314.48) | 1099.54(966.06,1238.32) | 215.47(201.22,232.50) | -0.06(-3.80,3.93) | -0.03(-0.04,-0.02) |
| Benin | 30425.30(26125.41,35345.82) | 1221.22(1088.94,1378.54) | 81150.99(70923.08,94350.86) | 1184.36(1054.37,1333.71) | 166.72(155.57,178.02) | -3.02(-6.51,0.19) | -0.12(-0.16,-0.09) |
| Bermuda | 690.65(605.74,789.59) | 1048.20(927.25,1191.11) | 1104.84(978.98,1243.63) | 987.49(874.41,1117.70) | 59.97(50.53,70.69) | -5.79(-8.97,-2.55) | -0.23(-0.26,-0.20) |
| Bhutan | 5187.95(4378.14,6085.79) | 1505.50(1322.18,1692.57) | 9679.26(8439.88,10997.80) | 1412.36(1252.96,1592.37) | 86.57(73.37,99.97) | -6.19(-9.37,-3.23) | -0.24(-0.26,-0.23) |
| Bolivia (Plurinational State of) | 40055.21(34581.92,45904.49) | 1026.84(904.57,1149.46) | 99610.09(86944.66,113087.97) | 988.53(871.87,1110.12) | 148.68(137.19,161.39) | -3.73(-7.09,-0.37) | -0.13(-0.16,-0.10) |
| Bosnia and Herzegovina | 38234.83(33999.58,42667.15) | 889.29(795.18,991.11) | 48775.07(43268.98,54151.58) | 873.28(775.32,972.30) | 27.57(21.04,34.82) | -1.80(-6.16,1.80) | -0.05(-0.06,-0.04) |
| Botswana | 9239.19(7950.40,10742.45) | 1343.28(1182.34,1519.18) | 24031.66(20703.84,27489.91) | 1328.26(1168.01,1488.99) | 160.11(147.94,172.05) | -1.12(-4.25,1.97) | -0.06(-0.07,-0.05) |
| Brazil | 1325115.16(1196378.44,1451362.75) | 1267.25(1154.24,1372.74) | 2886921.84(2647319.61,3121112.44) | 1144.93(1052.70,1235.54) | 117.86(108.39,126.80) | -9.65(-12.06,-7.62) | -0.37(-0.38,-0.35) |
| Brunei Darussalam | 2310.33(1999.30,2725.38) | 1549.20(1381.20,1734.12) | 6293.47(5525.67,7170.84) | 1496.78(1332.34,1665.65) | 172.41(155.70,189.92) | -3.38(-6.42,-0.34) | -0.16(-0.18,-0.14) |
| Bulgaria | 103846.51(93229.93,116362.02) | 894.50(801.60,1003.62) | 105860.84(96669.58,116902.15) | 837.63(761.04,931.52) | 1.94(-3.65,7.69) | -6.36(-11.45,-1.86) | -0.23(-0.24,-0.22) |
| Burkina Faso | 58352.18(50414.90,66955.42) | 1153.36(1012.88,1301.65) | 131700.84(114140.98,152116.44) | 1123.57(996.51,1260.84) | 125.70(118.07,133.36) | -2.58(-5.95,0.61) | -0.11(-0.13,-0.09) |
| Burundi | 30021.97(25420.73,35236.49) | 992.47(869.74,1131.82) | 67199.42(57412.67,78402.11) | 971.13(855.83,1106.14) | 123.83(113.02,134.46) | -2.15(-5.48,1.19) | -0.11(-0.13,-0.10) |
| Cabo Verde | 2925.11(2536.17,3405.05) | 1239.68(1096.72,1426.42) | 6007.02(5243.65,6976.51) | 1188.63(1049.96,1357.81) | 105.36(95.35,114.84) | -4.12(-7.43,-1.00) | -0.15(-0.16,-0.14) |
| Cambodia | 93483.66(79534.87,108855.47) | 1623.90(1405.74,1846.69) | 226660.17(194730.03,260658.71) | 1577.40(1373.25,1785.21) | 142.46(130.30,155.01) | -2.86(-6.24,0.42) | -0.14(-0.17,-0.12) |
| Cameroon | 72148.99(62636.19,82791.31) | 1324.56(1174.93,1483.38) | 226315.15(199402.63,257036.89) | 1384.21(1243.24,1537.69) | 213.68(201.31,225.28) | 4.50(0.70,8.13) | 0.18(0.06,0.30) |
| Canada | 241219.56(215820.82,274587.67) | 746.50(667.88,850.26) | 524389.41(467798.37,587910.85) | 812.44(717.15,918.79) | 117.39(100.92,133.10) | 8.83(0.16,16.83) | 0.35(0.29,0.42) |
| Central African Republic | 21275.78(18346.49,24703.17) | 1468.18(1297.48,1644.71) | 39618.66(34410.40,46082.05) | 1372.12(1220.51,1536.72) | 86.21(77.79,94.69) | -6.54(-9.75,-3.38) | -0.25(-0.26,-0.24) |
| Chad | 39844.40(34551.68,44908.85) | 1202.70(1069.20,1340.74) | 88095.97(76610.89,100190.01) | 1152.97(1026.52,1280.10) | 121.10(112.55,128.58) | -4.13(-7.63,-0.87) | -0.17(-0.18,-0.16) |
| Chile | 111414.73(97397.48,127938.15) | 1000.77(888.50,1130.99) | 227450.30(202147.21,257340.62) | 939.35(833.88,1071.88) | 104.15(91.50,116.47) | -6.14(-10.63,-2.39) | -0.22(-0.23,-0.20) |
| China | 11890522.04(10790476.43,13078707.77) | 1214.76(1109.34,1320.70) | 20911520.45(19184462.99,22605470.38) | 1053.92(971.11,1139.64) | 75.87(66.44,85.09) | -13.24(-15.87,-10.93) | -0.24(-0.39,-0.09) |
| Colombia | 287027.11(249463.83,330938.72) | 1327.25(1178.71,1490.32) | 664029.83(594164.54,740652.55) | 1212.70(1084.65,1352.83) | 131.35(116.08,148.31) | -8.63(-12.53,-4.75) | -0.28(-0.30,-0.25) |
| Comoros | 2608.06(2193.72,3069.25) | 1025.12(892.70,1170.69) | 5685.85(4898.81,6565.39) | 976.48(852.80,1108.36) | 118.01(107.34,128.99) | -4.74(-7.69,-1.42) | -0.20(-0.22,-0.17) |
| Congo | 19252.50(16637.89,22390.78) | 1476.58(1314.16,1655.43) | 48738.23(42610.68,56084.79) | 1412.08(1258.88,1584.74) | 153.15(141.70,163.99) | -4.37(-7.52,-1.32) | -0.19(-0.20,-0.17) |
| Cook Islands | 213.78(185.07,244.45) | 1478.80(1296.92,1661.00) | 323.73(285.69,363.80) | 1395.40(1229.20,1563.54) | 51.43(41.09,62.23) | -5.64(-9.02,-2.16) | -0.22(-0.23,-0.21) |
| Costa Rica | 32279.49(28193.80,36475.73) | 1568.16(1399.69,1737.37) | 78946.91(70881.91,87440.03) | 1448.79(1299.65,1603.60) | 144.57(127.74,162.35) | -7.61(-12.04,-2.69) | -0.20(-0.23,-0.18) |
| Côte d'Ivoire | 75528.07(64588.44,89488.62) | 1271.72(1135.88,1431.65) | 186054.53(161217.85,213429.45) | 1209.15(1071.58,1353.50) | 17.63(10.96,24.17) | -10.32(-15.60,-5.82) | -0.20(-0.21,-0.18) |
| Croatia | 55134.23(49186.63,61951.49) | 932.16(825.46,1045.65) | 64855.85(58202.59,72355.71) | 836.00(744.20,940.11) | 44.90(35.71,53.92) | -8.98(-12.71,-5.56) | -0.38(-0.39,-0.36) |
| Cuba | 118804.67(103057.46,136161.90) | 1104.96(963.70,1262.12) | 172151.51(153765.77,192178.63) | 1005.72(888.55,1134.40) | 109.74(97.68,120.01) | -13.39(-18.05,-9.52) | -0.35(-0.39,-0.32) |
| Cyprus | 7915.35(7052.89,8886.61) | 954.40(853.61,1073.39) | 16601.26(14899.13,18612.11) | 826.60(738.92,929.61) | 27.95(22.20,33.80) | -12.01(-16.83,-7.70) | -0.51(-0.53,-0.50) |
| Czechia | 119541.39(107518.51,132879.21) | 922.36(826.25,1031.35) | 152954.62(138276.27,168817.53) | 811.60(727.48,900.62) | 146.34(133.36,158.97) | -4.92(-8.07,-1.91) | -0.39(-0.43,-0.35) |
| Democratic People's Republic of Korea | 204638.45(176799.22,233204.46) | 1139.93(991.86,1289.01) | 342607.41(300188.83,386124.28) | 1045.53(918.41,1177.73) | 67.42(58.53,75.76) | -8.28(-11.57,-4.95) | -0.38(-0.41,-0.35) |
| Democratic Republic of the Congo | 292383.26(252459.96,337904.54) | 1487.82(1319.24,1657.78) | 647909.45(564591.90,740764.94) | 1377.98(1241.27,1530.46) | 121.60(111.90,130.99) | -7.38(-10.64,-4.09) | -0.35(-0.38,-0.32) |
| Denmark | 60095.72(53340.00,66836.49) | 809.75(713.40,909.06) | 79965.22(71880.76,88163.13) | 775.24(686.30,866.96) | 33.06(24.73,41.12) | -4.26(-10.37,1.51) | -0.22(-0.25,-0.18) |
| Djibouti | 1993.27(1615.56,2374.52) | 924.74(789.19,1045.69) | 8466.49(7062.22,9848.59) | 942.61(805.58,1065.71) | 324.75(295.22,353.48) | 1.93(-1.87,5.25) | 0.03(0.02,0.05) |
| Dominica | 701.29(611.69,795.61) | 1163.29(1018.39,1315.51) | 928.11(821.42,1036.69) | 1144.46(1010.56,1282.74) | 32.34(25.92,39.21) | -1.62(-5.09,2.17) | -0.07(-0.09,-0.05) |
| Dominican Republic | 50710.12(43332.31,59438.79) | 1097.88(965.58,1247.92) | 113995.41(99857.47,129505.14) | 1082.80(952.82,1226.45) | 124.80(110.07,140.37) | -1.37(-5.13,2.34) | -0.03(-0.05,-0.00) |
| Ecuador | 66332.96(57939.96,77374.21) | 1016.76(911.88,1155.79) | 170654.28(152196.63,192978.71) | 998.85(891.46,1126.47) | 157.27(142.23,172.68) | -1.76(-5.59,2.06) | -0.01(-0.05,0.03) |
| Egypt | 490135.95(420422.92,570364.20) | 1425.87(1261.72,1626.34) | 1168673.60(1018840.10,1342174.81) | 1509.01(1339.24,1721.09) | 138.44(129.58,148.20) | 5.83(2.98,9.02) | 0.24(0.20,0.28) |
| El Salvador | 40245.11(34877.03,46605.07) | 1178.97(1039.31,1334.48) | 71168.20(63260.77,80226.58) | 1150.89(1022.75,1295.20) | 76.84(66.80,87.18) | -2.38(-6.65,1.89) | 0.03(-0.01,0.08) |
| Equatorial Guinea | 3353.98(2913.87,3843.65) | 1456.42(1289.37,1634.95) | 10749.85(9231.31,12450.82) | 1431.10(1271.21,1607.75) | 220.51(208.16,234.64) | -1.74(-5.07,1.49) | -0.07(-0.08,-0.06) |
| Eritrea | 15970.58(13457.44,18991.34) | 941.21(824.16,1073.20) | 37145.43(31612.50,43730.60) | 932.27(815.69,1064.56) | 132.59(122.33,143.17) | -0.95(-4.18,2.21) | -0.05(-0.07,-0.04) |
| Estonia | 28881.98(25411.91,32727.40) | 1506.25(1315.78,1712.79) | 31279.28(27829.87,34624.74) | 1414.68(1250.29,1575.51) | 8.30(1.26,13.55) | -6.08(-12.55,-1.72) | -0.22(-0.25,-0.19) |
| Eswatini | 5000.75(4300.71,5766.95) | 1345.29(1185.90,1498.72) | 9390.25(8136.36,10746.96) | 1335.47(1182.96,1494.06) | 87.78(80.58,96.14) | -0.73(-3.55,2.64) | -0.03(-0.05,-0.02) |
| Ethiopia | 251706.55(225091.86,284392.45) | 955.38(865.40,1054.02) | 557970.38(502100.20,632388.12) | 930.85(848.74,1030.01) | 121.67(113.61,130.24) | -2.57(-5.29,-0.02) | -0.08(-0.11,-0.05) |
| Fiji | 7576.48(6327.56,8766.83) | 1524.53(1315.50,1725.12) | 12510.39(10730.74,14229.85) | 1478.78(1274.26,1670.46) | 65.12(53.68,77.04) | -3.00(-6.44,0.63) | -0.10(-0.12,-0.08) |
| Finland | 52538.70(46727.90,59310.14) | 779.64(689.51,886.59) | 73978.98(67049.98,82022.65) | 697.82(623.11,779.07) | 40.81(32.41,48.43) | -10.50(-17.04,-5.91) | -0.29(-0.35,-0.23) |
| France | 500524.32(444365.39,555709.45) | 655.40(575.76,733.11) | 734736.96(660803.47,815652.89) | 622.22(554.30,695.53) | 46.79(37.70,55.68) | -5.06(-10.84,-0.06) | -0.17(-0.26,-0.07) |
| Gabon | 9166.61(8002.15,10474.89) | 1442.41(1269.73,1621.80) | 17152.79(15040.51,19460.48) | 1388.03(1232.81,1549.73) | 87.12(79.13,94.73) | -3.77(-6.99,-0.64) | -0.15(-0.17,-0.14) |
| Gambia | 5990.31(5071.97,7055.86) | 1223.87(1068.76,1376.92) | 15262.82(13095.90,17832.02) | 1184.16(1049.00,1337.41) | 154.79(143.87,167.28) | -3.24(-6.43,0.20) | -0.13(-0.14,-0.11) |
| Georgia | 96240.92(85492.22,107643.73) | 1588.85(1413.19,1774.79) | 78720.46(71075.96,86674.56) | 1493.45(1344.48,1657.60) | -18.20(-22.51,-13.59) | -6.00(-9.84,-1.78) | -0.23(-0.25,-0.20) |
| Germany | 935922.42(842334.63,1030960.16) | 799.13(715.16,888.45) | 1245910.46(1137850.69,1359608.44) | 741.09(674.06,816.57) | 33.12(25.82,39.93) | -7.26(-12.37,-2.26) | -0.30(-0.42,-0.18) |
| Ghana | 90844.77(76632.42,106143.44) | 1062.95(926.57,1201.94) | 223569.17(192823.45,258568.90) | 1002.46(880.73,1128.62) | 146.10(133.42,158.52) | -5.69(-9.17,-2.25) | -0.22(-0.24,-0.21) |
| Greece | 130010.90(115904.43,145268.75) | 926.53(817.43,1036.43) | 165046.62(149279.22,183060.41) | 827.61(740.86,923.43) | 26.95(20.31,34.07) | -10.68(-14.70,-6.83) | -0.41(-0.43,-0.39) |
| Greenland | 269.07(226.97,309.02) | 766.25(666.27,857.75) | 671.68(593.19,745.06) | 993.45(879.15,1097.62) | 149.63(129.35,174.73) | 29.65(21.88,39.17) | 0.89(0.86,0.92) |
| Grenada | 827.07(725.30,934.41) | 1180.29(1031.49,1333.51) | 1341.36(1174.31,1511.21) | 1161.03(1014.55,1305.33) | 62.18(53.89,69.95) | -1.63(-5.38,1.77) | -0.07(-0.09,-0.05) |
| Guam | 1527.50(1313.19,1807.52) | 1454.62(1271.71,1661.04) | 2732.57(2397.80,3099.07) | 1411.94(1232.69,1601.47) | 78.89(63.48,95.42) | -2.93(-6.70,0.81) | -0.10(-0.11,-0.08) |
| Guatemala | 54807.74(47926.94,62544.35) | 1301.03(1155.68,1452.80) | 163035.81(143806.46,183692.61) | 1347.35(1196.96,1509.38) | 197.47(183.05,211.60) | 3.56(-0.02,7.47) | 0.19(0.15,0.22) |
| Guinea | 44656.06(39099.23,50836.17) | 1199.04(1063.85,1347.37) | 83061.98(71865.27,95451.08) | 1175.85(1041.27,1320.01) | 86.00(78.68,92.68) | -1.93(-5.42,1.22) | -0.06(-0.09,-0.04) |
| Guinea-Bissau | 6407.17(5453.07,7439.14) | 1256.67(1107.39,1405.66) | 12265.82(10490.79,14132.20) | 1195.69(1054.05,1342.70) | 91.44(82.77,99.71) | -4.85(-8.26,-1.58) | -0.19(-0.20,-0.18) |
| Guyana | 5698.82(4935.72,6703.73) | 1163.23(1029.52,1312.63) | 7802.82(6929.08,8812.77) | 1126.01(1006.41,1260.23) | 36.92(27.92,45.98) | -3.20(-6.66,0.41) | -0.12(-0.14,-0.11) |
| Haiti | 45587.46(39401.69,52314.47) | 1169.90(1028.85,1313.11) | 102643.46(88944.77,117365.51) | 1142.09(1010.16,1288.74) | 125.16(115.79,133.79) | -2.38(-5.47,0.82) | -0.09(-0.10,-0.08) |
| Honduras | 35031.02(30258.26,40127.95) | 1404.06(1243.42,1560.53) | 96888.57(85709.67,108727.83) | 1334.00(1191.21,1484.62) | 176.58(161.69,190.34) | -4.99(-8.59,-1.43) | -0.17(-0.19,-0.15) |
| Hungary | 129769.81(115268.75,145762.76) | 953.72(844.54,1083.46) | 142227.68(126987.69,157140.58) | 831.70(742.63,930.43) | 9.60(3.95,15.31) | -12.79(-18.39,-8.42) | -0.49(-0.51,-0.46) |
| Iceland | 2042.86(1835.57,2301.26) | 731.81(655.16,823.33) | 3439.30(3105.06,3862.59) | 672.20(604.70,760.69) | 68.36(60.61,76.37) | -8.15(-11.63,-4.28) | -0.33(-0.38,-0.28) |
| India | 10452093.43(9353026.53,11529934.47) | 1777.93(1615.96,1940.55) | 20825525.41(18968514.84,22827603.79) | 1586.69(1450.73,1726.70) | 99.25(91.06,107.44) | -10.76(-13.15,-8.51) | -0.48(-0.58,-0.39) |
| Indonesia | 2287823.51(2034136.31,2559184.48) | 1815.91(1644.47,1998.01) | 4884348.74(4426931.24,5419194.60) | 1774.63(1619.37,1945.78) | 113.49(102.47,123.21) | -2.27(-5.02,0.27) | -0.25(-0.35,-0.15) |
| Iran (Islamic Republic of) | 495893.52(447703.96,543796.06) | 1537.90(1408.15,1670.43) | 1268663.35(1166386.01,1386760.64) | 1466.48(1345.09,1586.75) | 155.83(145.35,166.83) | -4.64(-6.79,-2.57) | -0.16(-0.19,-0.13) |
| Iraq | 178843.45(151774.33,208203.92) | 1711.61(1500.13,1941.35) | 482686.73(419821.89,558918.37) | 1585.59(1395.30,1795.76) | 169.89(156.16,185.63) | -7.36(-10.31,-4.01) | -0.29(-0.31,-0.27) |
| Ireland | 42815.58(37842.74,48307.77) | 1079.44(953.07,1223.87) | 67783.26(61352.09,75418.26) | 921.82(829.32,1032.29) | 58.31(45.66,69.92) | -14.60(-21.42,-8.96) | -0.51(-0.54,-0.48) |
| Israel | 46013.70(40797.65,51511.57) | 950.34(842.99,1066.94) | 97935.20(87645.10,109483.03) | 851.27(761.97,949.74) | 112.84(101.86,124.30) | -10.42(-14.35,-6.25) | -0.41(-0.43,-0.38) |
| Italy | 665908.07(607390.16,716987.98) | 815.03(740.60,882.61) | 789149.82(722680.69,853243.55) | 646.37(585.94,704.15) | 18.51(13.44,22.67) | -20.69(-25.95,-17.44) | -0.60(-0.68,-0.52) |
| Jamaica | 19625.05(17139.84,22258.12) | 1062.83(932.15,1186.48) | 32935.03(29228.20,37033.16) | 1067.52(947.28,1201.06) | 67.82(61.08,75.41) | 0.44(-2.77,3.99) | 0.00(-0.03,0.03) |
| Japan | 2409617.61(2218436.33,2607887.24) | 1490.11(1367.35,1613.04) | 3529802.08(3243067.23,3800842.40) | 1326.15(1221.21,1429.23) | 46.49(41.40,52.15) | -11.00(-12.89,-9.21) | -0.39(-0.48,-0.31) |
| Jordan | 31163.15(26516.17,36872.60) | 1623.20(1413.45,1850.99) | 144069.47(124295.40,165021.71) | 1501.73(1310.04,1700.95) | 362.31(334.62,393.24) | -7.48(-10.46,-4.43) | -0.32(-0.35,-0.28) |
| Kazakhstan | 225747.05(197993.30,256475.84) | 1633.29(1447.67,1824.75) | 289296.06(256707.10,322890.36) | 1542.49(1364.54,1715.70) | 28.15(21.67,34.15) | -5.56(-9.01,-2.48) | -0.22(-0.23,-0.21) |
| Kenya | 110296.03(97469.37,124011.85) | 969.44(880.32,1056.91) | 285172.50(258001.21,315221.78) | 936.19(856.73,1016.15) | 158.55(137.38,175.56) | -3.43(-7.56,-0.30) | -0.16(-0.18,-0.14) |
| Kiribati | 708.11(598.36,818.13) | 1489.37(1291.13,1676.61) | 1249.90(1077.74,1418.58) | 1418.72(1243.26,1597.71) | 76.51(67.15,85.23) | -4.74(-8.29,-1.64) | -0.16(-0.18,-0.14) |
| Kuwait | 18899.80(15666.70,22439.10) | 1633.38(1421.88,1846.89) | 65350.58(56092.70,75889.96) | 1455.36(1282.27,1647.54) | 245.77(218.95,279.83) | -10.90(-14.61,-7.07) | -0.41(-0.43,-0.39) |
| Kyrgyzstan | 50940.70(44864.84,57364.57) | 1561.02(1393.04,1738.51) | 76570.62(68164.42,86251.91) | 1412.98(1268.96,1579.00) | 50.31(43.05,57.48) | -9.48(-12.92,-6.20) | -0.38(-0.41,-0.35) |
| Lao People's Democratic Republic | 46862.77(39905.46,54446.23) | 1861.48(1613.36,2115.70) | 100672.98(86118.52,116587.16) | 1757.27(1528.38,1999.86) | 114.83(106.07,124.87) | -5.60(-8.75,-2.18) | -0.23(-0.26,-0.20) |
| Latvia | 52180.90(45141.62,59316.99) | 1586.53(1363.07,1812.08) | 46903.37(40963.66,52333.72) | 1469.31(1280.82,1669.21) | -10.11(-14.70,-5.51) | -7.39(-12.10,-3.18) | -0.27(-0.28,-0.25) |
| Lebanon | 37300.45(32049.62,42967.09) | 1554.03(1353.54,1785.02) | 90584.44(79132.72,103802.31) | 1496.72(1305.25,1718.14) | 142.85(132.89,151.76) | -3.69(-6.86,-0.74) | -0.12(-0.16,-0.08) |
| Lesotho | 11646.50(10278.93,13149.55) | 1247.89(1107.58,1403.73) | 16174.92(14227.28,18303.27) | 1290.77(1155.94,1443.64) | 38.88(34.72,43.86) | 3.44(0.19,6.87) | 0.13(0.12,0.14) |
| Liberia | 17928.64(15533.63,20455.88) | 1273.16(1132.22,1423.23) | 36350.06(31440.46,41751.55) | 1204.31(1077.30,1340.91) | 102.75(93.10,112.52) | -5.41(-8.46,-2.12) | -0.18(-0.19,-0.17) |
| Libya | 39733.42(34186.55,46927.70) | 1619.23(1420.22,1835.86) | 101249.29(88810.98,117422.81) | 1555.01(1378.98,1755.88) | 154.82(138.53,171.36) | -3.97(-7.36,-0.74) | -0.13(-0.15,-0.11) |
| Lithuania | 67594.42(59496.49,76800.37) | 1578.91(1384.61,1815.50) | 67895.66(60625.05,76545.51) | 1465.08(1297.50,1655.79) | 0.45(-6.61,6.61) | -7.21(-13.83,-2.33) | -0.27(-0.29,-0.24) |
| Luxembourg | 4810.72(4295.02,5368.83) | 934.51(830.82,1046.69) | 8219.35(7365.45,9201.22) | 849.21(756.51,952.34) | 70.85(62.28,78.43) | -9.13(-14.07,-4.83) | -0.31(-0.35,-0.28) |
| Madagascar | 63150.42(52983.99,73150.14) | 960.56(837.36,1092.12) | 148499.98(125775.94,172949.85) | 932.08(811.71,1064.30) | 135.15(123.82,146.41) | -2.96(-6.72,0.24) | -0.13(-0.16,-0.10) |
| Malawi | 48352.58(41019.91,57399.54) | 953.86(832.34,1103.84) | 96504.53(82839.03,113466.00) | 957.56(833.45,1096.35) | 99.59(81.05,112.98) | 0.39(-5.03,4.55) | -0.04(-0.06,-0.02) |
| Malaysia | 231262.20(196007.98,271639.12) | 1923.06(1679.60,2205.23) | 578484.48(496848.78,662324.44) | 1852.54(1601.54,2110.34) | 150.14(136.95,164.37) | -3.67(-6.86,-0.05) | -0.01(-0.07,0.06) |
| Maldives | 2159.86(1800.90,2509.97) | 1847.91(1583.14,2090.12) | 8623.86(7288.03,10147.24) | 1747.03(1495.03,1981.55) | 299.28(279.00,320.57) | -5.46(-8.57,-2.07) | -0.23(-0.27,-0.19) |
| Mali | 58770.48(50983.41,67651.01) | 1222.66(1087.96,1369.54) | 132143.58(115492.53,151917.99) | 1164.90(1044.04,1308.84) | 124.85(117.15,132.67) | -4.72(-8.10,-1.85) | -0.19(-0.21,-0.17) |
| Malta | 3629.68(3228.34,4039.52) | 859.21(763.40,958.07) | 6731.43(6005.16,7472.99) | 800.78(716.36,894.65) | 85.46(75.12,95.80) | -6.80(-11.29,-2.32) | -0.25(-0.29,-0.21) |
| Marshall Islands | 336.70(282.58,397.06) | 1471.72(1285.32,1674.77) | 612.08(523.92,698.07) | 1407.96(1235.70,1586.33) | 81.79(68.95,94.43) | -4.33(-7.90,-1.10) | -0.16(-0.17,-0.15) |
| Mauritania | 14625.57(12731.74,17028.67) | 1223.38(1088.73,1395.86) | 29193.14(25726.48,33519.48) | 1135.44(1017.33,1287.87) | 99.60(90.95,107.89) | -7.19(-10.30,-4.09) | -0.30(-0.33,-0.27) |
| Mauritius | 16238.02(13656.91,18775.07) | 1850.04(1595.03,2097.27) | 32684.46(28704.75,36887.72) | 1884.21(1644.51,2141.81) | 101.28(87.77,117.93) | 1.85(-1.80,6.28) | 0.08(0.04,0.12) |
| Mexico | 753539.43(679698.73,827535.16) | 1449.96(1332.22,1569.46) | 1802771.14(1666161.52,1944522.33) | 1375.47(1273.87,1478.82) | 139.24(128.17,150.84) | -5.14(-7.61,-2.55) | -0.15(-0.17,-0.13) |
| Micronesia (Federated States of) | 880.01(762.79,1033.28) | 1457.08(1298.03,1650.49) | 1194.80(1058.57,1355.67) | 1415.00(1272.39,1597.40) | 35.77(27.27,43.85) | -2.89(-6.32,0.14) | -0.11(-0.13,-0.09) |
| Monaco | 491.67(440.99,551.18) | 853.85(749.85,965.52) | 627.14(566.16,697.39) | 792.05(703.71,890.27) | 27.55(22.47,32.60) | -7.24(-11.67,-3.29) | -0.27(-0.30,-0.23) |
| Mongolia | 21014.44(18111.33,24046.44) | 1654.56(1454.99,1847.86) | 40709.56(35657.89,46183.54) | 1504.21(1336.68,1680.87) | 93.72(82.71,104.03) | -9.09(-12.32,-5.86) | -0.35(-0.37,-0.33) |
| Montenegro | 5875.01(5214.16,6587.17) | 929.16(827.09,1041.57) | 7985.32(7122.62,8920.43) | 875.22(779.37,983.23) | 35.92(29.31,42.26) | -5.81(-9.96,-2.43) | -0.22(-0.23,-0.20) |
| Morocco | 273423.69(230179.95,322010.73) | 1564.76(1354.81,1803.18) | 539970.09(467285.55,625058.99) | 1462.29(1273.02,1682.17) | 97.48(84.95,110.85) | -6.55(-9.65,-3.27) | -0.28(-0.30,-0.26) |
| Mozambique | 73161.04(62534.15,84401.71) | 973.69(840.82,1101.47) | 153796.97(131651.41,178657.30) | 998.91(868.11,1137.61) | 110.22(101.35,119.71) | 2.59(-0.91,6.33) | 0.06(0.05,0.08) |
| Myanmar | 508236.36(435109.10,589451.71) | 1811.82(1583.77,2057.08) | 900462.49(771781.94,1034310.27) | 1701.86(1471.22,1937.95) | 77.17(67.39,86.82) | -6.07(-9.42,-2.58) | -0.22(-0.24,-0.19) |
| Namibia | 10550.40(9206.41,12066.62) | 1353.26(1201.77,1511.38) | 20939.38(18288.72,23925.83) | 1270.78(1127.34,1421.12) | 98.47(90.55,107.09) | -6.10(-8.92,-2.98) | -0.24(-0.25,-0.22) |
| Nauru | 98.18(82.97,114.67) | 1563.44(1376.70,1777.70) | 111.13(95.44,128.40) | 1506.14(1324.17,1718.83) | 13.19(8.03,18.50) | -3.66(-6.88,-0.38) | -0.15(-0.16,-0.13) |
| Nepal | 179066.10(157601.81,206355.75) | 1594.71(1429.64,1785.91) | 380851.56(339136.07,433979.71) | 1514.44(1358.39,1709.26) | 112.69(101.51,126.09) | -5.03(-8.24,0.86) | -0.35(-0.42,-0.29) |
| Netherlands | 176474.78(157812.35,196981.50) | 926.50(823.88,1040.39) | 258814.89(234764.48,286853.87) | 862.54(771.06,965.12) | 46.66(38.11,55.26) | -6.90(-12.50,-2.17) | -0.43(-0.51,-0.35) |
| New Zealand | 34281.00(30853.56,38236.49) | 888.48(799.64,990.42) | 65967.26(59663.54,72629.65) | 863.25(779.38,956.87) | 92.43(85.55,99.41) | -2.84(-5.74,0.07) | -0.06(-0.13,0.01) |
| Nicaragua | 30329.98(26010.91,35131.14) | 1573.66(1396.62,1764.17) | 84953.64(76030.15,95325.21) | 1575.13(1415.29,1749.26) | 180.10(161.28,201.23) | 0.09(-4.89,6.05) | -0.05(-0.07,-0.03) |
| Niger | 42979.68(36697.93,49720.16) | 1144.40(1015.01,1272.53) | 115358.33(100111.40,131141.66) | 1085.38(972.74,1204.22) | 168.40(156.10,179.12) | -5.16(-8.57,-2.04) | -0.20(-0.22,-0.18) |
| Nigeria | 749899.33(688160.11,814041.67) | 1447.37(1335.47,1551.84) | 1625850.28(1503432.87,1770172.45) | 1413.00(1304.58,1523.20) | 116.81(110.58,123.17) | -2.37(-4.47,-0.34) | -0.01(-0.04,0.01) |
| Niue | 32.97(28.73,37.37) | 1560.70(1359.07,1772.71) | 30.22(26.50,33.94) | 1491.36(1299.70,1684.50) | -8.34(-12.35,-4.14) | -4.44(-8.06,-0.84) | -0.17(-0.18,-0.16) |
| North Macedonia | 19467.85(17305.48,21655.46) | 1019.87(909.09,1129.55) | 31577.62(28315.34,34972.05) | 978.01(880.53,1082.45) | 62.20(54.74,68.86) | -4.10(-7.68,-0.68) | -0.17(-0.20,-0.15) |
| Northern Mariana Islands | 505.41(419.76,596.35) | 1562.72(1384.12,1743.79) | 818.72(724.74,921.04) | 1494.21(1329.81,1666.96) | 61.99(45.17,82.67) | -4.38(-7.91,-0.95) | -0.17(-0.18,-0.15) |
| Norway | 49434.39(44881.63,53346.45) | 829.01(748.84,901.17) | 66310.78(60666.18,71917.43) | 767.27(695.14,835.43) | 34.14(27.73,38.83) | -7.45(-13.19,-3.51) | -0.26(-0.31,-0.22) |
| Oman | 15155.36(12638.78,17830.97) | 1393.51(1219.12,1580.56) | 52146.52(44420.58,61120.27) | 1460.55(1289.28,1662.14) | 244.08(225.44,261.29) | 4.81(1.13,8.05) | 0.14(0.09,0.19) |
| Pakistan | 979608.71(870675.28,1097995.90) | 1444.57(1294.71,1594.58) | 2202471.51(1971549.65,2458813.65) | 1411.97(1273.91,1547.37) | 124.83(117.74,132.44) | -2.26(-4.92,0.39) | -0.10(-0.14,-0.07) |
| Palau | 183.52(157.67,212.23) | 1522.33(1325.79,1727.44) | 343.07(298.21,391.38) | 1478.61(1296.22,1677.24) | 86.93(72.50,100.44) | -2.87(-6.15,0.02) | -0.11(-0.12,-0.10) |
| Palestine | 16919.96(14431.61,19752.20) | 1559.70(1368.44,1765.86) | 47852.98(41154.03,55360.21) | 1441.06(1272.97,1620.28) | 182.82(169.34,196.56) | -7.61(-10.73,-4.48) | -0.28(-0.33,-0.23) |
| Panama | 24002.02(21038.92,27592.58) | 1393.98(1232.76,1580.76) | 58149.09(51577.00,65623.89) | 1322.53(1173.44,1492.50) | 142.27(127.70,156.76) | -5.13(-9.61,-0.66) | -0.18(-0.19,-0.16) |
| Papua New Guinea | 32843.82(27298.76,37971.89) | 1343.59(1168.59,1509.80) | 88097.47(74958.15,101091.31) | 1299.94(1144.16,1456.93) | 168.23(156.08,182.59) | -3.25(-6.74,0.29) | -0.11(-0.14,-0.09) |
| Paraguay | 31817.48(27635.73,36521.67) | 1232.38(1088.69,1391.43) | 73845.61(65262.60,83666.45) | 1176.18(1042.53,1326.23) | 132.09(120.34,143.78) | -4.56(-8.36,-0.46) | -0.17(-0.18,-0.16) |
| Peru | 137702.72(118674.91,160375.41) | 956.32(840.89,1089.62) | 326874.37(286518.84,374729.62) | 928.05(816.90,1057.35) | 137.38(125.22,149.68) | -2.96(-6.38,0.34) | -0.07(-0.11,-0.04) |
| Philippines | 727091.22(655237.29,806428.06) | 1849.56(1691.95,2013.00) | 1613687.16(1475734.47,1760668.22) | 1707.82(1565.25,1847.94) | 121.94(111.80,131.26) | -7.66(-10.00,-5.72) | -0.35(-0.41,-0.30) |
| Poland | 424168.12(389294.05,457802.64) | 982.90(902.46,1063.04) | 569200.95(525192.08,617150.02) | 890.85(815.48,963.21) | 34.19(29.62,38.16) | -9.36(-12.19,-7.16) | -0.40(-0.43,-0.36) |
| Portugal | 107654.85(95618.59,119185.58) | 840.38(748.52,936.79) | 145815.34(130602.25,162175.74) | 733.89(653.84,817.34) | 35.45(25.98,42.12) | -12.67(-17.17,-9.33) | -0.44(-0.48,-0.39) |
| Puerto Rico | 40855.70(36338.09,46172.19) | 1124.53(1000.51,1270.46) | 62496.21(56099.19,69389.32) | 1102.01(978.20,1245.51) | 52.97(44.34,61.02) | -2.00(-5.42,1.48) | -0.07(-0.09,-0.06) |
| Qatar | 5132.23(4185.36,6220.16) | 1678.66(1486.21,1901.53) | 38763.42(32760.09,46197.64) | 1553.98(1375.01,1749.48) | 655.29(605.96,705.63) | -7.43(-10.38,-4.14) | -0.32(-0.36,-0.29) |
| Republic of Korea | 444221.95(381841.18,508891.76) | 1249.57(1091.69,1402.51) | 941916.11(836463.82,1053706.20) | 1110.95(975.04,1243.34) | 112.04(97.09,128.73) | -11.09(-14.37,-7.67) | -0.59(-0.66,-0.52) |
| Republic of Moldova | 77159.67(67991.13,87677.72) | 1723.77(1521.97,1950.96) | 91045.00(81293.91,101551.00) | 1669.11(1482.46,1876.11) | 18.00(11.08,24.27) | -3.17(-8.04,0.93) | -0.13(-0.18,-0.07) |
| Romania | 243157.60(215858.56,274030.44) | 907.18(803.55,1025.10) | 279159.28(253618.89,307034.01) | 840.29(757.92,931.86) | 14.81(8.26,21.14) | -7.37(-12.82,-2.48) | -0.48(-0.55,-0.41) |
| Russian Federation | 2598710.39(2374569.14,2847906.43) | 1498.59(1368.23,1637.44) | 2866519.46(2611271.11,3133121.22) | 1347.69(1238.41,1470.60) | 10.31(4.97,14.72) | -10.07(-14.53,-6.77) | -0.39(-0.41,-0.37) |
| Rwanda | 36281.42(30399.99,42923.63) | 964.34(832.77,1090.82) | 73577.24(62541.68,84245.71) | 892.54(771.28,1001.61) | 102.80(86.13,116.59) | -7.45(-11.71,-3.84) | -0.34(-0.40,-0.28) |
| Saint Kitts and Nevis | 427.40(382.57,478.14) | 1170.53(1050.16,1301.59) | 807.37(723.21,902.59) | 1118.33(1006.03,1246.94) | 88.90(78.16,100.13) | -4.46(-7.85,-1.13) | -0.20(-0.22,-0.18) |
| Saint Lucia | 1151.24(1001.10,1310.32) | 1183.14(1047.77,1321.76) | 2593.14(2321.53,2888.80) | 1115.29(996.48,1244.66) | 125.25(110.41,140.75) | -5.73(-9.23,-2.40) | -0.18(-0.21,-0.16) |
| Saint Vincent and the Grenadines | 857.96(744.49,984.84) | 1100.93(969.67,1258.25) | 1524.79(1351.14,1718.99) | 1104.34(975.51,1248.06) | 77.72(66.73,89.46) | 0.31(-3.28,3.86) | -0.02(-0.04,-0.01) |
| Samoa | 1536.03(1293.99,1771.23) | 1496.21(1306.52,1691.18) | 2293.44(1995.76,2606.36) | 1436.94(1264.60,1619.43) | 49.31(41.06,57.19) | -3.96(-7.52,-0.80) | -0.15(-0.17,-0.13) |
| San Marino | 274.93(243.02,306.08) | 853.03(749.99,953.92) | 480.71(427.55,538.55) | 778.80(691.62,874.33) | 74.85(66.65,83.30) | -8.70(-12.93,-4.80) | -0.34(-0.38,-0.30) |
| Sao Tome and Principe | 944.44(827.90,1077.33) | 1319.46(1173.74,1490.63) | 1823.81(1585.35,2082.53) | 1284.27(1145.56,1449.80) | 93.11(85.22,101.26) | -2.67(-6.06,0.82) | -0.10(-0.11,-0.08) |
| Saudi Arabia | 143280.84(119112.56,168334.05) | 1613.96(1401.65,1829.97) | 481885.32(410389.71,563774.85) | 1518.12(1323.67,1710.96) | 236.32(217.70,260.80) | -5.94(-9.02,-2.35) | -0.28(-0.31,-0.25) |
| Senegal | 50246.43(42951.55,59385.58) | 1222.32(1079.59,1389.67) | 105730.24(91721.83,122701.23) | 1090.90(964.19,1231.47) | 110.42(100.48,120.24) | -10.75(-14.38,-7.26) | -0.41(-0.43,-0.38) |
| Serbia | 100487.19(89186.36,113374.16) | 906.21(802.40,1023.52) | 120344.56(108395.12,134903.07) | 831.09(740.74,934.04) | 19.76(13.35,25.62) | -8.29(-13.01,-4.58) | -0.34(-0.36,-0.31) |
| Seychelles | 1157.21(989.37,1336.14) | 1909.93(1650.99,2176.66) | 2266.30(1969.86,2582.95) | 1869.16(1632.37,2123.41) | 95.84(84.23,108.01) | -2.13(-5.61,1.69) | -0.10(-0.12,-0.09) |
| Sierra Leone | 31854.30(27386.97,36551.89) | 1270.64(1126.72,1414.45) | 60487.90(52201.47,69067.87) | 1216.22(1070.79,1353.33) | 89.89(82.51,97.54) | -4.28(-7.52,-1.05) | -0.15(-0.17,-0.14) |
| Singapore | 49144.45(41735.72,56675.75) | 1780.26(1550.89,2015.92) | 129828.85(114282.72,145763.81) | 1558.79(1358.48,1762.23) | 164.18(144.54,183.99) | -12.44(-15.82,-8.98) | -0.46(-0.52,-0.40) |
| Slovakia | 53699.10(47572.06,60249.10) | 916.11(811.57,1032.47) | 71631.86(64218.22,80027.75) | 818.53(727.40,919.55) | 33.39(25.59,39.62) | -10.65(-16.27,-6.78) | -0.39(-0.40,-0.38) |
| Slovenia | 21874.58(19554.13,24822.42) | 916.68(817.31,1047.91) | 31800.18(28471.07,35397.92) | 842.39(747.47,953.26) | 45.38(36.79,54.34) | -8.11(-13.83,-3.49) | -0.36(-0.39,-0.33) |
| Solomon Islands | 2502.02(2100.84,2931.08) | 1399.73(1220.28,1587.98) | 5874.86(5020.19,6741.80) | 1332.36(1163.76,1501.06) | 134.81(122.95,145.76) | -4.81(-8.37,-1.52) | -0.18(-0.20,-0.16) |
| Somalia | 34317.65(28664.78,40987.36) | 918.77(803.86,1054.37) | 84440.88(70825.94,99772.17) | 891.45(780.48,1024.26) | 146.06(135.05,157.82) | -2.97(-6.14,0.18) | -0.12(-0.14,-0.11) |
| South Africa | 355296.93(323801.21,391232.18) | 1441.05(1321.31,1558.13) | 703915.30(644158.97,765503.07) | 1373.59(1261.89,1486.64) | 98.12(90.11,105.90) | -4.68(-7.27,-2.38) | -0.21(-0.23,-0.20) |
| South Sudan | 31097.57(26513.19,36249.23) | 956.02(844.27,1075.83) | 48233.08(41546.92,55858.44) | 936.06(823.66,1062.07) | 55.10(46.02,64.20) | -2.09(-5.59,1.55) | -0.09(-0.10,-0.07) |
| Spain | 424742.07(381227.49,466606.65) | 830.74(741.15,917.27) | 602895.16(543452.59,669488.13) | 715.11(638.78,797.82) | 41.94(31.51,49.06) | -13.92(-19.78,-10.18) | -0.53(-0.61,-0.45) |
| Sri Lanka | 251061.70(215389.52,289865.86) | 1874.91(1644.44,2128.64) | 469002.62(411399.04,527948.47) | 1793.00(1580.56,2019.76) | 86.81(73.58,99.93) | -4.37(-7.62,-1.10) | -0.13(-0.15,-0.11) |
| Sudan | 184683.59(159146.90,215021.62) | 1579.51(1380.56,1781.12) | 409482.74(350939.73,475294.82) | 1555.60(1368.49,1763.13) | 121.72(112.55,130.46) | -1.51(-4.79,1.52) | -0.09(-0.11,-0.07) |
| Suriname | 3356.25(2919.74,3867.61) | 1149.47(1015.42,1309.20) | 6940.16(6136.21,7863.15) | 1096.53(969.48,1246.18) | 106.78(94.84,119.84) | -4.61(-8.14,-1.03) | -0.17(-0.19,-0.16) |
| Sweden | 132517.39(117814.58,148280.63) | 1042.03(922.57,1184.57) | 169334.37(150919.38,187781.62) | 957.28(850.13,1075.25) | 27.78(23.12,32.46) | -8.13(-12.74,-4.18) | -0.26(-0.28,-0.24) |
| Switzerland | 99957.48(89433.45,110689.13) | 1043.20(925.25,1165.42) | 145267.41(130672.44,160702.81) | 940.03(839.51,1049.48) | 45.33(38.58,51.67) | -9.89(-13.32,-6.83) | -0.38(-0.44,-0.32) |
| Syrian Arab Republic | 105201.40(90055.49,121967.16) | 1557.06(1361.36,1752.72) | 202272.10(176302.70,229787.07) | 1456.12(1273.77,1648.11) | 92.27(76.75,108.22) | -6.48(-9.81,-3.10) | -0.27(-0.29,-0.25) |
| Taiwan | 215332.77(189071.66,247959.86) | 1208.40(1076.04,1365.28) | 407911.27(368363.08,454214.22) | 1068.88(961.81,1203.68) | 89.43(77.18,102.43) | -11.55(-14.87,-8.28) | -0.34(-0.37,-0.31) |
| Tajikistan | 47412.99(40747.82,54695.68) | 1491.64(1312.99,1692.61) | 99085.48(86548.03,113296.08) | 1415.22(1260.85,1597.48) | 108.98(99.09,120.29) | -5.12(-8.62,-1.43) | -0.20(-0.22,-0.19) |
| Thailand | 804657.18(693860.31,922896.06) | 1821.00(1603.78,2052.11) | 1811542.78(1611823.46,2013537.05) | 1819.72(1613.55,2034.20) | 125.13(107.05,143.68) | -0.07(-3.60,3.63) | -0.07(-0.10,-0.05) |
| Timor-Leste | 7677.10(6460.92,9079.00) | 1760.88(1537.67,1985.37) | 17118.79(14877.33,19651.27) | 1777.68(1554.62,2016.01) | 122.99(110.12,137.85) | 0.95(-2.36,4.17) | 0.03(0.01,0.04) |
| Togo | 20880.51(17559.46,24215.67) | 1207.94(1050.21,1347.92) | 56518.51(48237.87,64778.85) | 1134.50(990.11,1274.72) | 170.68(157.27,186.09) | -6.08(-9.21,-2.79) | -0.29(-0.32,-0.26) |
| Tokelau | 19.47(17.04,22.05) | 1473.58(1291.24,1667.51) | 20.44(18.12,22.99) | 1426.40(1263.76,1607.55) | 4.95(0.79,9.27) | -3.20(-6.76,0.03) | -0.12(-0.12,-0.11) |
| Tonga | 968.75(832.30,1110.21) | 1528.68(1336.22,1730.93) | 1236.61(1077.18,1389.66) | 1465.23(1277.04,1644.07) | 27.65(21.15,33.98) | -4.15(-7.94,-0.94) | -0.13(-0.15,-0.11) |
| Trinidad and Tobago | 10934.30(9515.36,12448.77) | 1145.10(1007.18,1285.10) | 20826.28(18364.21,23309.79) | 1135.22(1001.84,1275.31) | 90.47(78.54,101.99) | -0.86(-4.64,2.55) | -0.06(-0.07,-0.05) |
| Tunisia | 90982.65(77905.91,105656.00) | 1531.62(1332.68,1753.26) | 194310.75(169201.42,224186.17) | 1441.34(1263.44,1660.06) | 113.57(100.48,126.83) | -5.89(-9.02,-2.65) | -0.25(-0.26,-0.23) |
| Türkiye | 702989.19(604695.95,812195.18) | 1696.37(1483.81,1933.07) | 1494520.06(1319956.20,1700293.43) | 1571.77(1385.96,1789.36) | 85.31(75.07,96.02) | -5.19(-9.03,-1.37) | -0.23(-0.27,-0.19) |
| Turkmenistan | 35915.94(31188.33,41440.09) | 1593.17(1419.70,1785.38) | 66556.10(59249.51,74668.23) | 1510.54(1356.16,1680.22) | 44.96(38.93,50.91) | -2.05(-5.29,1.33) | -0.18(-0.19,-0.17) |
| Tuvalu | 108.67(92.72,125.68) | 1458.81(1261.18,1670.86) | 157.53(137.13,180.01) | 1428.88(1254.22,1625.06) | 112.60(100.00,126.73) | -7.35(-10.53,-3.92) | -0.09(-0.10,-0.08) |
| Uganda | 86424.50(72775.97,101071.23) | 1017.02(886.98,1151.60) | 200738.60(168812.05,233803.76) | 972.79(846.19,1111.77) | 132.27(122.50,142.67) | -4.35(-7.43,-1.34) | -0.21(-0.24,-0.19) |
| Ukraine | 1049913.14(921148.34,1187628.81) | 1612.42(1401.04,1853.12) | 1007293.98(896599.10,1127661.65) | 1477.94(1311.33,1689.43) | -4.06(-8.14,-0.29) | -8.34(-12.48,-4.47) | -0.35(-0.37,-0.33) |
| United Arab Emirates | 19935.30(16452.18,24019.46) | 1703.59(1508.57,1908.09) | 153683.55(131037.99,177704.68) | 1578.93(1397.94,1758.60) | 670.91(589.77,756.14) | -7.32(-10.54,-4.19) | -0.30(-0.33,-0.27) |
| United Kingdom | 751631.35(693503.89,806115.90) | 902.22(835.75,970.27) | 906633.90(839183.53,970609.99) | 795.21(739.10,850.73) | 20.62(18.14,23.24) | -11.86(-13.54,-9.98) | -0.62(-0.75,-0.48) |
| United Republic of Tanzania | 119258.64(100659.09,141849.94) | 870.95(760.93,1002.92) | 314752.57(266576.31,368605.79) | 942.30(820.60,1073.95) | 163.92(143.01,180.15) | 8.19(2.72,12.39) | 0.30(0.26,0.34) |
| United States of America | 3190573.42(2957899.49,3415721.26) | 1035.31(959.55,1111.33) | 5677975.97(5252215.51,6091645.31) | 1085.39(1005.76,1165.45) | 77.96(74.22,81.77) | 4.84(3.49,6.41) | 0.36(0.29,0.43) |
| United States Virgin Islands | 1067.54(927.63,1217.13) | 1128.68(981.62,1276.53) | 1659.23(1471.48,1875.38) | 1099.90(966.86,1242.28) | 55.43(44.08,66.71) | -2.55(-5.82,0.72) | -0.11(-0.11,-0.10) |
| Uruguay | 33216.71(29416.59,36888.48) | 906.48(798.39,1011.13) | 45015.07(40207.86,50063.08) | 929.38(826.09,1046.66) | 35.52(30.38,40.38) | 2.53(-1.31,6.06) | 0.11(0.09,0.14) |
| Uzbekistan | 197832.52(171125.54,226520.33) | 1508.14(1337.21,1683.02) | 443792.95(389038.79,499988.21) | 1509.93(1345.74,1683.75) | 124.33(112.43,136.47) | 0.12(-3.54,3.68) | 0.02(0.00,0.04) |
| Vanuatu | 1326.52(1130.47,1555.21) | 1546.26(1359.86,1755.26) | 3165.89(2745.78,3655.82) | 1479.04(1307.56,1670.54) | 138.66(124.80,152.55) | -4.35(-7.86,-0.94) | -0.16(-0.18,-0.15) |
| Venezuela (Bolivarian Republic of) | 172690.46(148690.21,196250.52) | 1429.66(1264.70,1585.74) | 387706.17(344125.65,427868.98) | 1296.20(1146.84,1433.51) | 124.51(107.86,143.10) | -9.33(-13.19,-4.83) | -0.36(-0.42,-0.30) |
| Viet Nam | 767383.78(655594.77,894590.08) | 1629.42(1403.23,1861.07) | 1670778.71(1451352.57,1914265.94) | 1555.76(1353.38,1773.43) | 117.72(102.74,132.75) | -4.52(-8.11,-0.92) | -0.06(-0.12,-0.01) |
| Yemen | 94919.97(80867.94,110530.11) | 1448.11(1263.11,1633.92) | 270536.04(232375.22,312505.47) | 1406.85(1232.25,1580.68) | 185.01(172.90,196.35) | -2.85(-6.05,0.29) | -0.17(-0.20,-0.14) |
| Zambia | 37632.57(31238.65,44289.19) | 954.81(824.96,1082.41) | 99249.53(82807.76,117536.79) | 958.80(829.18,1099.68) | 163.73(151.81,176.19) | 0.42(-2.97,4.15) | 0.02(-0.01,0.06) |
| Zimbabwe | 69968.87(61017.32,79588.82) | 1363.72(1213.98,1523.23) | 115919.42(101555.55,131128.93) | 1331.53(1184.20,1482.33) | 65.67(58.72,73.23) | -2.36(-5.50,0.85) | -0.07(-0.09,-0.06) |

**Table S5: Incidence of Chronic kidney disease due to diabetes mellitus type 2 Between 1990 and 2021 at 204 Countries and Territories.**

| **Location** | **1990** | | **2021** | | **Percentage change in number between 1990 and 2021** | **Percentage change in ASR between 1990 and 2021** | **EAPC** |
| --- | --- | --- | --- | --- | --- | --- | --- |
| **Number** | **ASR** | **Number** | **ASR** |
| Afghanistan | 1859.35(1574.70,2205.06) | 26.07(22.32,30.25) | 3500.98(3005.10,4112.78) | 36.73(31.96,42.40) | 88.29(70.13,108.92) | 40.91(31.71,49.89) | 1.01(0.79,1.23) |
| Albania | 253.08(212.70,295.67) | 11.96(10.16,13.86) | 924.96(805.69,1064.68) | 20.34(17.79,23.27) | 265.48(220.46,325.20) | 70.07(51.38,93.21) | 2.04(1.84,2.23) |
| Algeria | 3390.52(2902.26,3947.18) | 26.43(22.80,30.68) | 15599.82(13633.42,17933.41) | 42.47(37.40,48.30) | 360.10(332.56,390.50) | 60.70(51.49,71.69) | 1.45(1.38,1.52) |
| American Samoa | 5.24(4.43,6.24) | 21.68(18.75,25.00) | 15.66(13.53,18.31) | 30.72(26.75,35.19) | 199.05(167.20,229.16) | 41.69(28.94,55.01) | 1.11(1.03,1.20) |
| Andorra | 13.29(11.39,15.27) | 22.87(19.70,26.12) | 33.98(29.55,38.73) | 22.25(19.30,25.44) | 155.61(132.11,182.51) | -2.71(-11.24,6.90) | 0.01(-0.07,0.08) |
| Angola | 340.69(293.16,398.52) | 8.82(7.74,10.11) | 1474.31(1250.80,1712.46) | 12.51(10.92,14.33) | 332.75(296.95,367.71) | 41.95(31.28,53.27) | 1.10(0.90,1.29) |
| Antigua and Barbuda | 11.12(9.67,12.74) | 21.92(18.81,25.16) | 39.00(33.78,44.21) | 34.49(30.09,38.89) | 250.60(217.01,284.88) | 57.36(42.39,72.70) | 1.52(1.41,1.64) |
| Argentina | 7205.36(6167.50,8364.67) | 22.05(18.95,25.53) | 15868.15(13881.02,17970.08) | 27.76(24.32,31.50) | 120.23(95.52,149.82) | 25.88(12.31,42.21) | 0.87(0.76,0.99) |
| Armenia | 234.26(193.57,282.10) | 8.19(6.96,9.81) | 766.80(657.28,899.54) | 17.31(15.08,20.05) | 227.33(181.04,273.41) | 111.21(86.39,136.52) | 2.79(2.63,2.96) |
| Australia | 5450.89(4883.23,6089.44) | 26.55(23.74,29.61) | 14076.99(12351.61,15833.20) | 30.14(26.42,34.04) | 158.25(131.47,179.90) | 13.52(2.87,22.19) | 0.41(0.35,0.46) |
| Austria | 2721.35(2340.95,3152.60) | 21.78(18.86,25.49) | 5071.45(4452.87,5782.12) | 27.49(24.18,31.36) | 86.36(67.69,105.51) | 26.23(13.67,38.95) | 0.89(0.81,0.97) |
| Azerbaijan | 478.82(396.02,572.68) | 9.03(7.55,10.61) | 2054.07(1705.05,2438.00) | 17.96(15.23,20.86) | 328.99(277.40,387.08) | 98.92(76.62,124.01) | 2.59(2.37,2.80) |
| Bahamas | 31.21(27.26,36.29) | 19.51(17.05,22.44) | 125.08(109.07,143.74) | 28.82(25.27,32.66) | 300.75(268.39,343.08) | 47.75(36.49,62.19) | 1.41(1.30,1.51) |
| Bahrain | 58.12(49.80,67.98) | 31.85(27.59,36.53) | 517.36(438.04,611.84) | 50.04(43.58,56.97) | 790.15(729.20,862.25) | 57.10(48.47,66.95) | 1.41(1.35,1.47) |
| Bangladesh | 4286.01(3670.05,5006.14) | 9.02(7.76,10.41) | 18391.48(15656.17,21277.18) | 12.97(11.11,14.99) | 329.10(298.07,371.61) | 43.79(33.67,57.39) | 1.05(0.93,1.17) |
| Barbados | 52.51(45.96,60.52) | 19.17(16.57,22.19) | 157.36(137.78,180.41) | 30.45(26.59,34.91) | 199.70(172.23,234.04) | 58.80(43.79,75.72) | 1.53(1.42,1.63) |
| Belarus | 972.77(830.84,1123.55) | 7.50(6.40,8.70) | 1941.28(1671.18,2229.39) | 12.27(10.64,14.03) | 99.56(74.55,126.46) | 63.65(44.00,84.84) | 1.63(1.40,1.86) |
| Belgium | 3947.14(3417.04,4547.34) | 24.46(21.19,28.28) | 5952.23(5216.31,6676.25) | 25.08(22.11,28.12) | 50.80(31.36,70.41) | 2.57(-9.92,16.16) | 0.19(0.14,0.23) |
| Belize | 17.81(15.09,20.77) | 18.98(16.09,22.13) | 95.59(81.56,110.41) | 30.15(26.05,34.49) | 436.76(378.53,500.40) | 58.85(42.34,78.88) | 1.46(1.38,1.55) |
| Benin | 264.96(226.90,305.61) | 13.14(11.37,15.05) | 888.85(758.74,1030.73) | 17.14(14.76,19.71) | 235.47(207.90,261.82) | 30.46(19.96,40.30) | 0.81(0.71,0.90) |
| Bermuda | 12.45(10.65,14.40) | 19.54(16.74,22.65) | 42.94(36.99,48.57) | 32.98(28.47,37.40) | 244.83(212.16,283.03) | 68.83(51.79,86.84) | 1.91(1.69,2.12) |
| Bhutan | 31.40(26.02,37.29) | 11.98(10.15,13.97) | 110.65(93.58,128.57) | 17.89(15.23,20.75) | 252.32(222.83,289.25) | 49.39(37.88,62.11) | 1.44(1.37,1.51) |
| Bolivia (Plurinational State of) | 591.59(516.19,680.56) | 18.29(16.02,20.93) | 2493.00(2181.92,2861.53) | 26.91(23.73,30.83) | 321.41(284.10,365.18) | 47.13(34.69,62.13) | 1.42(1.36,1.47) |
| Bosnia and Herzegovina | 512.70(430.12,604.86) | 11.99(10.24,13.95) | 1483.27(1297.17,1695.11) | 23.38(20.45,26.46) | 189.31(157.62,222.03) | 94.94(77.50,113.37) | 2.42(2.23,2.62) |
| Botswana | 85.83(73.85,100.36) | 15.05(13.13,17.21) | 323.01(279.74,373.77) | 21.59(18.95,24.79) | 276.34(252.52,303.26) | 43.47(34.18,53.48) | 1.07(0.86,1.28) |
| Brazil | 17679.35(15797.00,19735.96) | 19.22(17.21,21.41) | 64619.35(59021.74,70002.88) | 25.40(23.21,27.46) | 265.51(237.90,303.80) | 32.17(22.24,44.93) | 0.85(0.79,0.90) |
| Brunei Darussalam | 30.50(26.50,35.01) | 31.79(27.67,36.11) | 117.37(101.12,135.42) | 34.50(30.14,39.12) | 284.81(266.98,307.54) | 8.53(3.78,14.12) | 0.31(0.22,0.40) |
| Bulgaria | 1638.83(1401.85,1924.64) | 12.60(10.85,14.77) | 3163.37(2770.86,3638.41) | 22.34(19.73,25.77) | 93.03(66.09,123.61) | 77.34(56.93,101.19) | 1.88(1.82,1.94) |
| Burkina Faso | 531.70(462.51,609.60) | 12.06(10.55,13.70) | 1481.42(1285.57,1674.53) | 15.86(13.94,17.95) | 178.62(156.52,205.20) | 31.52(21.22,44.49) | 0.95(0.87,1.02) |
| Burundi | 209.29(180.48,239.07) | 9.01(7.80,10.27) | 521.01(445.19,595.70) | 10.90(9.47,12.40) | 148.94(125.74,171.59) | 21.04(10.14,32.63) | 0.54(0.43,0.66) |
| Cabo Verde | 25.33(21.97,28.79) | 10.96(9.47,12.52) | 75.34(63.94,86.52) | 17.32(14.85,19.93) | 197.46(169.89,229.37) | 57.99(43.43,73.40) | 1.54(1.38,1.69) |
| Cambodia | 534.52(448.92,623.73) | 11.46(9.64,13.17) | 2230.45(1884.16,2604.16) | 17.19(14.67,19.98) | 317.28(277.88,359.06) | 50.04(36.98,63.74) | 1.30(1.14,1.45) |
| Cameroon | 771.03(654.88,906.30) | 17.04(14.90,19.43) | 2960.21(2544.68,3406.93) | 22.84(20.14,26.05) | 283.93(249.75,317.51) | 34.06(22.97,45.56) | 0.87(0.75,0.99) |
| Canada | 8206.25(7165.28,9256.08) | 24.46(21.39,27.59) | 18560.00(16177.16,21497.41) | 24.88(21.69,28.69) | 126.17(109.19,145.23) | 1.69(-5.71,10.55) | 0.35(0.24,0.46) |
| Central African Republic | 101.34(86.27,120.13) | 8.78(7.63,10.09) | 248.17(210.99,287.81) | 11.10(9.76,12.54) | 144.88(125.20,166.63) | 26.44(16.29,37.96) | 0.68(0.54,0.82) |
| Chad | 356.92(304.01,415.08) | 12.36(10.58,14.32) | 881.43(758.55,1029.31) | 15.18(13.17,17.39) | 146.95(128.48,166.21) | 22.79(14.14,32.64) | 0.60(0.42,0.77) |
| Chile | 2227.95(1913.12,2576.33) | 22.50(19.35,26.00) | 8699.02(7608.69,9893.41) | 33.42(29.20,37.97) | 290.45(248.70,332.89) | 48.52(32.73,64.19) | 1.54(1.37,1.70) |
| China | 127560.86(112717.78,142654.46) | 15.11(13.45,16.80) | 354156.64(321264.61,382784.00) | 16.29(14.92,17.53) | 177.64(154.79,205.51) | 7.79(-0.19,17.80) | 0.42(0.34,0.50) |
| Colombia | 4334.41(3680.00,5101.16) | 23.77(20.40,27.68) | 17991.01(15654.91,20822.46) | 32.50(28.26,37.41) | 315.07(268.10,376.58) | 36.70(22.13,56.68) | 1.18(1.14,1.22) |
| Comoros | 19.41(16.45,22.35) | 9.87(8.47,11.17) | 59.30(51.62,67.84) | 12.15(10.61,13.90) | 205.54(178.22,237.86) | 23.13(11.99,35.64) | 0.55(0.47,0.63) |
| Congo | 105.12(89.49,122.80) | 9.68(8.38,11.10) | 388.65(329.91,452.54) | 14.21(12.43,16.18) | 269.72(245.62,299.14) | 46.87(36.82,58.33) | 1.19(1.06,1.32) |
| Cook Islands | 2.32(1.99,2.70) | 17.87(15.58,20.58) | 7.49(6.46,8.54) | 28.46(24.68,32.55) | 223.17(194.69,256.97) | 59.26(46.43,73.48) | 1.51(1.41,1.62) |
| Costa Rica | 836.78(757.90,925.18) | 47.42(43.17,52.04) | 2603.12(2352.17,2861.95) | 46.56(42.08,51.12) | 211.09(202.49,219.47) | -1.82(-4.11,0.92) | -0.07(-0.08,-0.06) |
| Côte d'Ivoire | 596.68(488.96,700.47) | 14.78(12.72,16.86) | 2116.07(1781.59,2463.78) | 18.81(16.27,21.34) | 142.16(112.49,177.01) | 73.32(53.41,96.41) | 0.66(0.55,0.78) |
| Croatia | 993.22(840.03,1154.25) | 15.64(13.44,18.02) | 2405.15(2082.39,2701.17) | 27.12(23.51,30.55) | 252.01(216.31,292.95) | 88.02(68.49,110.37) | 2.04(1.87,2.20) |
| Cuba | 1488.45(1272.48,1735.48) | 14.48(12.42,16.93) | 5239.51(4466.87,6051.33) | 27.23(23.19,31.36) | 163.11(131.84,195.33) | 4.62(-5.27,15.23) | 2.23(2.12,2.34) |
| Cyprus | 261.49(223.01,302.97) | 29.71(26.14,34.00) | 688.02(602.08,779.76) | 31.08(27.15,35.14) | 168.18(137.49,203.35) | 71.57(54.08,90.70) | 0.18(0.05,0.31) |
| Czechia | 1814.88(1541.93,2104.96) | 13.06(11.14,15.12) | 4867.22(4225.85,5609.65) | 22.40(19.45,25.85) | 254.64(224.07,293.10) | 27.27(16.67,40.02) | 1.81(1.62,1.99) |
| Democratic People's Republic of Korea | 2157.98(1816.78,2530.09) | 13.40(11.43,15.40) | 5913.97(5119.04,6785.71) | 17.84(15.42,20.50) | 174.05(149.47,198.80) | 33.14(22.72,43.82) | 0.95(0.87,1.03) |
| Democratic Republic of the Congo | 1448.45(1214.34,1694.31) | 9.23(7.96,10.61) | 4495.93(3790.68,5196.31) | 12.35(10.72,14.26) | 210.40(183.15,240.70) | 33.71(22.54,46.15) | 0.87(0.69,1.04) |
| Denmark | 1682.93(1454.30,1953.12) | 19.90(17.25,23.04) | 3014.57(2639.92,3426.47) | 24.15(21.23,27.30) | 79.13(59.81,102.46) | 21.35(9.19,37.67) | 0.77(0.72,0.83) |
| Djibouti | 12.44(10.64,14.53) | 9.46(8.24,10.85) | 79.89(68.93,93.16) | 12.63(11.02,14.49) | 542.06(487.57,601.35) | 33.49(22.36,45.32) | 0.81(0.64,0.97) |
| Dominica | 13.08(11.35,14.97) | 22.26(19.31,25.62) | 26.93(23.13,31.03) | 30.98(26.82,35.42) | 105.99(87.52,123.33) | 39.18(28.12,50.08) | 1.06(0.98,1.15) |
| Dominican Republic | 522.93(448.05,616.14) | 13.57(11.75,15.83) | 2377.29(2028.54,2700.47) | 23.53(20.17,26.80) | 354.61(302.18,405.41) | 73.41(54.57,91.73) | 1.90(1.82,1.98) |
| Ecuador | 976.16(829.28,1123.30) | 18.38(15.55,21.14) | 5929.84(5192.59,6750.03) | 35.84(31.39,40.66) | 507.47(439.94,572.64) | 94.96(74.67,116.01) | 2.49(2.35,2.63) |
| Egypt | 7386.16(6285.19,8695.85) | 26.69(22.94,30.81) | 30039.34(25449.65,35153.15) | 45.02(39.20,51.43) | 306.70(282.21,334.36) | 68.64(59.05,79.24) | 1.61(1.53,1.69) |
| El Salvador | 707.70(597.76,830.49) | 23.35(19.78,27.21) | 2379.46(2089.80,2713.86) | 39.51(34.63,45.09) | 236.22(203.52,271.77) | 69.23(52.59,86.43) | 2.10(1.94,2.25) |
| Equatorial Guinea | 17.47(15.08,20.32) | 9.07(7.92,10.38) | 82.45(71.05,95.07) | 16.28(14.18,18.50) | 372.02(330.38,414.16) | 79.50(64.21,95.20) | 2.20(2.03,2.36) |
| Eritrea | 93.17(78.42,110.20) | 8.47(7.35,9.82) | 302.94(255.83,356.48) | 11.01(9.48,12.84) | 225.16(197.33,254.63) | 30.00(19.72,41.47) | 0.71(0.56,0.86) |
| Estonia | 187.07(156.68,223.77) | 9.12(7.67,10.91) | 501.21(428.64,585.13) | 20.42(17.51,23.86) | 167.93(142.94,199.30) | 123.94(105.45,146.96) | 2.90(2.79,3.02) |
| Eswatini | 53.04(45.32,60.83) | 18.12(15.71,20.79) | 130.55(111.20,148.74) | 22.31(19.27,25.33) | 146.13(126.92,168.24) | 23.17(13.57,34.56) | 0.48(0.25,0.70) |
| Ethiopia | 1764.16(1557.49,1995.85) | 8.97(8.00,9.97) | 4767.50(4275.24,5327.35) | 11.22(10.03,12.53) | 170.24(150.72,192.27) | 25.09(16.30,34.93) | 0.56(0.41,0.72) |
| Fiji | 74.16(62.14,87.17) | 19.42(16.66,22.27) | 211.52(178.74,240.33) | 25.73(22.29,29.18) | 185.21(155.64,219.44) | 32.50(20.37,46.29) | 0.81(0.76,0.86) |
| Finland | 1162.17(983.43,1360.24) | 15.53(13.19,18.04) | 2406.91(2097.04,2774.11) | 17.82(15.63,20.39) | 107.11(85.11,129.40) | 14.76(3.53,25.66) | 0.47(0.40,0.54) |
| France | 18188.96(15690.30,21061.26) | 20.76(17.98,23.88) | 32305.79(28364.94,36777.96) | 22.74(19.99,25.75) | 77.61(59.22,95.47) | 9.53(-0.35,20.07) | 0.33(0.25,0.40) |
| Gabon | 65.79(56.98,76.64) | 11.38(9.93,13.03) | 191.09(166.36,219.17) | 17.97(15.85,20.45) | 190.45(169.94,215.32) | 57.97(47.41,70.32) | 1.42(1.28,1.57) |
| Gambia | 46.77(40.71,54.91) | 13.14(11.63,14.88) | 167.35(146.09,192.84) | 17.09(14.96,19.61) | 257.82(233.16,281.58) | 30.10(21.23,38.85) | 0.80(0.66,0.94) |
| Georgia | 573.00(471.00,680.00) | 8.94(7.46,10.58) | 910.98(776.33,1074.08) | 15.83(13.55,18.49) | 58.98(36.13,84.87) | 77.17(53.58,103.06) | 2.11(1.95,2.27) |
| Germany | 31808.61(27863.34,35858.06) | 24.26(21.27,27.63) | 54022.40(48788.25,60283.89) | 27.67(24.96,30.56) | 69.84(51.92,86.97) | 14.05(2.67,24.43) | 0.44(0.42,0.46) |
| Ghana | 719.04(613.38,845.19) | 11.39(9.85,13.02) | 2727.76(2369.11,3160.57) | 16.11(14.06,18.35) | 279.36(252.78,313.32) | 41.47(31.63,53.04) | 1.12(1.01,1.23) |
| Greece | 4827.23(4197.57,5529.41) | 30.36(26.58,34.83) | 6696.25(6009.11,7570.99) | 28.36(25.26,32.23) | 38.72(26.51,52.68) | -6.58(-14.36,2.31) | -0.13(-0.23,-0.03) |
| Greenland | 5.20(4.44,5.98) | 18.09(15.66,21.03) | 16.08(14.06,18.35) | 23.61(20.64,26.62) | 209.48(181.19,239.00) | 30.54(19.20,43.88) | 1.04(0.97,1.11) |
| Grenada | 14.14(12.27,16.16) | 20.95(18.07,24.12) | 42.91(37.46,48.44) | 35.49(31.09,40.20) | 203.52(173.74,234.22) | 69.41(53.24,86.43) | 1.65(1.54,1.76) |
| Guam | 15.02(12.61,17.78) | 18.20(15.70,20.86) | 53.72(46.46,61.91) | 25.36(22.16,29.07) | 257.64(222.90,293.32) | 39.37(28.19,50.74) | 1.09(1.01,1.17) |
| Guatemala | 926.03(776.01,1084.53) | 25.23(21.60,29.15) | 4391.23(3794.05,5066.11) | 38.86(33.66,44.87) | 374.20(331.49,418.49) | 54.01(41.88,67.85) | 1.54(1.45,1.63) |
| Guinea | 431.96(368.65,501.36) | 12.78(11.06,14.69) | 929.19(809.75,1074.05) | 16.40(14.41,18.85) | 115.11(97.86,136.52) | 28.31(17.75,41.02) | 0.75(0.65,0.85) |
| Guinea-Bissau | 55.44(48.03,63.82) | 13.61(11.95,15.54) | 117.98(100.60,136.86) | 15.92(13.88,18.26) | 112.83(95.96,129.29) | 16.95(7.80,26.40) | 0.44(0.31,0.57) |
| Guyana | 69.77(59.74,80.63) | 17.40(15.01,19.99) | 196.97(167.63,227.97) | 28.56(24.60,32.63) | 182.30(155.22,211.91) | 64.09(49.11,80.14) | 1.57(1.52,1.62) |
| Haiti | 566.07(474.60,677.59) | 16.54(14.03,19.42) | 1670.98(1408.82,1938.54) | 21.78(18.63,25.16) | 195.19(169.23,226.55) | 31.72(20.68,44.85) | 0.92(0.87,0.98) |
| Honduras | 521.19(440.66,612.33) | 24.25(20.60,28.13) | 2140.95(1851.14,2494.13) | 32.01(27.90,37.21) | 310.79(275.62,346.80) | 32.03(20.88,42.92) | 1.02(0.97,1.07) |
| Hungary | 1664.72(1406.99,1951.92) | 11.10(9.37,12.94) | 4530.04(3949.82,5206.90) | 23.08(20.10,26.54) | 172.12(146.18,206.12) | 108.04(90.39,130.47) | 2.53(2.37,2.69) |
| Iceland | 56.34(49.09,65.51) | 19.28(16.86,22.38) | 119.39(104.32,135.96) | 20.29(17.71,23.06) | 111.93(90.88,134.17) | 5.22(-5.03,16.20) | 0.17(0.05,0.29) |
| India | 75873.83(66994.22,84750.71) | 15.28(13.67,16.92) | 222792.55(199078.30,245038.88) | 18.16(16.32,19.97) | 193.64(174.98,214.86) | 18.91(12.07,25.73) | 0.27(0.16,0.38) |
| Indonesia | 11994.88(10583.26,13516.52) | 11.80(10.54,13.17) | 43242.34(38381.73,48503.10) | 17.04(15.27,18.87) | 260.51(234.89,285.48) | 44.46(34.50,54.45) | 1.00(0.82,1.18) |
| Iran (Islamic Republic of) | 8652.77(7576.69,9924.80) | 31.19(27.84,34.80) | 32938.58(30164.27,35878.33) | 41.45(37.83,44.91) | 280.67(244.17,323.34) | 32.88(22.73,45.09) | 0.86(0.81,0.92) |
| Iraq | 2397.82(2047.52,2798.27) | 30.18(26.01,34.98) | 11405.02(9809.24,13190.75) | 45.78(39.99,52.57) | 375.64(338.75,413.42) | 51.70(39.59,63.55) | 1.33(1.19,1.47) |
| Ireland | 1204.23(1074.01,1324.81) | 28.16(25.06,30.96) | 1919.11(1762.64,2071.72) | 23.89(21.89,25.79) | 59.36(51.16,72.21) | -15.16(-19.39,-8.29) | -0.33(-0.39,-0.27) |
| Israel | 1479.19(1280.82,1716.38) | 29.19(25.39,33.76) | 4028.39(3503.19,4629.22) | 32.25(28.08,36.56) | 172.34(141.94,204.98) | 10.46(-1.23,22.86) | 0.43(0.30,0.56) |
| Italy | 20288.58(17952.33,22778.40) | 21.71(19.14,24.37) | 31473.59(28467.13,34606.40) | 20.64(18.63,22.58) | 55.13(43.17,68.73) | -4.94(-10.87,1.71) | 0.01(-0.04,0.06) |
| Jamaica | 352.17(304.45,405.89) | 20.29(17.54,23.48) | 888.93(781.14,1017.72) | 28.97(25.45,33.18) | 152.41(132.91,173.43) | 42.80(32.71,54.64) | 1.23(1.11,1.35) |
| Japan | 52456.02(47493.48,57437.39) | 30.20(27.39,33.06) | 105931.77(95554.31,115892.06) | 30.63(27.88,33.16) | 101.94(87.44,115.43) | 1.42(-3.17,6.22) | 0.07(0.01,0.14) |
| Jordan | 413.56(355.71,476.90) | 30.21(26.44,34.55) | 3764.65(3315.98,4252.35) | 47.76(42.64,53.43) | 810.29(746.53,895.44) | 58.10(47.01,70.89) | 1.54(1.47,1.60) |
| Kazakhstan | 1094.72(914.41,1290.32) | 8.21(6.91,9.63) | 3221.88(2683.93,3757.80) | 16.65(14.00,19.32) | 194.31(170.85,222.75) | 102.67(88.01,119.08) | 2.48(2.26,2.69) |
| Kenya | 722.18(647.33,803.91) | 8.93(8.03,9.83) | 2578.76(2295.91,2863.71) | 11.29(10.14,12.48) | 257.08(241.91,273.30) | 26.54(20.70,32.50) | 0.49(0.29,0.68) |
| Kiribati | 5.60(4.70,6.74) | 13.94(11.95,16.24) | 15.07(12.78,17.55) | 19.16(16.55,21.93) | 169.12(144.89,196.34) | 37.49(26.26,49.79) | 0.99(0.93,1.06) |
| Kuwait | 204.35(174.22,238.59) | 31.56(27.23,35.67) | 1285.55(1106.98,1491.24) | 42.56(37.03,48.62) | 529.09(479.51,581.48) | 34.87(25.54,44.81) | 1.10(1.00,1.20) |
| Kyrgyzstan | 245.81(204.62,295.84) | 7.75(6.54,9.14) | 657.32(545.08,783.78) | 12.24(10.24,14.38) | 167.41(147.10,188.81) | 57.92(45.31,70.63) | 1.52(1.35,1.69) |
| Lao People's Democratic Republic | 347.22(296.48,408.46) | 16.02(13.84,18.63) | 1065.75(904.92,1229.66) | 21.89(18.82,25.17) | 206.94(177.65,239.29) | 36.62(23.91,50.59) | 1.02(0.91,1.12) |
| Latvia | 272.13(233.02,321.92) | 7.63(6.54,9.04) | 547.04(472.18,626.38) | 15.11(13.02,17.54) | 101.02(81.91,120.70) | 98.07(81.98,116.06) | 2.21(2.05,2.36) |
| Lebanon | 616.07(529.95,717.21) | 27.68(24.26,31.75) | 2641.78(2329.32,2967.11) | 45.53(39.95,51.60) | 328.81(294.93,370.68) | 64.47(54.75,75.68) | 1.62(1.54,1.69) |
| Lesotho | 122.27(103.98,139.57) | 14.30(12.23,16.26) | 212.96(181.68,244.28) | 19.05(16.48,21.54) | 74.18(60.89,88.47) | 33.16(23.21,43.74) | 0.74(0.49,0.99) |
| Liberia | 151.95(129.03,176.93) | 12.74(10.94,14.71) | 364.33(308.90,422.10) | 17.31(14.98,19.57) | 139.77(116.59,163.88) | 35.89(23.56,49.32) | 1.16(1.06,1.25) |
| Libya | 520.46(442.81,603.67) | 27.32(23.44,31.69) | 2289.46(1967.16,2656.30) | 43.22(37.37,49.49) | 339.89(312.76,367.18) | 58.21(48.73,68.33) | 1.29(1.15,1.43) |
| Lithuania | 390.55(333.07,457.19) | 8.66(7.38,10.13) | 694.40(603.61,791.68) | 13.18(11.51,15.07) | 77.80(55.17,102.87) | 52.15(34.19,73.05) | 1.43(1.26,1.60) |
| Luxembourg | 141.48(122.64,162.79) | 24.70(21.39,28.28) | 283.85(245.88,317.76) | 26.87(23.19,30.25) | 100.63(81.66,121.50) | 8.78(-1.88,19.89) | 0.40(0.28,0.52) |
| Madagascar | 409.75(353.04,477.51) | 8.16(7.15,9.34) | 1140.68(983.56,1337.26) | 10.26(8.95,11.74) | 178.38(158.11,199.70) | 25.68(15.66,34.90) | 0.68(0.53,0.82) |
| Malawi | 346.00(296.80,400.36) | 9.18(7.97,10.55) | 855.57(737.71,979.19) | 11.81(10.26,13.45) | 147.28(123.77,171.67) | 28.67(16.85,40.41) | 0.77(0.63,0.91) |
| Malaysia | 1674.79(1430.11,1942.19) | 17.76(15.36,20.40) | 7810.97(6815.17,8935.51) | 26.25(23.01,29.97) | 366.39(322.33,417.19) | 47.80(34.57,64.08) | 1.29(1.24,1.34) |
| Maldives | 18.07(15.20,21.45) | 19.18(16.55,22.29) | 104.18(90.03,120.89) | 30.23(26.24,34.91) | 476.60(407.52,553.11) | 57.63(39.26,78.53) | 1.58(1.45,1.71) |
| Mali | 485.62(412.59,566.58) | 12.00(10.34,13.67) | 1380.02(1178.39,1601.03) | 15.45(13.34,17.74) | 184.18(160.14,209.59) | 28.72(18.30,39.63) | 0.80(0.71,0.90) |
| Malta | 112.86(97.98,130.47) | 25.84(22.50,29.69) | 278.84(244.43,315.02) | 27.06(23.72,30.27) | 147.06(124.57,170.35) | 4.72(-3.76,12.76) | 0.18(0.10,0.25) |
| Marshall Islands | 2.82(2.36,3.32) | 16.07(13.77,18.55) | 8.89(7.60,10.43) | 23.36(20.26,26.43) | 215.09(189.03,243.69) | 45.39(34.33,56.58) | 1.12(1.06,1.19) |
| Mauritania | 143.72(122.79,167.59) | 13.93(12.01,16.16) | 422.51(361.78,490.28) | 19.23(16.58,22.20) | 193.97(172.68,221.57) | 38.01(27.81,50.74) | 1.04(0.93,1.16) |
| Mauritius | 196.22(165.24,229.81) | 25.44(21.61,29.44) | 787.60(681.72,900.28) | 40.12(35.01,45.50) | 301.39(248.37,356.37) | 57.74(39.37,76.42) | 1.57(1.50,1.65) |
| Mexico | 13926.74(12390.70,15710.68) | 31.25(27.98,35.06) | 61209.74(56685.91,65362.73) | 46.24(42.93,49.43) | 339.51(295.94,387.35) | 47.95(33.85,63.56) | 1.36(1.27,1.44) |
| Micronesia (Federated States of) | 9.05(7.71,10.70) | 17.72(15.23,20.82) | 22.17(18.56,26.14) | 27.23(23.36,31.20) | 145.00(117.69,171.92) | 53.65(39.94,67.95) | 1.36(1.30,1.42) |
| Monaco | 15.45(13.36,17.88) | 20.65(17.79,23.87) | 22.90(20.10,26.15) | 22.65(19.89,25.73) | 48.24(34.91,62.13) | 9.70(-0.23,19.52) | 0.40(0.36,0.43) |
| Mongolia | 135.30(111.75,159.08) | 12.02(10.03,14.11) | 424.68(348.61,493.05) | 16.30(13.72,18.66) | 213.88(181.18,253.16) | 35.55(21.37,52.58) | 0.94(0.86,1.01) |
| Montenegro | 116.28(100.03,135.53) | 18.43(15.94,21.51) | 285.41(246.23,330.43) | 27.71(24.05,31.73) | 145.44(119.87,176.98) | 50.38(36.94,67.68) | 1.51(1.44,1.58) |
| Morocco | 3081.64(2675.64,3557.14) | 21.54(18.68,24.75) | 14044.36(12220.59,16083.13) | 39.84(34.81,45.23) | 355.74(318.46,391.54) | 84.96(70.57,99.18) | 1.97(1.81,2.14) |
| Mozambique | 516.41(438.77,596.95) | 8.87(7.62,10.23) | 1222.62(1045.71,1427.66) | 11.22(9.76,12.95) | 136.75(113.89,162.37) | 26.51(14.19,40.71) | 0.65(0.48,0.82) |
| Myanmar | 3522.85(3020.11,4123.33) | 14.66(12.70,16.84) | 10655.36(9207.22,12091.48) | 21.04(18.28,23.87) | 202.46(173.90,236.22) | 43.51(30.62,57.77) | 1.18(1.02,1.34) |
| Namibia | 101.16(87.21,119.90) | 15.28(13.39,17.63) | 276.84(240.08,324.46) | 19.79(17.33,22.88) | 173.67(157.30,192.57) | 29.52(21.97,37.74) | 0.75(0.55,0.96) |
| Nauru | 0.87(0.72,1.03) | 17.74(15.30,20.55) | 1.49(1.25,1.73) | 24.02(20.76,27.69) | 71.42(57.81,85.09) | 35.45(25.59,46.09) | 0.91(0.81,1.01) |
| Nepal | 1222.44(1042.42,1449.26) | 12.26(10.56,14.27) | 5030.34(4314.03,5816.98) | 20.45(17.67,23.42) | 311.50(281.82,345.82) | 66.79(56.21,78.71) | 1.47(1.39,1.55) |
| Netherlands | 4458.41(3939.53,5037.09) | 21.23(18.89,23.95) | 9025.41(7866.10,10060.53) | 24.21(21.16,26.90) | 102.44(80.43,126.32) | 14.03(2.26,27.40) | 0.59(0.53,0.66) |
| New Zealand | 1111.57(980.80,1284.06) | 27.16(24.08,31.30) | 2695.43(2380.40,3046.23) | 31.10(27.60,35.22) | 142.49(119.97,174.31) | 14.50(4.22,28.69) | 0.48(0.42,0.53) |
| Nicaragua | 470.53(399.54,558.81) | 28.35(24.27,33.05) | 2230.57(1915.77,2564.89) | 42.59(36.71,48.62) | 374.06(329.81,427.97) | 50.23(36.26,67.00) | 1.34(1.28,1.39) |
| Niger | 339.30(284.15,394.33) | 12.14(10.48,13.81) | 1238.41(1054.02,1443.15) | 14.75(12.70,16.99) | 264.99(233.40,300.72) | 21.47(10.58,32.72) | 0.64(0.57,0.71) |
| Nigeria | 5778.78(5144.49,6466.13) | 12.98(11.61,14.46) | 15856.44(14145.83,17502.98) | 17.43(15.54,19.26) | 174.39(160.20,190.12) | 34.33(27.03,41.62) | 0.93(0.78,1.09) |
| Niue | 0.39(0.33,0.44) | 17.98(15.26,20.76) | 0.60(0.51,0.70) | 27.07(22.93,31.28) | 56.71(43.06,70.95) | 50.52(37.99,62.45) | 1.29(1.23,1.35) |
| North Macedonia | 262.59(227.74,305.01) | 13.65(11.90,15.70) | 958.83(829.59,1097.18) | 26.83(23.31,30.44) | 265.15(225.92,307.23) | 96.62(76.66,117.09) | 2.36(2.13,2.59) |
| Northern Mariana Islands | 4.94(4.08,6.02) | 24.52(21.04,28.63) | 19.83(16.76,23.97) | 33.77(28.89,39.77) | 301.55(242.46,386.54) | 37.76(25.18,58.55) | 0.85(0.71,1.00) |
| Norway | 1308.62(1152.56,1491.78) | 17.90(15.93,20.09) | 2125.86(1911.81,2349.48) | 20.36(18.45,22.37) | 62.45(44.87,84.56) | 13.78(1.49,28.09) | 0.51(0.48,0.54) |
| Oman | 151.39(130.81,172.76) | 22.70(19.73,25.91) | 865.30(745.27,986.34) | 42.61(37.37,48.21) | 471.56(434.54,512.77) | 87.72(75.78,100.61) | 1.97(1.77,2.17) |
| Pakistan | 7999.22(7093.68,9017.00) | 13.68(12.14,15.40) | 21609.34(19072.68,24237.71) | 16.82(14.96,18.78) | 170.14(153.55,188.35) | 22.93(15.00,31.42) | 0.80(0.76,0.84) |
| Palau | 2.16(1.80,2.59) | 20.91(17.55,24.56) | 8.64(7.41,10.17) | 34.19(29.89,39.45) | 299.64(247.97,361.63) | 63.47(45.11,87.45) | 1.58(1.43,1.73) |
| Palestine | 261.70(224.01,307.07) | 29.58(25.76,34.39) | 1189.20(1030.34,1371.65) | 45.19(39.94,51.33) | 354.42(321.27,390.30) | 52.76(42.12,64.98) | 1.26(1.14,1.38) |
| Panama | 386.55(328.63,452.72) | 25.45(21.65,29.69) | 1644.10(1433.52,1862.05) | 37.35(32.54,42.32) | 325.33(278.62,382.61) | 46.78(30.83,67.27) | 1.33(1.28,1.37) |
| Papua New Guinea | 176.15(144.97,214.61) | 9.02(7.66,10.58) | 645.64(537.02,759.68) | 11.93(10.11,13.87) | 266.53(215.68,318.68) | 32.18(14.59,50.67) | 0.88(0.70,1.06) |
| Paraguay | 444.04(384.20,508.82) | 19.70(17.14,22.55) | 1863.60(1639.11,2126.99) | 31.22(27.64,35.47) | 319.69(269.42,369.30) | 58.48(40.52,77.24) | 1.55(1.48,1.62) |
| Peru | 1780.87(1513.01,2056.79) | 15.01(12.78,17.38) | 9584.98(8189.14,10937.41) | 28.91(24.66,33.15) | 438.22(386.31,503.08) | 92.64(74.36,114.92) | 2.44(2.34,2.54) |
| Philippines | 5489.60(4946.56,6021.39) | 17.99(16.27,19.76) | 22328.12(20227.54,24216.91) | 25.73(23.55,27.82) | 306.73(280.46,332.86) | 43.01(34.77,52.23) | 1.11(1.07,1.15) |
| Poland | 6543.89(5684.45,7484.17) | 14.69(12.78,16.80) | 14663.21(12969.29,16659.50) | 20.19(18.05,22.63) | 124.07(102.00,150.14) | 37.46(24.24,52.18) | 0.36(0.13,0.58) |
| Portugal | 3175.85(2691.83,3739.45) | 21.74(18.53,25.28) | 6150.73(5350.50,7184.07) | 24.15(20.89,28.01) | 93.67(74.87,112.83) | 11.07(1.88,20.94) | 0.46(0.39,0.52) |
| Puerto Rico | 847.95(733.90,986.35) | 23.30(20.09,27.12) | 2271.19(1987.29,2587.00) | 35.84(31.61,40.52) | 167.84(139.41,204.56) | 53.84(38.67,72.92) | 1.50(1.30,1.70) |
| Qatar | 40.38(34.35,47.75) | 32.96(28.12,38.55) | 586.56(497.04,689.33) | 53.08(46.26,60.12) | 1352.72(1258.42,1463.21) | 61.07(49.44,73.03) | 1.39(1.30,1.47) |
| Republic of Korea | 6234.12(5344.12,7362.99) | 22.00(18.99,25.77) | 24486.90(21865.75,27473.47) | 25.36(22.69,28.38) | 292.79(248.11,344.86) | 15.31(3.07,28.59) | 0.54(0.43,0.66) |
| Republic of Moldova | 269.14(230.12,318.19) | 6.05(5.22,7.09) | 640.01(538.44,763.19) | 10.90(9.27,12.97) | 137.80(119.00,162.06) | 80.15(65.82,96.22) | 1.77(1.55,2.00) |
| Romania | 3174.00(2710.25,3711.69) | 11.04(9.51,12.84) | 7845.31(6892.87,8836.84) | 21.36(18.93,23.89) | 147.17(120.54,181.18) | 93.41(75.53,115.81) | 2.22(2.02,2.42) |
| Russian Federation | 17141.62(15089.08,19302.08) | 9.41(8.37,10.51) | 40190.14(36170.60,44621.85) | 17.17(15.51,18.82) | 134.46(119.65,148.79) | 82.40(73.24,90.99) | 2.00(1.94,2.06) |
| Rwanda | 251.41(213.74,296.67) | 8.99(7.80,10.44) | 717.34(614.59,837.27) | 11.51(10.02,13.30) | 185.32(157.02,217.82) | 28.10(16.49,42.22) | 0.80(0.66,0.93) |
| Saint Kitts and Nevis | 8.18(7.00,9.38) | 22.24(18.98,25.30) | 26.64(22.94,30.90) | 34.48(30.14,39.79) | 225.71(188.10,267.62) | 55.01(40.73,73.23) | 1.49(1.33,1.66) |
| Saint Lucia | 17.81(15.32,20.53) | 19.95(17.32,22.91) | 76.13(66.29,87.53) | 30.98(26.97,35.69) | 327.56(287.73,369.91) | 55.34(41.64,71.50) | 1.39(1.26,1.52) |
| Saint Vincent and the Grenadines | 13.34(11.50,15.37) | 18.51(15.97,21.28) | 42.21(36.76,47.89) | 28.66(24.98,32.44) | 216.44(187.49,248.69) | 54.82(40.98,69.93) | 1.43(1.34,1.53) |
| Samoa | 16.83(14.16,19.81) | 18.83(16.07,22.04) | 39.56(34.00,46.10) | 26.31(22.88,30.39) | 135.11(115.79,157.66) | 39.77(29.18,51.67) | 1.02(0.98,1.06) |
| San Marino | 7.11(6.16,8.17) | 19.27(16.75,22.01) | 15.35(13.33,17.67) | 20.47(17.70,23.58) | 115.97(96.55,138.40) | 6.23(-2.73,16.63) | 0.25(0.20,0.31) |
| Sao Tome and Principe | 10.07(8.53,11.80) | 15.23(13.08,17.79) | 25.53(21.95,29.60) | 22.57(19.80,25.82) | 153.65(131.81,181.79) | 48.13(34.51,65.17) | 1.33(1.23,1.42) |
| Saudi Arabia | 1896.93(1657.88,2203.61) | 31.37(27.52,35.60) | 11475.06(9984.77,13127.32) | 52.80(47.08,58.92) | 504.93(456.52,565.06) | 68.30(54.23,82.61) | 1.59(1.46,1.72) |
| Senegal | 434.63(377.18,501.90) | 13.27(11.61,15.00) | 1302.98(1128.12,1496.77) | 16.68(14.64,18.97) | 199.79(180.55,225.14) | 25.69(17.31,36.20) | 0.67(0.63,0.70) |
| Serbia | 1698.47(1454.64,1953.83) | 14.01(12.24,15.91) | 4314.03(3741.37,4963.76) | 25.78(22.45,29.38) | 154.00(128.85,187.41) | 83.98(70.52,100.56) | 2.28(2.14,2.42) |
| Seychelles | 12.51(10.83,14.26) | 22.04(19.08,25.04) | 39.62(34.27,45.50) | 32.25(28.20,36.81) | 216.61(183.73,253.02) | 46.30(31.51,62.71) | 1.20(1.09,1.32) |
| Sierra Leone | 254.95(217.44,294.05) | 12.22(10.45,14.00) | 592.76(508.33,668.85) | 15.64(13.58,17.62) | 132.50(113.03,153.25) | 27.98(16.94,39.87) | 0.78(0.60,0.95) |
| Singapore | 596.63(538.33,659.84) | 27.39(24.78,30.14) | 2775.66(2452.79,3157.71) | 31.83(28.40,36.05) | 365.23(326.97,411.58) | 16.19(7.44,26.50) | 0.61(0.54,0.67) |
| Slovakia | 862.36(736.41,995.63) | 14.24(12.19,16.45) | 2242.68(1945.01,2548.91) | 23.00(19.96,26.03) | 160.06(132.81,197.36) | 61.52(45.51,82.49) | 1.55(1.47,1.62) |
| Slovenia | 317.52(272.54,369.20) | 12.87(11.05,14.95) | 1000.23(854.07,1145.12) | 22.91(19.64,26.11) | 215.01(178.26,263.78) | 78.05(57.83,103.02) | 1.98(1.80,2.15) |
| Solomon Islands | 21.26(17.33,25.61) | 13.88(11.82,16.18) | 56.60(47.80,66.58) | 15.17(13.07,17.39) | 166.30(141.65,189.90) | 9.30(-0.76,19.02) | 0.04(-0.11,0.20) |
| Somalia | 208.24(176.15,242.00) | 9.18(7.98,10.46) | 635.18(538.80,739.23) | 10.61(9.16,12.05) | 205.02(176.29,235.89) | 15.62(5.22,26.92) | 0.36(0.24,0.47) |
| South Africa | 3492.16(3122.04,3890.77) | 16.83(15.11,18.69) | 11518.50(10408.88,12561.36) | 24.33(21.97,26.45) | 229.84(210.06,250.40) | 44.59(36.15,53.36) | 1.12(0.99,1.26) |
| South Sudan | 252.49(218.57,292.40) | 9.80(8.57,11.26) | 441.36(379.07,510.73) | 11.82(10.21,13.62) | 74.80(58.35,91.03) | 20.59(11.12,30.04) | 0.49(0.38,0.60) |
| Spain | 14143.02(12447.66,16110.67) | 24.71(21.86,27.98) | 23657.91(20872.23,26718.09) | 23.64(20.90,26.67) | 67.28(51.01,83.81) | -4.33(-13.49,5.14) | -0.03(-0.10,0.05) |
| Sri Lanka | 2127.87(1848.71,2471.24) | 19.22(16.76,22.18) | 8187.11(7001.85,9321.55) | 28.58(24.54,32.40) | 284.76(247.46,323.51) | 48.72(34.34,62.85) | 1.35(1.30,1.41) |
| Sudan | 2111.58(1796.83,2461.48) | 22.47(19.24,25.88) | 6793.22(5910.40,7802.00) | 34.98(30.58,39.62) | 221.71(196.96,246.95) | 55.68(44.37,67.77) | 1.36(1.12,1.60) |
| Suriname | 50.16(42.76,57.99) | 18.75(16.05,21.49) | 195.50(168.42,224.96) | 29.71(25.78,34.16) | 289.75(246.49,334.92) | 58.46(41.52,76.82) | 1.63(1.54,1.72) |
| Sweden | 2855.53(2476.90,3294.99) | 17.50(15.20,20.09) | 3891.48(3355.21,4465.64) | 17.30(15.10,19.57) | 36.28(24.39,47.94) | -1.14(-9.64,6.53) | 0.09(0.04,0.14) |
| Switzerland | 2618.63(2283.75,2985.55) | 24.20(21.17,27.53) | 4890.76(4216.93,5593.54) | 26.40(22.58,30.40) | 86.77(68.87,107.45) | 9.07(-1.58,21.38) | 0.38(0.30,0.45) |
| Syrian Arab Republic | 1431.27(1207.33,1673.42) | 27.06(23.25,31.37) | 5883.42(5170.10,6684.43) | 42.10(37.44,47.25) | 311.06(265.45,359.39) | 55.57(39.56,72.42) | 1.38(1.29,1.47) |
| Taiwan | 4573.67(4086.59,5121.08) | 28.00(25.17,31.08) | 13540.31(12193.73,15028.09) | 31.39(28.35,34.68) | 196.05(171.90,224.31) | 12.08(3.24,21.92) | 0.34(0.26,0.42) |
| Tajikistan | 185.76(155.88,223.35) | 6.49(5.49,7.72) | 711.09(595.97,845.86) | 11.41(9.76,13.14) | 282.81(242.88,322.10) | 75.74(57.95,94.03) | 2.17(1.92,2.42) |
| Thailand | 7608.18(6472.14,8794.82) | 20.68(17.77,23.73) | 34553.37(30206.79,39094.88) | 30.95(27.18,34.85) | 354.16(307.46,411.06) | 49.70(35.40,66.34) | 1.24(1.11,1.36) |
| Timor-Leste | 42.67(35.90,50.86) | 14.44(12.30,16.68) | 176.09(152.76,205.28) | 19.83(17.25,22.93) | 312.68(271.82,365.12) | 37.30(26.90,49.30) | 1.12(0.99,1.24) |
| Togo | 162.66(140.05,192.74) | 13.08(11.29,15.12) | 648.20(556.54,755.04) | 16.73(14.50,19.43) | 298.49(265.48,333.30) | 27.91(17.17,39.48) | 0.67(0.51,0.82) |
| Tokelau | 0.21(0.18,0.24) | 15.20(13.07,17.75) | 0.36(0.31,0.42) | 24.11(20.84,27.96) | 73.51(60.46,87.60) | 58.61(47.62,70.44) | 1.44(1.36,1.51) |
| Tonga | 10.60(9.05,12.52) | 18.28(15.80,21.16) | 21.11(18.31,24.19) | 25.96(22.58,29.66) | 99.20(83.25,118.18) | 41.98(31.42,54.83) | 1.08(1.03,1.12) |
| Trinidad and Tobago | 157.80(136.53,181.35) | 18.31(15.88,21.06) | 610.58(535.78,696.87) | 30.69(27.10,34.73) | 286.92(241.62,332.27) | 67.63(49.00,86.14) | 1.81(1.71,1.91) |
| Tunisia | 1359.99(1176.07,1565.88) | 26.28(22.96,30.17) | 5852.17(5121.39,6676.80) | 42.62(37.57,48.49) | 330.31(295.28,371.06) | 62.22(50.53,76.49) | 1.48(1.38,1.58) |
| Türkiye | 7820.05(6937.93,8867.99) | 22.92(20.50,25.77) | 41373.95(36218.89,47068.12) | 42.69(37.59,48.08) | 237.86(196.30,284.60) | 58.27(39.84,79.85) | 1.98(1.91,2.05) |
| Turkmenistan | 190.31(159.58,228.81) | 9.12(7.78,10.83) | 642.99(547.90,756.79) | 14.43(12.37,16.78) | 152.72(132.69,176.12) | 63.51(51.72,77.74) | 1.64(1.46,1.83) |
| Tuvalu | 1.00(0.84,1.19) | 14.10(12.05,16.58) | 2.52(2.14,2.92) | 23.05(19.78,26.49) | 429.07(371.84,488.32) | 86.20(67.75,105.84) | 1.55(1.50,1.59) |
| Uganda | 543.34(472.97,624.49) | 8.60(7.53,9.85) | 1480.39(1258.41,1690.42) | 10.43(9.01,11.87) | 172.46(150.74,197.41) | 21.30(11.18,32.50) | 0.50(0.33,0.68) |
| Ukraine | 5039.05(4249.29,5979.57) | 7.03(5.98,8.36) | 7825.14(6795.73,9052.91) | 10.31(8.93,11.87) | 55.29(38.15,76.22) | 46.50(31.76,63.57) | 1.23(1.13,1.34) |
| United Arab Emirates | 171.67(146.19,206.21) | 35.20(30.73,40.61) | 3007.88(2555.18,3635.47) | 51.84(45.85,58.70) | 1652.16(1510.35,1797.29) | 47.28(38.72,55.93) | 1.06(0.94,1.18) |
| United Kingdom | 20115.35(18085.67,22686.59) | 20.86(18.81,23.19) | 30215.18(27274.55,33283.68) | 22.43(20.29,24.64) | 50.21(39.79,61.10) | 7.55(0.65,14.98) | -0.01(-0.11,0.10) |
| United Republic of Tanzania | 1070.25(916.87,1234.52) | 9.89(8.54,11.39) | 3091.71(2686.90,3531.15) | 12.44(10.83,14.12) | 188.88(163.88,217.32) | 25.72(15.01,38.00) | 0.63(0.53,0.74) |
| United States of America | 99640.99(89218.36,110736.13) | 30.61(27.37,33.79) | 198284.18(180728.56,216563.91) | 33.28(30.52,36.21) | 99.00(84.08,117.34) | 8.73(0.62,18.58) | 0.15(0.06,0.24) |
| United States Virgin Islands | 18.07(15.41,21.25) | 20.11(17.26,23.34) | 56.15(48.31,64.00) | 31.28(26.96,36.03) | 210.77(180.88,243.77) | 55.55(43.44,66.93) | 1.49(1.36,1.61) |
| Uruguay | 810.66(702.17,924.67) | 20.03(17.44,22.77) | 1359.13(1196.60,1535.35) | 24.09(21.28,27.26) | 67.66(48.91,87.01) | 20.27(7.91,34.23) | 0.70(0.64,0.75) |
| Uzbekistan | 1418.58(1170.58,1693.03) | 11.69(9.76,13.92) | 5138.45(4246.46,6104.59) | 17.65(14.82,20.40) | 262.23(233.45,296.92) | 50.99(41.38,62.71) | 1.36(1.21,1.50) |
| Vanuatu | 9.26(7.76,10.89) | 13.90(11.91,15.98) | 37.65(31.49,43.26) | 20.40(17.43,23.26) | 306.42(278.85,341.15) | 46.77(37.16,58.38) | 1.15(1.08,1.23) |
| Venezuela (Bolivarian Republic of) | 2593.68(2230.18,3046.96) | 25.63(22.04,29.82) | 11928.84(10452.63,13491.45) | 38.12(33.47,42.87) | 359.92(310.96,415.85) | 48.72(32.79,67.19) | 1.44(1.33,1.55) |
| Viet Nam | 5308.32(4548.12,6107.87) | 13.04(11.27,14.98) | 21256.01(18212.09,24657.32) | 20.90(18.16,24.02) | 300.43(263.68,344.57) | 60.24(46.04,77.04) | 1.76(1.69,1.82) |
| Yemen | 1068.31(895.01,1251.93) | 21.59(18.24,25.08) | 4383.53(3762.64,5034.47) | 31.24(27.06,35.80) | 310.32(272.98,352.12) | 44.70(32.43,58.46) | 1.18(0.95,1.42) |
| Zambia | 300.38(257.08,344.94) | 10.65(9.30,12.06) | 914.67(779.64,1053.89) | 13.38(11.56,15.30) | 204.51(178.34,233.12) | 25.61(14.19,39.07) | 0.67(0.49,0.85) |
| Zimbabwe | 667.72(575.79,776.68) | 16.09(13.95,18.50) | 1311.78(1139.50,1502.96) | 18.60(16.20,21.10) | 96.46(83.69,109.82) | 15.60(8.18,23.17) | 0.18(-0.03,0.40) |

**Table S6. Mortality of Chronic kidney disease due to diabetes mellitus type 2 Between 1990 and 2021 at 204 Countries and Territories.**

| **Location** | **1990** | | **2021** | | **Percentage change in number between 1990 and 2021** | **Percentage change in ASR between 1990 and 2021** | **EAPC** |
| --- | --- | --- | --- | --- | --- | --- | --- |
| **Number** | **ASR** | **Number** | **ASR** |
| Afghanistan | 594.96(396.77,944.97) | 9.37(6.27,15.06) | 851.35(445.78,1547.33) | 10.87(5.78,19.82) | 43.09(-15.53,123.65) | 16.04(-31.31,78.45) | 0.53(0.49,0.58) |
| Albania | 21.21(14.88,30.07) | 1.23(0.86,1.76) | 49.17(33.37,73.82) | 1.15(0.79,1.68) | 131.80(62.73,221.25) | -6.55(-34.19,28.12) | 0.30(0.04,0.57) |
| Algeria | 491.68(303.15,871.90) | 5.84(3.65,10.84) | 2182.12(1584.54,2940.53) | 8.12(5.99,10.90) | 343.81(152.15,582.19) | 39.02(-24.18,111.14) | 1.52(1.31,1.73) |
| American Samoa | 3.97(2.82,5.68) | 23.70(17.05,34.35) | 20.83(16.01,26.09) | 51.89(39.96,64.70) | 424.88(220.51,728.03) | 118.98(35.28,240.95) | 2.75(2.50,2.99) |
| Andorra | 0.94(0.61,1.43) | 2.07(1.38,3.12) | 2.94(1.90,4.42) | 1.64(1.07,2.45) | 212.03(97.19,383.64) | -20.82(-46.03,15.91) | -0.41(-0.65,-0.18) |
| Angola | 187.68(127.22,271.54) | 6.53(4.57,9.11) | 597.49(395.90,858.80) | 7.15(4.81,10.35) | 218.35(119.64,352.44) | 9.62(-21.38,48.30) | 0.16(0.04,0.28) |
| Antigua and Barbuda | 7.61(6.53,8.95) | 13.43(11.57,15.82) | 21.46(18.51,24.93) | 22.18(19.09,25.85) | 181.99(149.10,215.76) | 65.14(47.35,84.86) | 2.19(1.92,2.46) |
| Argentina | 1893.04(1467.48,2366.45) | 6.17(4.84,7.64) | 3320.99(2595.21,4174.30) | 5.69(4.45,7.11) | 75.43(58.65,94.65) | -7.83(-15.31,0.15) | -0.07(-0.40,0.26) |
| Armenia | 3.11(2.28,4.08) | 0.12(0.09,0.16) | 68.71(49.03,92.68) | 1.58(1.13,2.13) | 2112.83(1527.73,2968.43) | 1172.82(864.35,1685.66) | 7.80(6.50,9.12) |
| Australia | 80.05(62.58,102.53) | 0.45(0.34,0.58) | 389.97(277.76,540.52) | 0.73(0.53,1.00) | 387.15(306.30,486.28) | 64.07(38.43,95.31) | 2.67(2.14,3.21) |
| Austria | 146.20(110.49,189.31) | 1.16(0.90,1.48) | 662.25(509.22,817.04) | 2.78(2.20,3.41) | 352.97(266.85,477.18) | 139.27(100.85,197.29) | 4.18(3.45,4.91) |
| Azerbaijan | 39.69(27.54,56.73) | 0.84(0.58,1.19) | 140.52(95.60,198.79) | 1.53(1.04,2.15) | 254.03(148.96,421.97) | 82.92(29.18,162.63) | 2.36(2.03,2.69) |
| Bahamas | 13.87(11.80,16.15) | 9.74(8.34,11.27) | 60.35(48.34,75.84) | 16.38(13.29,20.37) | 335.19(252.75,448.37) | 68.10(37.48,110.53) | 2.28(2.01,2.55) |
| Bahrain | 9.91(6.59,14.33) | 9.09(6.09,13.00) | 55.29(39.89,77.01) | 11.25(8.02,15.92) | 458.04(265.20,754.59) | 23.75(-22.09,90.77) | 0.27(-0.15,0.68) |
| Bangladesh | 1661.48(1271.16,2395.89) | 3.96(3.06,5.62) | 4498.93(3293.50,6445.53) | 3.71(2.74,5.15) | 170.78(99.19,259.43) | -6.21(-31.65,24.61) | -0.17(-0.46,0.13) |
| Barbados | 28.90(24.96,33.01) | 9.32(8.15,10.57) | 73.02(55.52,92.72) | 13.85(10.53,17.52) | 152.66(97.34,208.33) | 48.58(17.49,82.44) | 1.79(1.46,2.11) |
| Belarus | 9.35(6.86,12.40) | 0.08(0.06,0.10) | 41.79(29.99,58.16) | 0.25(0.18,0.35) | 347.16(262.18,446.25) | 234.30(173.24,308.48) | 3.95(3.13,4.78) |
| Belgium | 239.64(178.36,316.58) | 1.48(1.11,1.92) | 470.30(330.80,650.43) | 1.51(1.08,2.02) | 96.25(61.84,133.36) | 1.93(-10.56,13.87) | 0.90(0.49,1.31) |
| Belize | 9.74(8.49,11.23) | 10.72(9.33,12.37) | 54.38(45.11,64.48) | 20.27(16.99,23.80) | 458.14(377.44,536.96) | 89.00(61.48,115.07) | 2.54(2.02,3.07) |
| Benin | 90.93(66.43,123.04) | 5.21(3.88,6.99) | 234.21(167.58,325.42) | 5.76(4.15,8.13) | 157.56(99.48,229.84) | 10.64(-14.48,38.96) | 0.26(0.14,0.37) |
| Bermuda | 4.20(3.65,4.85) | 7.18(6.26,8.29) | 11.22(8.93,14.22) | 7.40(5.90,9.40) | 167.22(123.27,223.43) | 2.96(-13.71,24.57) | 0.57(0.24,0.90) |
| Bhutan | 10.64(7.23,16.16) | 5.25(3.63,7.87) | 36.82(23.41,53.89) | 6.59(4.24,9.55) | 246.10(136.80,393.01) | 25.49(-15.12,71.71) | 0.81(0.74,0.88) |
| Bolivia (Plurinational State of) | 443.17(341.57,591.11) | 16.52(12.89,21.56) | 1883.05(1352.00,2602.08) | 23.99(17.54,32.62) | 324.90(210.44,489.40) | 45.25(5.69,99.27) | 1.35(1.23,1.46) |
| Bosnia and Herzegovina | 54.22(38.89,74.69) | 1.58(1.15,2.16) | 130.35(93.65,173.99) | 2.00(1.43,2.67) | 140.43(70.00,238.68) | 26.74(-8.60,77.62) | 0.84(0.57,1.12) |
| Botswana | 12.79(8.37,19.40) | 2.96(2.01,4.36) | 43.35(29.48,61.91) | 3.85(2.65,5.42) | 238.87(143.19,372.36) | 30.09(-6.24,79.26) | 0.97(0.77,1.18) |
| Brazil | 4642.60(3919.27,5436.68) | 6.21(5.25,7.31) | 17369.94(14533.26,20606.26) | 7.17(5.96,8.50) | 274.14(248.06,298.17) | 15.42(9.38,20.71) | 0.58(0.40,0.75) |
| Brunei Darussalam | 13.39(10.66,17.69) | 17.59(14.01,22.78) | 37.80(30.23,46.98) | 17.12(13.61,21.12) | 182.35(114.99,260.98) | -2.68(-24.31,21.80) | 0.54(0.28,0.80) |
| Bulgaria | 75.89(54.63,101.18) | 0.75(0.57,0.97) | 280.78(202.65,378.77) | 1.86(1.36,2.51) | 270.01(198.77,350.62) | 148.99(104.72,198.95) | 3.89(3.36,4.42) |
| Burkina Faso | 167.13(117.77,231.49) | 4.85(3.57,6.64) | 394.65(283.06,549.79) | 5.39(3.90,7.42) | 136.14(74.79,206.10) | 11.11(-18.66,41.85) | 0.32(0.25,0.39) |
| Burundi | 211.02(153.06,289.08) | 10.76(7.87,14.78) | 355.30(235.06,523.48) | 10.03(6.73,14.96) | 68.37(24.83,128.60) | -6.78(-31.90,24.74) | -0.61(-0.75,-0.46) |
| Cabo Verde | 5.97(4.43,8.11) | 2.49(1.86,3.34) | 21.32(12.99,29.90) | 5.24(3.18,7.33) | 257.13(134.50,367.97) | 110.42(36.48,173.81) | 2.12(1.82,2.43) |
| Cambodia | 266.76(199.71,349.47) | 6.73(5.07,8.75) | 800.54(560.73,1100.24) | 7.58(5.37,10.23) | 200.10(97.39,326.17) | 12.62(-25.15,58.99) | 0.32(0.16,0.48) |
| Cameroon | 336.09(225.23,474.17) | 9.67(6.60,13.36) | 1008.71(652.54,1496.27) | 10.57(6.93,15.31) | 200.13(127.85,305.73) | 9.27(-16.02,44.06) | 0.43(0.20,0.66) |
| Canada | 561.90(441.04,696.83) | 1.74(1.37,2.16) | 1952.57(1499.21,2563.25) | 2.39(1.85,3.08) | 247.49(205.46,284.32) | 37.47(25.41,47.90) | 1.42(1.20,1.64) |
| Central African Republic | 77.56(53.83,110.32) | 8.95(6.39,12.27) | 143.99(93.86,209.04) | 9.13(6.31,13.18) | 85.65(40.21,143.64) | 2.07(-22.74,31.69) | 0.08(0.03,0.12) |
| Chad | 101.12(70.35,146.03) | 4.09(2.87,5.75) | 225.57(153.03,341.82) | 4.98(3.44,7.47) | 123.08(68.76,193.81) | 21.87(-5.49,58.05) | 0.48(0.30,0.65) |
| Chile | 272.93(212.66,347.87) | 3.02(2.40,3.82) | 1057.52(806.93,1349.03) | 4.00(3.06,5.08) | 287.47(241.68,335.77) | 32.45(19.72,45.32) | 1.36(0.91,1.81) |
| China | 43537.42(35987.53,53065.28) | 6.83(5.74,8.34) | 107652.07(84625.74,134047.36) | 5.64(4.46,7.00) | 147.26(89.29,209.34) | -17.41(-37.39,1.90) | -0.57(-0.67,-0.48) |
| Colombia | 619.39(490.51,767.13) | 4.15(3.34,5.13) | 1970.78(1457.25,2617.31) | 3.53(2.61,4.70) | 218.18(163.31,277.57) | -14.83(-28.91,-0.01) | -0.28(-0.43,-0.13) |
| Comoros | 14.92(10.64,20.64) | 9.79(7.13,13.21) | 42.29(28.50,61.18) | 10.68(7.19,15.04) | 183.43(103.86,295.98) | 9.09(-19.63,49.18) | 0.12(0.03,0.21) |
| Congo | 89.26(60.80,122.04) | 10.88(7.25,14.70) | 214.01(133.90,300.12) | 11.10(6.91,15.79) | 139.75(79.48,202.91) | 2.01(-20.67,26.08) | -0.12(-0.23,-0.00) |
| Cook Islands | 1.22(0.96,1.66) | 11.84(9.28,15.93) | 3.82(2.90,4.67) | 15.05(11.37,18.40) | 212.54(100.81,345.30) | 27.11(-18.26,79.97) | 0.82(0.72,0.92) |
| Costa Rica | 62.94(49.95,78.17) | 3.87(3.09,4.82) | 422.24(330.41,535.82) | 7.61(5.93,9.70) | 570.80(494.71,651.87) | 96.62(74.44,120.29) | 2.39(2.01,2.77) |
| Côte d'Ivoire | 132.16(95.00,184.68) | 4.65(3.39,6.31) | 411.76(278.97,583.50) | 4.98(3.51,6.94) | 195.30(142.78,261.60) | 55.22(30.24,85.57) | 0.03(-0.07,0.14) |
| Croatia | 59.00(43.47,77.54) | 1.10(0.81,1.43) | 174.22(122.42,241.84) | 1.71(1.22,2.34) | 343.69(283.51,411.04) | 112.78(84.92,142.96) | 1.23(0.87,1.60) |
| Cuba | 356.79(313.73,406.24) | 3.61(3.18,4.10) | 1583.05(1327.33,1895.93) | 7.69(6.47,9.26) | 81.66(35.73,140.24) | -48.15(-60.03,-32.53) | 3.09(2.76,3.42) |
| Cyprus | 33.59(22.86,47.68) | 7.04(4.96,10.20) | 61.02(43.31,84.84) | 3.65(2.60,5.10) | 58.80(28.21,95.68) | -6.95(-24.90,14.48) | -2.32(-2.60,-2.04) |
| Czechia | 127.05(92.25,168.85) | 0.91(0.67,1.18) | 201.75(145.17,274.57) | 0.84(0.61,1.15) | 211.56(142.34,319.19) | 6.94(-15.46,39.62) | -0.19(-0.40,0.02) |
| Democratic People's Republic of Korea | 929.63(660.56,1254.93) | 7.18(5.06,10.05) | 2183.20(1674.04,2857.06) | 7.14(5.49,9.56) | 134.85(64.82,231.58) | -0.57(-28.58,39.17) | 0.13(-0.00,0.27) |
| Democratic Republic of the Congo | 998.41(711.05,1383.09) | 8.84(6.62,11.93) | 2445.43(1604.18,3594.69) | 9.15(6.00,13.68) | 144.93(66.76,254.10) | 3.47(-27.90,45.70) | -0.02(-0.13,0.10) |
| Denmark | 69.18(52.65,90.30) | 0.77(0.59,0.99) | 303.05(241.79,376.93) | 2.13(1.71,2.63) | 338.04(262.88,444.78) | 175.78(130.05,239.02) | 3.44(3.10,3.79) |
| Djibouti | 7.47(5.16,10.83) | 8.23(5.81,11.40) | 52.56(35.88,76.09) | 12.33(8.76,17.26) | 603.55(363.50,917.62) | 49.79(1.13,110.87) | 1.31(1.20,1.43) |
| Dominica | 8.88(7.40,10.65) | 14.96(12.50,17.83) | 18.56(14.24,23.36) | 23.33(18.18,28.99) | 109.10(69.45,158.80) | 55.96(26.61,92.11) | 1.63(1.54,1.72) |
| Dominican Republic | 191.75(152.13,251.62) | 6.18(4.91,8.10) | 911.40(591.03,1233.44) | 9.43(6.11,12.72) | 375.31(205.78,539.51) | 52.41(-1.80,107.31) | 2.14(1.85,2.42) |
| Ecuador | 395.18(327.84,466.41) | 8.59(7.18,10.25) | 2525.21(1848.14,3557.96) | 16.46(12.32,22.96) | 539.00(385.23,742.03) | 91.70(47.49,148.04) | 2.28(1.32,3.25) |
| Egypt | 1812.07(1225.55,2850.49) | 9.34(6.23,14.77) | 6532.86(4670.52,9047.17) | 14.02(10.14,19.48) | 260.52(109.34,397.84) | 50.09(-11.15,104.79) | 1.64(1.53,1.76) |
| El Salvador | 147.69(111.65,226.24) | 5.22(3.92,7.98) | 986.21(658.01,1344.15) | 15.47(10.33,21.27) | 567.77(283.65,778.44) | 196.61(70.25,290.88) | 3.58(3.06,4.11) |
| Equatorial Guinea | 12.79(9.06,17.77) | 8.34(6.05,11.32) | 42.25(22.67,63.75) | 11.53(6.12,17.33) | 230.27(92.48,397.28) | 38.28(-21.38,103.97) | 1.41(1.01,1.82) |
| Eritrea | 68.87(47.06,102.35) | 8.76(5.98,12.75) | 204.80(132.05,338.42) | 10.86(7.06,17.68) | 197.36(130.11,293.77) | 24.02(-5.19,68.65) | 0.69(0.59,0.79) |
| Estonia | 9.81(7.22,13.10) | 0.49(0.37,0.65) | 85.23(64.58,109.59) | 2.47(1.89,3.14) | 768.47(563.98,1070.63) | 405.01(296.37,564.26) | 5.06(4.60,5.52) |
| Eswatini | 13.42(9.38,19.04) | 5.94(4.27,8.29) | 37.33(22.01,55.66) | 8.26(5.03,12.01) | 178.04(94.02,285.11) | 39.10(-1.44,88.54) | 1.32(0.64,2.00) |
| Ethiopia | 4141.56(3244.93,5141.53) | 27.39(21.92,33.02) | 5989.00(4758.30,7316.16) | 17.53(13.91,21.44) | 44.61(16.65,80.29) | -35.98(-48.44,-21.57) | -1.82(-1.96,-1.67) |
| Fiji | 49.55(33.78,73.66) | 17.90(12.54,27.18) | 191.29(140.68,251.90) | 32.07(24.03,41.32) | 286.08(116.28,549.62) | 79.15(-1.18,195.51) | 1.41(1.04,1.79) |
| Finland | 56.17(42.90,71.21) | 0.77(0.59,0.97) | 214.25(163.82,264.98) | 1.25(0.98,1.53) | 281.42(209.34,372.34) | 62.34(34.61,97.90) | 2.14(1.93,2.35) |
| France | 1137.62(842.84,1511.76) | 1.25(0.94,1.65) | 2439.14(1845.14,3080.59) | 1.18(0.92,1.45) | 114.41(70.54,170.43) | -5.52(-22.08,16.08) | 0.30(-0.08,0.67) |
| Gabon | 49.84(35.70,68.78) | 10.18(7.45,13.91) | 120.99(60.71,179.53) | 15.39(7.37,22.77) | 142.74(50.62,223.72) | 51.23(-9.20,98.72) | 1.30(1.12,1.48) |
| Gambia | 13.49(9.53,19.26) | 4.94(3.58,6.88) | 51.89(34.95,74.41) | 6.53(4.42,9.59) | 284.71(164.77,437.15) | 32.18(-7.54,80.24) | 0.77(0.67,0.87) |
| Georgia | 24.79(16.92,36.15) | 0.40(0.27,0.57) | 115.22(82.39,161.82) | 1.86(1.33,2.61) | 364.85(246.83,520.20) | 366.12(246.72,517.96) | 5.46(4.66,6.26) |
| Germany | 1882.44(1392.24,2509.55) | 1.37(1.03,1.79) | 6662.14(4622.78,9474.66) | 2.57(1.81,3.58) | 253.91(186.89,338.63) | 87.71(57.76,124.32) | 2.95(2.44,3.47) |
| Ghana | 254.86(175.60,375.36) | 5.45(3.86,8.08) | 1199.34(870.56,1678.48) | 9.58(6.95,13.48) | 370.59(185.28,548.97) | 75.68(6.34,139.71) | 2.27(2.08,2.46) |
| Greece | 627.77(467.36,825.00) | 4.34(3.27,5.65) | 1437.38(1137.80,1725.70) | 4.36(3.56,5.13) | 128.97(87.44,183.51) | 0.55(-16.74,21.42) | -0.75(-1.73,0.24) |
| Greenland | 0.80(0.62,1.02) | 3.39(2.60,4.35) | 2.05(1.42,2.71) | 3.71(2.62,5.03) | 155.28(91.22,234.92) | 9.42(-17.74,43.25) | 0.76(0.55,0.98) |
| Grenada | 11.43(9.64,13.49) | 14.90(12.56,17.67) | 27.91(23.20,33.61) | 26.70(21.99,31.76) | 144.23(109.13,183.58) | 79.13(53.66,107.20) | 2.18(1.89,2.47) |
| Guam | 5.81(4.89,7.42) | 10.66(9.02,13.25) | 24.30(19.97,28.44) | 11.15(9.12,13.08) | 318.30(218.84,416.22) | 4.57(-20.15,27.40) | 1.13(0.60,1.67) |
| Guatemala | 192.27(148.03,240.83) | 7.37(5.83,9.23) | 1133.14(840.74,1527.55) | 11.18(8.36,14.91) | 489.33(378.29,610.85) | 51.80(23.74,81.32) | 2.16(1.71,2.61) |
| Guinea | 94.26(64.97,134.28) | 3.31(2.30,4.69) | 171.28(114.54,254.85) | 3.70(2.51,5.50) | 81.71(36.21,146.16) | 11.86(-14.89,50.25) | 0.24(0.16,0.32) |
| Guinea-Bissau | 22.87(16.27,31.96) | 7.16(5.13,9.78) | 35.93(25.72,51.31) | 6.84(4.93,9.54) | 57.08(18.39,112.33) | -4.42(-27.41,25.90) | -0.20(-0.25,-0.16) |
| Guyana | 43.59(36.83,51.53) | 13.14(11.21,15.47) | 143.32(110.90,183.96) | 24.59(19.07,31.12) | 228.80(147.95,319.63) | 87.05(43.29,135.13) | 3.05(2.67,3.43) |
| Haiti | 316.91(217.55,550.17) | 11.63(7.92,20.66) | 777.20(415.27,1712.90) | 13.08(7.15,28.35) | 145.24(52.48,252.92) | 12.52(-27.11,56.96) | 0.61(0.53,0.69) |
| Honduras | 46.62(33.65,64.66) | 2.61(1.93,3.65) | 324.49(222.12,447.56) | 5.85(4.09,7.99) | 595.97(342.96,861.33) | 123.82(40.97,206.70) | 2.90(2.61,3.19) |
| Hungary | 82.82(62.55,109.05) | 0.58(0.44,0.76) | 246.54(179.92,337.68) | 1.11(0.82,1.51) | 197.69(144.61,257.73) | 92.14(62.61,126.92) | 3.30(2.89,3.70) |
| Iceland | 1.18(0.88,1.62) | 0.38(0.28,0.52) | 4.44(3.32,5.69) | 0.63(0.48,0.82) | 275.41(212.10,356.89) | 66.51(40.25,100.50) | 2.21(1.93,2.48) |
| India | 15340.14(12049.44,19023.20) | 3.88(3.09,4.77) | 56201.66(42578.28,70450.21) | 5.16(3.97,6.52) | 266.37(173.36,355.10) | 33.02(-1.22,63.09) | 0.86(0.70,1.03) |
| Indonesia | 4692.49(3753.17,6230.64) | 5.51(4.41,7.48) | 15859.93(12207.17,20633.55) | 7.85(6.09,10.63) | 237.99(155.60,316.34) | 42.38(8.83,76.34) | 1.20(1.08,1.31) |
| Iran (Islamic Republic of) | 868.96(612.17,1218.57) | 4.50(3.15,6.40) | 3432.94(2549.87,4341.70) | 5.15(3.77,6.57) | 295.06(156.41,418.33) | 14.37(-25.38,45.52) | 0.53(0.38,0.67) |
| Iraq | 654.91(471.30,907.34) | 8.94(6.43,12.52) | 2079.27(1297.88,2912.11) | 11.11(7.08,15.46) | 217.49(85.86,360.33) | 24.31(-25.66,77.94) | 0.43(0.22,0.63) |
| Ireland | 55.17(41.64,73.34) | 1.41(1.08,1.85) | 126.28(88.08,172.76) | 1.45(1.02,1.97) | 128.92(91.13,170.60) | 3.10(-10.53,16.36) | 0.79(0.57,1.01) |
| Israel | 210.87(158.84,278.33) | 4.67(3.53,6.03) | 603.90(445.71,802.01) | 4.25(3.15,5.63) | 186.38(145.30,236.62) | -8.92(-17.75,-1.28) | 0.44(-0.22,1.11) |
| Italy | 1203.26(905.53,1593.94) | 1.34(1.02,1.74) | 2874.01(1974.13,4074.50) | 1.39(0.99,1.92) | 138.85(96.63,185.71) | 3.77(-8.97,15.04) | 0.18(0.04,0.32) |
| Jamaica | 188.93(158.64,219.97) | 10.15(8.57,11.79) | 380.34(277.63,503.68) | 11.87(8.67,15.85) | 101.32(55.18,160.35) | 16.95(-9.71,52.95) | -0.09(-0.73,0.56) |
| Japan | 6430.93(5188.99,7844.42) | 4.15(3.33,5.08) | 18934.34(13474.97,24887.18) | 3.38(2.54,4.26) | 194.43(142.30,239.95) | -18.51(-24.71,-13.39) | -0.67(-0.81,-0.53) |
| Jordan | 108.46(81.32,142.45) | 10.66(7.94,14.27) | 635.46(470.76,843.54) | 11.59(8.59,15.52) | 485.90(292.60,707.73) | 8.73(-27.13,47.99) | 0.08(-0.28,0.45) |
| Kazakhstan | 85.05(62.39,112.46) | 0.67(0.49,0.89) | 311.43(225.20,429.88) | 1.95(1.43,2.70) | 266.19(181.86,371.14) | 190.26(122.62,276.92) | 3.21(2.84,3.57) |
| Kenya | 460.41(328.50,724.14) | 7.06(5.11,11.21) | 1855.79(1330.52,2497.24) | 10.99(7.95,14.70) | 303.07(203.64,419.47) | 55.56(16.49,100.42) | 1.64(1.57,1.72) |
| Kiribati | 5.70(4.55,7.11) | 19.07(15.21,23.99) | 15.52(9.98,23.06) | 28.02(18.31,40.41) | 172.24(61.30,323.89) | 46.87(-9.83,124.15) | 1.00(0.67,1.32) |
| Kuwait | 32.17(25.20,40.48) | 7.10(5.44,9.08) | 83.30(57.09,113.10) | 3.78(2.52,5.32) | 158.90(93.49,230.32) | -46.86(-59.87,-32.78) | -1.98(-2.25,-1.70) |
| Kyrgyzstan | 12.70(9.24,17.33) | 0.44(0.32,0.58) | 60.08(43.10,80.73) | 1.34(0.99,1.79) | 372.92(261.10,507.23) | 207.77(137.05,295.62) | 2.13(1.18,3.08) |
| Lao People's Democratic Republic | 286.33(210.38,390.18) | 15.87(11.77,21.33) | 600.42(406.77,839.65) | 15.45(10.54,21.21) | 109.69(47.60,190.62) | -2.64(-30.24,33.72) | -0.21(-0.25,-0.16) |
| Latvia | 7.96(5.81,10.47) | 0.23(0.17,0.30) | 49.05(35.39,67.31) | 1.02(0.74,1.39) | 516.44(370.28,688.38) | 350.21(257.35,457.66) | 5.61(5.11,6.11) |
| Lebanon | 122.96(81.13,171.48) | 6.74(4.59,9.59) | 431.62(318.70,581.79) | 6.61(4.95,8.84) | 251.03(153.64,395.11) | -1.96(-28.49,37.79) | 0.10(-0.02,0.22) |
| Lesotho | 15.74(10.68,23.40) | 2.12(1.43,3.01) | 43.65(27.13,66.79) | 4.80(3.03,7.18) | 177.42(88.89,281.05) | 126.84(51.79,205.45) | 3.51(3.04,3.99) |
| Liberia | 63.69(45.26,89.05) | 6.66(4.84,9.14) | 115.96(79.41,167.42) | 7.37(5.01,10.37) | 82.07(26.70,147.77) | 10.60(-21.95,48.92) | 0.55(0.29,0.82) |
| Libya | 87.11(58.26,128.90) | 5.21(3.49,7.61) | 395.22(234.11,561.58) | 9.00(5.41,12.71) | 353.69(124.97,614.20) | 72.71(-14.01,171.54) | 2.52(2.27,2.77) |
| Lithuania | 7.63(5.61,9.90) | 0.17(0.13,0.23) | 44.95(33.35,61.67) | 0.66(0.49,0.90) | 489.16(368.41,604.81) | 282.38(211.76,352.02) | 3.21(2.63,3.79) |
| Luxembourg | 9.04(6.78,11.89) | 1.72(1.31,2.24) | 27.13(18.83,37.95) | 2.16(1.53,2.99) | 200.12(143.59,264.68) | 25.96(7.73,46.28) | 1.14(0.90,1.37) |
| Madagascar | 296.78(208.68,446.91) | 7.31(5.17,11.02) | 591.50(395.52,842.61) | 7.68(5.25,10.62) | 99.30(38.63,171.71) | 5.11(-27.07,41.82) | 0.19(0.10,0.28) |
| Malawi | 293.64(211.25,396.52) | 10.01(7.45,13.23) | 687.73(505.19,916.29) | 12.18(9.11,16.11) | 134.21(76.21,199.33) | 21.74(-9.70,54.49) | 0.46(0.26,0.67) |
| Malaysia | 757.41(627.53,907.61) | 9.10(7.51,10.85) | 3040.55(2445.64,3664.52) | 12.06(9.75,14.44) | 301.44(219.16,376.71) | 32.51(5.24,57.85) | 0.67(0.43,0.92) |
| Maldives | 12.59(9.57,17.46) | 18.10(13.94,26.65) | 31.13(24.02,39.41) | 11.44(8.79,14.54) | 147.30(72.76,234.27) | -36.78(-56.91,-15.23) | -1.78(-1.98,-1.59) |
| Mali | 166.95(115.79,234.06) | 5.49(3.99,7.39) | 376.76(268.95,550.64) | 5.63(4.11,8.21) | 125.68(73.24,201.12) | 2.62(-19.30,33.81) | 0.21(0.08,0.34) |
| Malta | 8.04(6.08,10.46) | 2.08(1.59,2.73) | 25.20(18.01,34.00) | 2.16(1.56,2.89) | 213.56(165.38,268.76) | 4.04(-8.84,18.06) | 0.18(-0.07,0.43) |
| Marshall Islands | 2.76(1.70,5.04) | 20.84(12.84,38.62) | 9.15(2.85,27.20) | 34.84(10.90,104.71) | 232.02(43.88,441.83) | 67.23(-26.28,177.44) | 1.67(1.44,1.89) |
| Mauritania | 53.76(36.43,77.21) | 6.36(4.43,9.00) | 111.61(67.94,170.27) | 6.28(3.89,9.33) | 107.60(52.95,178.77) | -1.36(-27.24,31.13) | -0.40(-0.58,-0.23) |
| Mauritius | 111.95(95.85,128.64) | 17.65(15.32,20.29) | 584.76(507.47,662.37) | 32.50(28.46,36.73) | 422.36(382.08,466.56) | 84.09(71.13,98.09) | 2.18(1.77,2.60) |
| Mexico | 3174.45(2565.06,3831.34) | 9.41(7.63,11.46) | 16033.49(12632.93,19981.59) | 13.35(10.59,16.53) | 405.08(345.44,470.73) | 41.85(24.89,60.82) | 1.78(1.12,2.44) |
| Micronesia (Federated States of) | 8.85(5.95,14.32) | 21.58(14.52,35.88) | 21.61(15.39,30.79) | 37.66(27.24,54.15) | 144.23(46.35,294.91) | 74.46(5.68,174.81) | 1.76(1.33,2.20) |
| Monaco | 0.92(0.63,1.32) | 1.07(0.75,1.52) | 2.22(1.51,3.10) | 1.73(1.21,2.42) | 142.31(82.33,226.37) | 62.18(26.39,115.07) | 1.78(1.49,2.07) |
| Mongolia | 20.00(13.96,28.31) | 2.04(1.43,2.85) | 34.74(24.24,47.29) | 1.80(1.26,2.43) | 73.74(26.16,131.09) | -11.31(-35.48,17.37) | -0.83(-0.99,-0.66) |
| Montenegro | 7.71(5.50,10.80) | 1.32(0.95,1.85) | 19.12(12.75,27.60) | 2.12(1.38,3.08) | 147.98(62.31,251.10) | 60.40(1.86,126.70) | 1.88(1.68,2.08) |
| Morocco | 459.24(273.91,858.50) | 3.62(2.18,7.01) | 1995.34(1402.92,2777.25) | 6.60(4.67,9.13) | 334.49(148.88,540.06) | 82.47(3.72,169.07) | 2.41(2.22,2.61) |
| Mozambique | 301.00(216.18,459.13) | 7.10(5.20,10.50) | 770.22(546.33,1202.38) | 10.01(6.91,14.81) | 155.89(77.21,248.13) | 40.88(-3.07,91.88) | 1.53(1.38,1.67) |
| Myanmar | 1775.02(1289.99,2431.40) | 8.76(6.51,11.89) | 3794.16(2910.60,5013.87) | 8.92(6.87,11.97) | 113.75(49.84,205.00) | 1.83(-28.39,45.39) | -0.17(-0.25,-0.09) |
| Namibia | 14.69(9.67,21.62) | 2.86(1.93,4.14) | 39.62(26.67,58.48) | 3.59(2.47,5.22) | 169.76(95.39,263.17) | 25.42(-7.41,65.98) | 0.56(0.25,0.87) |
| Nauru | 0.90(0.55,1.51) | 26.32(16.68,45.68) | 1.83(1.24,2.89) | 40.64(27.35,72.11) | 103.81(31.47,224.93) | 54.40(1.44,139.22) | 1.26(1.14,1.38) |
| Nepal | 324.37(229.68,455.54) | 4.06(2.92,5.67) | 1282.62(884.89,1818.12) | 6.21(4.35,8.81) | 295.43(142.98,482.98) | 53.22(-6.56,123.01) | 1.61(1.23,2.00) |
| Netherlands | 187.63(137.94,255.81) | 0.91(0.67,1.23) | 640.53(487.19,809.38) | 1.55(1.19,1.95) | 241.38(181.82,317.27) | 70.08(41.05,104.40) | 1.68(1.14,2.22) |
| New Zealand | 30.20(22.87,39.01) | 0.80(0.61,1.03) | 116.17(87.98,149.42) | 1.28(0.98,1.65) | 284.65(240.99,329.34) | 61.14(46.59,76.86) | 1.82(1.20,2.45) |
| Nicaragua | 84.42(64.12,119.57) | 6.22(4.74,8.82) | 552.08(409.15,758.30) | 12.17(9.12,16.81) | 553.94(356.40,721.33) | 95.65(37.74,145.23) | 2.75(2.30,3.19) |
| Niger | 64.17(43.27,94.31) | 3.09(2.07,4.36) | 176.32(116.67,291.64) | 2.88(1.94,4.53) | 174.79(101.62,275.56) | -6.66(-30.44,23.24) | -0.28(-0.37,-0.18) |
| Nigeria | 1565.62(1106.29,2108.21) | 4.45(3.19,6.04) | 2823.28(1947.86,3854.10) | 4.24(2.95,5.77) | 80.33(38.73,126.39) | -4.80(-25.44,17.33) | -0.82(-1.16,-0.48) |
| Niue | 0.47(0.36,0.63) | 19.81(15.10,26.56) | 0.75(0.44,1.15) | 36.32(21.28,55.84) | 60.00(-13.33,148.40) | 83.36(-0.69,183.08) | 1.94(1.75,2.12) |
| North Macedonia | 17.39(12.48,23.83) | 1.03(0.74,1.40) | 43.44(28.86,63.72) | 1.52(1.03,2.16) | 149.85(81.18,235.40) | 47.00(8.90,99.95) | 1.23(0.58,1.89) |
| Northern Mariana Islands | 2.98(2.34,3.90) | 27.00(21.91,34.24) | 17.03(13.77,21.40) | 42.52(34.32,51.00) | 471.23(316.29,676.77) | 57.51(18.96,103.72) | 1.60(1.41,1.79) |
| Norway | 38.32(28.93,51.00) | 0.49(0.37,0.64) | 108.50(77.46,148.88) | 0.87(0.63,1.16) | 183.16(144.36,228.39) | 78.49(59.08,97.78) | 1.98(1.54,2.43) |
| Oman | 29.17(19.71,43.43) | 5.27(3.55,7.73) | 138.13(99.26,191.53) | 9.85(7.10,13.30) | 373.46(219.01,592.73) | 87.00(16.95,173.12) | 2.67(2.36,2.99) |
| Pakistan | 2836.07(2073.02,3861.99) | 5.66(4.13,7.69) | 8299.88(6160.21,11022.18) | 8.27(6.19,10.97) | 192.65(121.33,281.81) | 46.10(12.76,88.16) | 1.04(0.80,1.28) |
| Palau | 1.55(1.12,2.03) | 19.43(14.08,25.62) | 5.54(3.91,7.55) | 33.16(23.66,44.30) | 258.38(125.66,461.22) | 70.62(6.88,159.12) | 1.93(1.71,2.14) |
| Palestine | 66.84(45.53,96.68) | 9.12(6.20,13.22) | 171.33(129.25,231.14) | 9.01(6.67,11.94) | 156.33(77.49,264.17) | -1.19(-30.23,37.78) | -0.06(-0.34,0.22) |
| Panama | 41.32(32.34,51.51) | 2.98(2.35,3.71) | 321.72(234.24,434.62) | 7.16(5.20,9.72) | 678.66(514.18,851.58) | 140.04(90.24,192.23) | 3.16(2.67,3.65) |
| Papua New Guinea | 95.99(63.24,140.23) | 6.66(4.63,9.66) | 327.05(239.73,462.75) | 8.19(6.09,12.15) | 240.72(113.43,456.13) | 22.85(-22.25,95.67) | 0.66(0.62,0.70) |
| Paraguay | 117.18(92.06,148.53) | 5.82(4.58,7.39) | 512.65(360.88,705.61) | 9.51(6.69,13.07) | 337.49(208.50,492.68) | 63.41(15.37,119.74) | 1.81(1.68,1.94) |
| Peru | 1038.74(823.53,1297.67) | 9.69(7.70,12.14) | 3969.85(2658.82,5528.76) | 12.05(8.04,16.83) | 282.18(163.68,401.55) | 24.25(-13.93,63.33) | 0.48(0.26,0.70) |
| Philippines | 2481.73(2038.97,3025.87) | 11.36(9.51,13.47) | 10925.25(8757.68,13662.16) | 15.18(12.29,18.71) | 340.23(244.97,425.14) | 33.63(9.73,58.82) | 1.41(1.26,1.55) |
| Poland | 668.98(498.62,870.67) | 1.58(1.19,2.03) | 724.70(547.88,965.70) | 0.93(0.71,1.23) | 8.33(-5.90,24.53) | -41.09(-47.60,-33.30) | -2.29(-2.93,-1.65) |
| Portugal | 304.68(232.13,395.93) | 2.38(1.83,3.08) | 939.77(661.48,1287.53) | 2.83(2.03,3.80) | 208.44(149.51,277.67) | 19.09(3.33,36.15) | 0.60(0.08,1.13) |
| Puerto Rico | 520.43(451.36,593.64) | 15.06(13.15,17.14) | 1382.70(1144.23,1635.12) | 16.24(13.49,19.25) | 165.68(118.81,222.10) | 7.89(-12.60,30.41) | 0.99(0.50,1.48) |
| Qatar | 5.32(3.08,8.43) | 9.08(5.04,15.12) | 40.48(28.76,57.67) | 9.00(6.61,12.45) | 660.86(379.97,1278.91) | -0.84(-38.68,78.39) | -0.46(-1.11,0.19) |
| Republic of Korea | 1263.49(1068.68,1460.64) | 6.03(5.07,7.13) | 4208.65(3262.80,5249.76) | 4.58(3.53,5.73) | 233.10(165.63,305.73) | -24.01(-40.33,-7.46) | -0.57(-0.75,-0.39) |
| Republic of Moldova | 6.23(4.42,8.21) | 0.17(0.13,0.22) | 21.12(14.95,29.93) | 0.34(0.25,0.48) | 239.22(191.76,297.56) | 101.96(66.97,142.65) | 1.86(1.34,2.38) |
| Romania | 88.85(64.11,130.89) | 0.36(0.27,0.52) | 272.36(213.87,344.06) | 0.67(0.52,0.84) | 206.54(118.61,314.48) | 84.31(34.51,146.01) | 3.07(2.37,3.78) |
| Russian Federation | 806.48(596.85,1060.55) | 0.47(0.36,0.61) | 2404.00(1847.59,3134.67) | 0.98(0.76,1.28) | 198.09(158.06,238.33) | 110.42(84.57,133.97) | 2.40(1.82,2.98) |
| Rwanda | 239.39(172.74,325.82) | 10.87(8.07,14.55) | 414.21(285.88,608.01) | 8.94(6.29,13.10) | 73.03(23.63,136.86) | -17.76(-41.09,12.08) | -1.43(-1.77,-1.08) |
| Saint Kitts and Nevis | 7.26(6.18,8.49) | 19.02(16.40,22.02) | 15.74(12.47,19.32) | 27.40(22.33,32.83) | 116.90(73.48,153.76) | 44.09(17.94,66.56) | 2.17(1.85,2.49) |
| Saint Lucia | 12.96(11.11,14.90) | 16.40(14.21,18.85) | 41.69(33.67,50.93) | 17.91(14.46,21.92) | 221.78(164.19,281.02) | 9.17(-10.47,28.84) | 0.51(0.20,0.82) |
| Saint Vincent and the Grenadines | 7.87(6.72,9.05) | 11.61(9.93,13.52) | 23.95(19.97,28.68) | 17.94(15.05,21.24) | 204.33(163.49,246.44) | 54.51(34.28,76.94) | 2.06(1.72,2.41) |
| Samoa | 14.42(10.45,19.77) | 20.42(14.74,27.58) | 35.38(26.59,46.07) | 28.43(21.55,36.36) | 145.32(67.81,271.87) | 39.24(-4.43,107.52) | 0.96(0.82,1.10) |
| San Marino | 0.36(0.26,0.51) | 0.95(0.67,1.32) | 0.76(0.46,1.18) | 0.69(0.41,1.05) | 110.72(46.03,190.55) | -27.53(-49.73,-0.75) | 0.26(-0.19,0.70) |
| Sao Tome and Principe | 4.87(3.72,6.39) | 8.60(6.69,11.38) | 10.64(7.01,14.44) | 12.35(7.96,17.00) | 118.73(55.20,170.73) | 43.66(3.97,76.16) | 1.28(1.21,1.35) |
| Saudi Arabia | 538.43(367.30,775.00) | 11.14(7.69,16.02) | 2814.92(1951.52,3813.77) | 20.07(14.02,26.79) | 422.81(188.55,671.51) | 80.15(-0.36,157.52) | 1.67(1.47,1.87) |
| Senegal | 181.04(129.67,240.43) | 6.82(4.97,8.93) | 478.77(335.65,696.61) | 7.65(5.39,11.04) | 164.45(97.19,263.99) | 12.11(-15.70,52.60) | 0.25(0.17,0.33) |
| Serbia | 200.98(144.28,276.26) | 2.27(1.63,3.11) | 420.91(313.95,535.07) | 2.37(1.77,3.01) | 109.43(48.69,195.01) | 4.39(-29.73,42.84) | 0.37(0.19,0.54) |
| Seychelles | 6.37(5.24,7.88) | 11.35(9.30,13.99) | 19.78(15.29,24.63) | 19.19(15.02,23.89) | 210.31(144.53,292.60) | 69.10(33.26,111.93) | 1.81(1.51,2.11) |
| Sierra Leone | 76.13(53.58,107.49) | 4.29(3.12,6.04) | 130.26(87.45,188.06) | 4.29(2.95,6.16) | 71.09(29.16,123.47) | -0.10(-23.00,27.55) | -0.01(-0.07,0.05) |
| Singapore | 118.44(102.04,135.73) | 6.61(5.66,7.55) | 415.99(344.43,490.96) | 5.09(4.19,6.01) | 251.22(207.63,293.94) | -23.06(-31.72,-15.00) | 0.94(0.35,1.54) |
| Slovakia | 81.14(58.08,108.03) | 1.36(0.98,1.84) | 120.34(86.09,168.30) | 1.23(0.87,1.70) | 48.32(15.34,86.87) | -9.47(-29.29,13.57) | -0.15(-0.35,0.06) |
| Slovenia | 14.93(11.81,18.26) | 0.61(0.49,0.75) | 37.27(24.74,56.18) | 0.68(0.45,1.02) | 149.58(87.43,233.12) | 11.40(-14.21,45.19) | 1.17(0.78,1.56) |
| Solomon Islands | 14.58(6.56,23.32) | 13.36(7.48,20.49) | 42.40(32.99,54.46) | 14.93(12.01,18.87) | 190.81(78.49,506.17) | 11.77(-29.45,112.22) | 0.32(0.11,0.54) |
| Somalia | 208.31(139.21,312.14) | 12.51(8.62,18.59) | 582.76(370.64,886.36) | 13.51(9.06,20.11) | 179.76(108.96,269.68) | 8.03(-16.52,40.32) | 0.40(0.30,0.51) |
| South Africa | 492.65(363.40,709.51) | 2.80(2.07,4.04) | 1626.04(1233.18,2175.54) | 4.19(3.20,5.59) | 230.06(140.19,294.04) | 49.78(7.23,78.15) | 2.02(1.67,2.36) |
| South Sudan | 250.64(168.97,384.93) | 11.56(8.09,17.31) | 452.36(296.24,648.15) | 15.88(10.91,22.55) | 80.48(3.34,159.07) | 37.36(-17.88,92.91) | 0.96(0.81,1.12) |
| Spain | 1240.50(934.10,1642.94) | 2.31(1.73,3.01) | 2584.29(1796.53,3648.07) | 1.83(1.29,2.52) | 108.33(69.02,150.41) | -20.84(-31.07,-10.30) | -0.35(-0.60,-0.09) |
| Sri Lanka | 831.84(637.56,1060.36) | 9.55(7.26,12.09) | 2006.84(1320.73,2852.02) | 7.99(5.33,11.14) | 141.25(49.25,260.94) | -16.41(-47.72,26.59) | -0.55(-0.74,-0.36) |
| Sudan | 228.60(137.79,423.41) | 2.81(1.70,5.33) | 699.65(468.78,1036.52) | 4.31(2.94,6.38) | 206.06(63.28,375.80) | 53.63(-17.01,140.41) | 1.19(0.93,1.44) |
| Suriname | 28.32(23.52,34.86) | 12.10(10.16,14.85) | 111.30(79.14,146.93) | 18.37(13.16,24.01) | 292.98(181.28,428.97) | 51.84(8.58,102.26) | 1.79(1.56,2.02) |
| Sweden | 119.50(88.82,157.71) | 0.68(0.51,0.89) | 475.45(336.87,653.38) | 1.64(1.17,2.22) | 297.87(233.62,373.51) | 140.98(108.99,176.51) | 3.45(3.25,3.64) |
| Switzerland | 118.55(88.27,157.30) | 1.02(0.77,1.34) | 395.11(288.67,504.84) | 1.57(1.19,1.98) | 233.29(161.72,314.19) | 53.49(24.79,89.27) | 2.37(2.03,2.72) |
| Syrian Arab Republic | 346.40(246.90,479.15) | 7.89(5.60,10.87) | 1012.19(654.35,1478.56) | 9.63(6.19,14.05) | 192.20(67.89,350.81) | 22.08(-32.89,84.71) | 0.23(-0.02,0.47) |
| Taiwan | 1620.19(1444.18,1808.41) | 13.96(12.37,15.64) | 5228.42(4422.00,6041.19) | 11.68(9.95,13.47) | 222.70(182.59,263.47) | -16.29(-24.61,-7.86) | -0.18(-0.52,0.17) |
| Tajikistan | 5.23(3.65,8.22) | 0.20(0.14,0.32) | 14.93(9.57,22.30) | 0.29(0.19,0.43) | 185.34(90.76,329.92) | 47.19(-4.26,114.27) | 0.81(0.33,1.30) |
| Thailand | 2615.67(2105.30,3406.93) | 9.02(7.25,11.57) | 12608.26(9428.23,16657.53) | 11.53(8.62,15.21) | 382.03(230.25,545.96) | 27.83(-10.61,68.42) | 0.50(0.40,0.60) |
| Timor-Leste | 19.47(14.33,28.20) | 8.93(6.67,12.55) | 79.98(55.14,117.59) | 10.47(7.24,15.19) | 310.81(174.82,492.83) | 17.19(-18.68,66.79) | 0.72(0.52,0.91) |
| Togo | 44.89(32.26,60.84) | 4.74(3.48,6.49) | 153.06(103.56,218.46) | 5.50(3.87,7.91) | 241.01(153.35,358.41) | 15.96(-12.80,53.94) | 0.34(0.25,0.43) |
| Tokelau | 0.20(0.14,0.35) | 16.09(11.15,28.14) | 0.35(0.25,0.54) | 23.58(16.73,35.96) | 74.52(17.16,157.01) | 46.61(-0.59,115.60) | 1.30(1.17,1.44) |
| Tonga | 4.21(2.89,5.70) | 8.84(6.16,12.20) | 10.62(7.46,13.95) | 14.02(9.82,18.34) | 152.02(76.50,276.01) | 58.59(12.03,134.72) | 1.42(1.15,1.69) |
| Trinidad and Tobago | 79.74(68.61,90.83) | 10.78(9.37,12.25) | 341.68(250.79,468.03) | 17.69(13.07,24.18) | 328.47(219.97,449.26) | 64.12(22.81,109.24) | 2.35(1.95,2.74) |
| Tunisia | 179.40(119.51,279.16) | 4.39(2.98,6.73) | 813.57(537.48,1175.74) | 6.83(4.55,9.87) | 353.49(151.66,600.44) | 55.66(-11.21,131.67) | 1.47(1.28,1.66) |
| Türkiye | 1858.44(1339.25,2689.85) | 6.43(4.62,9.30) | 5924.70(4407.98,7995.09) | 6.93(5.14,9.40) | 341.21(226.45,497.17) | 122.60(64.71,199.87) | 0.91(0.49,1.33) |
| Turkmenistan | 20.44(15.16,26.70) | 1.09(0.81,1.42) | 90.20(62.49,126.15) | 2.42(1.72,3.34) | 144.81(64.47,256.84) | 50.56(0.30,117.48) | 2.10(1.46,2.75) |
| Tuvalu | 0.97(0.70,1.57) | 17.64(13.00,28.89) | 2.38(1.70,3.55) | 26.56(18.98,39.55) | 218.80(109.31,320.34) | 7.77(-29.47,40.62) | 1.40(1.28,1.52) |
| Uganda | 474.84(333.83,666.72) | 9.27(6.66,12.96) | 1302.12(919.08,1845.12) | 11.79(8.55,16.48) | 174.22(96.50,289.01) | 27.19(-5.92,75.60) | 0.53(0.39,0.67) |
| Ukraine | 7.65(5.70,10.02) | 0.01(0.01,0.01) | 151.41(104.02,209.15) | 0.19(0.13,0.26) | 1878.28(1397.23,2486.51) | 1571.66(1157.32,2079.31) | 13.37(11.31,15.48) |
| United Arab Emirates | 17.53(11.06,26.72) | 5.88(3.69,8.93) | 165.35(105.42,240.78) | 10.14(5.34,14.68) | 843.44(501.18,1240.78) | 72.42(2.83,147.80) | 4.22(3.40,5.04) |
| United Kingdom | 758.55(571.12,984.70) | 0.78(0.59,1.01) | 1703.75(1250.05,2304.39) | 1.06(0.79,1.41) | 124.61(96.93,154.78) | 35.92(23.89,47.32) | 1.96(1.63,2.29) |
| United Republic of Tanzania | 379.68(262.80,547.94) | 4.45(3.21,6.31) | 993.33(722.28,1423.93) | 4.94(3.58,7.08) | 161.62(85.46,253.58) | 11.10(-18.88,48.75) | 0.18(0.10,0.25) |
| United States of America | 7647.81(6090.00,9494.69) | 2.30(1.84,2.81) | 55205.95(47673.12,61988.78) | 8.80(7.67,9.88) | 621.85(516.79,744.38) | 282.25(228.49,344.47) | 4.93(4.66,5.20) |
| United States Virgin Islands | 6.00(4.89,7.43) | 8.56(7.07,10.46) | 15.77(10.59,21.56) | 8.71(6.00,11.80) | 162.92(59.09,282.06) | 1.73(-36.62,44.69) | 0.38(0.06,0.70) |
| Uruguay | 101.47(91.65,109.86) | 2.56(2.32,2.77) | 224.08(171.79,294.02) | 3.43(2.67,4.41) | 120.83(74.78,182.29) | 33.96(7.59,68.58) | 1.62(1.25,1.99) |
| Uzbekistan | 73.89(43.38,130.53) | 0.70(0.41,1.26) | 453.15(337.11,604.59) | 1.99(1.49,2.67) | 513.26(256.77,875.54) | 184.00(70.54,351.10) | 2.35(1.46,3.24) |
| Vanuatu | 6.74(4.35,12.16) | 14.33(9.60,24.78) | 30.28(21.74,46.09) | 22.18(16.07,33.51) | 349.12(198.10,586.83) | 54.75(5.63,126.92) | 1.47(1.39,1.55) |
| Venezuela (Bolivarian Republic of) | 297.01(231.50,371.10) | 3.47(2.74,4.35) | 2615.27(1867.23,3786.35) | 9.10(6.48,13.07) | 780.54(570.68,1029.86) | 161.99(100.31,235.11) | 2.90(2.44,3.36) |
| Viet Nam | 3018.45(2155.52,4080.22) | 8.27(5.86,11.12) | 8536.52(6083.29,11204.91) | 9.99(7.03,13.03) | 182.81(94.94,278.66) | 20.86(-15.10,60.88) | 0.80(0.69,0.91) |
| Yemen | 162.78(100.01,313.67) | 3.98(2.44,7.99) | 472.25(297.36,768.80) | 4.14(2.65,6.83) | 190.12(95.40,348.75) | 3.91(-30.28,56.49) | 0.02(-0.10,0.15) |
| Zambia | 278.40(207.95,370.11) | 12.73(9.59,16.70) | 771.42(540.93,1108.90) | 14.93(10.74,20.71) | 177.09(97.09,311.29) | 17.29(-12.20,63.76) | 0.20(0.03,0.36) |
| Zimbabwe | 107.52(73.94,154.71) | 3.41(2.44,4.85) | 279.05(185.97,401.98) | 5.31(3.56,7.75) | 159.55(81.67,244.50) | 55.60(11.24,106.38) | 1.78(1.32,2.23) |

**Table S7. DALYs of Chronic kidney disease due to diabetes mellitus type 2 Between 1990 and 2021 at 204 Countries and Territories.**

| **Location** | **1990** | | **2021** | | **Percentage change in number between 1990 and 2021** | **Percentage change in ASR between 1990 and 2021** | **EAPC** |
| --- | --- | --- | --- | --- | --- | --- | --- |
| **Number** | **ASR** | **Number** | **ASR** |
| Afghanistan | 15863.27(10785.01,23985.70) | 225.02(155.79,347.36) | 23173.13(12682.99,39344.33) | 249.37(136.39,445.53) | 46.08(-12.22,130.23) | 10.82(-33.44,69.49) | 0.35(0.31,0.39) |
| Albania | 698.62(535.65,887.04) | 35.74(27.61,45.73) | 1407.46(1058.81,1812.13) | 32.02(24.20,41.29) | 101.46(63.35,150.47) | -10.39(-26.99,9.12) | -0.01(-0.18,0.16) |
| Algeria | 12414.80(8297.63,20903.52) | 114.93(76.68,196.84) | 48026.60(36160.80,63203.51) | 148.52(112.11,194.10) | 286.85(133.85,456.07) | 29.23(-24.33,87.77) | 1.08(0.93,1.23) |
| American Samoa | 104.94(77.38,145.41) | 498.45(366.80,698.81) | 486.65(372.21,607.59) | 1048.35(811.35,1297.79) | 363.74(191.01,609.67) | 110.32(31.28,217.86) | 2.61(2.38,2.84) |
| Andorra | 25.32(18.74,33.42) | 47.33(35.08,62.65) | 64.93(48.81,84.30) | 40.14(30.39,51.93) | 156.43(94.83,231.59) | -15.19(-35.21,7.47) | -0.35(-0.51,-0.20) |
| Angola | 5548.04(3919.79,7624.40) | 154.68(112.07,210.67) | 16939.03(11750.79,23826.26) | 159.10(112.24,220.16) | 205.32(119.69,317.74) | 2.86(-23.19,38.22) | -0.04(-0.15,0.06) |
| Antigua and Barbuda | 153.56(132.35,180.11) | 286.60(246.36,335.85) | 454.15(388.28,527.27) | 432.63(375.06,499.17) | 195.74(162.60,230.33) | 50.95(34.31,68.14) | 1.81(1.56,2.06) |
| Argentina | 40689.23(32316.60,50617.64) | 126.90(101.75,157.17) | 64072.89(51181.80,78135.31) | 112.58(90.20,137.15) | 57.47(44.94,70.44) | -11.28(-17.47,-5.32) | -0.22(-0.50,0.06) |
| Armenia | 796.74(541.24,1070.34) | 29.77(20.28,40.73) | 2566.91(1988.95,3266.43) | 58.95(45.86,74.80) | 222.18(159.46,325.49) | 98.00(59.01,161.99) | 2.35(2.06,2.64) |
| Australia | 3200.10(2462.93,4041.30) | 16.63(12.79,20.86) | 10021.10(7700.99,12682.86) | 21.37(16.41,27.18) | 213.15(172.13,263.84) | 28.50(12.22,48.36) | 1.19(0.92,1.45) |
| Austria | 4347.33(3424.99,5344.87) | 35.95(28.29,43.99) | 11243.19(9446.56,13211.71) | 54.61(46.12,64.02) | 158.62(122.78,205.77) | 51.91(34.22,75.90) | 2.17(1.73,2.61) |
| Azerbaijan | 2441.92(1843.52,3153.02) | 48.77(37.17,63.25) | 6587.70(4947.41,8445.59) | 63.96(48.68,80.93) | 169.78(120.84,231.65) | 31.15(9.47,60.41) | 0.99(0.85,1.13) |
| Bahamas | 351.10(300.35,410.87) | 229.83(195.99,266.61) | 1411.96(1121.37,1777.28) | 348.85(281.73,435.73) | 302.15(221.17,406.67) | 51.79(22.95,90.31) | 1.90(1.68,2.13) |
| Bahrain | 264.97(182.17,374.35) | 179.31(125.04,250.74) | 1443.15(1074.59,1952.40) | 201.16(148.13,271.18) | 444.65(272.89,693.89) | 12.18(-25.52,64.93) | -0.14(-0.49,0.21) |
| Bangladesh | 48789.46(38167.35,65760.92) | 105.55(83.51,141.13) | 122171.97(92990.25,169227.24) | 90.66(69.48,123.71) | 150.41(93.36,220.88) | -14.11(-33.20,9.72) | -0.33(-0.56,-0.10) |
| Barbados | 575.69(505.40,651.98) | 196.78(171.47,222.64) | 1427.57(1088.33,1793.25) | 272.49(208.05,342.52) | 147.97(93.45,207.04) | 38.47(8.87,72.49) | 1.55(1.27,1.83) |
| Belarus | 2279.63(1552.29,3094.62) | 17.72(12.08,23.93) | 3447.98(2512.19,4623.91) | 21.24(15.44,28.24) | 51.25(29.49,77.38) | 19.81(3.79,40.51) | 0.53(0.38,0.69) |
| Belgium | 6754.30(5242.83,8261.71) | 42.90(33.35,52.33) | 10261.96(7826.24,12784.87) | 40.59(31.10,50.26) | 51.93(34.06,68.88) | -5.40(-14.05,2.50) | 0.39(0.14,0.64) |
| Belize | 218.12(190.28,251.30) | 237.16(206.30,273.55) | 1265.19(1034.49,1506.37) | 430.21(356.15,509.41) | 480.05(393.94,556.50) | 81.40(56.60,105.12) | 2.38(1.93,2.84) |
| Benin | 2248.16(1757.12,2954.52) | 118.16(91.83,152.42) | 5992.33(4468.54,8243.73) | 125.61(93.70,169.86) | 166.54(112.07,234.03) | 6.30(-15.32,32.31) | 0.12(0.03,0.22) |
| Bermuda | 94.60(82.53,109.96) | 153.74(134.18,178.10) | 205.14(166.98,255.83) | 146.17(119.77,181.06) | 116.85(83.82,159.39) | -4.92(-19.27,12.56) | 0.26(-0.04,0.55) |
| Bhutan | 323.38(224.79,462.33) | 135.41(95.93,193.77) | 897.44(626.57,1280.43) | 151.42(105.68,215.48) | 177.52(100.72,273.31) | 11.82(-18.06,48.69) | 0.38(0.31,0.45) |
| Bolivia (Plurinational State of) | 10061.06(7812.17,13252.49) | 334.91(262.66,439.10) | 39241.79(27837.05,54433.49) | 453.96(329.56,620.26) | 290.04(186.85,439.05) | 35.55(-0.02,87.21) | 1.07(0.96,1.18) |
| Bosnia and Herzegovina | 1725.03(1321.10,2199.38) | 44.37(34.27,56.17) | 3137.42(2412.33,3888.25) | 48.81(37.65,60.31) | 81.88(42.02,136.74) | 10.02(-13.16,40.55) | 0.40(0.11,0.69) |
| Botswana | 436.94(309.93,621.81) | 82.83(60.97,116.50) | 1346.28(959.14,1837.81) | 98.04(71.09,130.23) | 208.11(141.13,295.60) | 18.36(-6.76,51.04) | 0.58(0.42,0.74) |
| Brazil | 122841.17(103531.04,142764.01) | 143.93(121.60,165.84) | 386539.71(326553.74,444653.43) | 154.88(130.72,177.55) | 214.67(198.76,231.93) | 7.61(2.78,12.03) | 0.24(0.05,0.42) |
| Brunei Darussalam | 300.70(242.84,376.49) | 333.18(271.01,419.71) | 906.90(745.91,1108.34) | 308.44(253.55,372.92) | 201.59(140.65,273.35) | -7.42(-25.52,14.00) | 0.14(-0.03,0.31) |
| Bulgaria | 3268.04(2527.56,4128.19) | 27.36(21.84,34.17) | 7243.27(5558.60,9369.61) | 50.29(38.45,64.90) | 121.64(82.66,165.83) | 83.81(54.27,120.83) | 2.52(2.21,2.83) |
| Burkina Faso | 4483.95(3297.02,5904.28) | 111.08(83.73,145.16) | 10274.19(7753.72,14026.97) | 119.78(90.20,161.44) | 129.13(78.03,185.99) | 7.83(-16.89,34.59) | 0.23(0.17,0.29) |
| Burundi | 4947.86(3589.13,6692.04) | 225.19(165.91,306.95) | 8486.55(5801.76,12207.29) | 197.75(133.72,287.07) | 71.52(26.78,135.29) | -12.19(-34.84,17.61) | -0.81(-0.96,-0.66) |
| Cabo Verde | 147.83(117.24,188.02) | 63.78(50.90,80.79) | 471.74(312.92,638.30) | 110.48(72.06,148.62) | 219.11(126.03,307.19) | 73.22(21.03,120.16) | 1.51(1.28,1.75) |
| Cambodia | 8260.71(6221.14,10636.14) | 180.12(137.35,226.58) | 23012.11(16878.02,30136.87) | 186.40(138.00,241.24) | 178.57(95.17,276.37) | 3.49(-26.41,39.46) | 0.02(-0.12,0.15) |
| Cameroon | 8716.16(6153.50,11999.96) | 211.51(150.44,288.97) | 26909.44(18414.81,38374.61) | 231.05(161.07,328.25) | 208.73(138.78,306.57) | 9.24(-14.47,43.67) | 0.42(0.21,0.63) |
| Canada | 13319.08(11001.86,15753.34) | 40.67(33.60,48.06) | 38749.77(31820.93,46473.54) | 52.26(43.41,61.64) | 190.93(163.55,221.75) | 28.48(17.14,40.03) | 1.22(1.02,1.41) |
| Central African Republic | 2252.21(1633.69,3136.77) | 209.40(154.67,283.10) | 4303.00(3000.73,6162.60) | 208.98(150.51,291.80) | 91.06(48.11,149.56) | -0.20(-21.30,26.27) | -0.03(-0.07,0.01) |
| Chad | 2630.78(1930.21,3671.94) | 96.99(72.42,133.00) | 6182.80(4358.86,8921.75) | 114.85(83.32,162.97) | 135.02(82.46,197.17) | 18.41(-5.97,47.89) | 0.39(0.23,0.55) |
| Chile | 6761.75(5433.08,8403.93) | 69.24(55.96,85.76) | 20392.67(16421.68,25032.02) | 78.12(62.81,96.02) | 201.59(173.99,231.39) | 12.83(3.85,21.45) | 0.78(0.38,1.19) |
| China | 1231517.62(1022060.65,1492724.53) | 155.94(131.16,188.26) | 2537069.54(2044337.84,3072896.74) | 122.15(99.62,146.99) | 106.01(65.65,148.70) | -21.67(-36.98,-5.72) | -0.70(-0.81,-0.59) |
| Colombia | 16991.24(13774.68,20573.62) | 101.51(83.57,122.10) | 46901.55(37145.17,59082.98) | 84.85(67.04,107.50) | 176.03(137.80,218.11) | -16.41(-27.45,-4.44) | -0.46(-0.59,-0.33) |
| Comoros | 362.96(258.31,495.91) | 200.54(146.57,269.04) | 932.58(646.73,1333.68) | 207.13(144.60,295.54) | 156.94(85.95,256.79) | 3.29(-23.46,40.50) | -0.07(-0.18,0.03) |
| Congo | 2392.14(1701.36,3235.98) | 240.47(171.27,320.29) | 5738.24(3761.27,7876.92) | 233.63(152.76,320.62) | 139.88(83.47,201.95) | -2.84(-23.74,18.78) | -0.29(-0.41,-0.18) |
| Cook Islands | 31.20(24.64,40.68) | 261.39(209.26,341.20) | 81.68(64.17,100.79) | 315.58(248.56,388.02) | 161.78(77.88,260.45) | 20.73(-18.30,66.25) | 0.67(0.59,0.75) |
| Costa Rica | 1737.64(1403.16,2077.17) | 101.84(82.60,121.37) | 9424.35(7602.58,11557.21) | 170.52(137.55,209.26) | 442.36(379.72,521.20) | 67.44(48.55,91.43) | 1.79(1.48,2.09) |
| Côte d'Ivoire | 3979.00(2956.79,5320.51) | 109.53(83.35,145.63) | 11837.06(8338.24,16025.40) | 114.89(82.70,154.11) | 96.81(67.95,134.73) | 22.08(6.04,42.34) | -0.03(-0.14,0.07) |
| Croatia | 1937.98(1521.54,2366.60) | 32.99(25.76,40.01) | 3814.06(2918.48,4906.21) | 40.27(30.85,51.53) | 260.28(212.22,311.56) | 85.17(60.91,110.92) | 0.52(0.29,0.74) |
| Cuba | 8965.37(7861.69,10179.31) | 88.20(77.38,100.03) | 32300.77(27394.58,38536.99) | 163.32(139.29,194.97) | 82.48(46.36,118.43) | -41.15(-52.00,-28.83) | 2.50(2.21,2.80) |
| Cyprus | 687.98(512.97,931.23) | 110.84(83.34,148.57) | 1255.45(962.31,1615.95) | 65.23(50.41,82.82) | 35.38(16.80,57.59) | -15.41(-26.39,-2.24) | -1.86(-2.05,-1.67) |
| Czechia | 4306.81(3376.00,5370.31) | 31.06(24.64,38.55) | 5830.64(4484.46,7373.31) | 26.27(20.38,32.99) | 197.49(137.56,281.06) | 4.90(-14.86,32.22) | -0.51(-0.62,-0.41) |
| Democratic People's Republic of Korea | 27580.05(20670.52,35601.68) | 177.94(134.37,229.99) | 59436.79(46854.70,75619.48) | 181.29(143.30,229.39) | 115.51(58.94,188.66) | 1.89(-24.18,35.65) | 0.16(0.05,0.27) |
| Democratic Republic of the Congo | 27598.86(20370.56,37375.86) | 194.58(149.07,260.20) | 66681.68(46001.81,95341.40) | 199.95(139.57,283.06) | 141.61(71.79,238.89) | 2.76(-25.99,42.31) | -0.04(-0.13,0.05) |
| Denmark | 2409.75(1803.71,3029.78) | 28.82(21.65,36.20) | 5961.08(4950.09,7076.41) | 46.18(38.24,55.10) | 147.37(115.82,193.53) | 60.24(40.82,87.46) | 1.52(1.38,1.67) |
| Djibouti | 195.53(135.81,282.94) | 166.84(118.97,237.52) | 1295.21(900.55,1867.83) | 236.91(168.52,334.59) | 562.40(336.00,855.63) | 42.00(-3.11,98.93) | 1.13(1.00,1.25) |
| Dominica | 183.37(153.98,219.74) | 307.82(259.29,366.85) | 393.15(297.57,500.38) | 469.96(361.26,592.11) | 114.40(70.68,167.38) | 52.67(23.32,89.32) | 1.58(1.50,1.66) |
| Dominican Republic | 4812.73(3837.89,6177.78) | 135.77(109.23,174.57) | 20647.47(13772.61,27777.84) | 207.83(139.10,278.74) | 329.02(182.28,470.67) | 53.07(0.20,103.12) | 2.01(1.81,2.21) |
| Ecuador | 8543.72(7174.10,9980.65) | 170.63(144.20,198.93) | 50343.06(36299.52,72169.79) | 314.54(229.48,447.70) | 489.24(332.66,719.95) | 84.33(36.68,153.12) | 2.06(1.16,2.97) |
| Egypt | 45995.66(32277.99,70285.85) | 189.75(133.89,291.06) | 162106.26(118194.62,219966.20) | 281.34(206.20,377.51) | 252.44(113.42,379.37) | 48.27(-10.66,102.11) | 1.51(1.42,1.61) |
| El Salvador | 3789.76(2937.02,5389.47) | 129.44(99.81,184.53) | 21261.09(14585.20,28952.10) | 346.48(237.44,473.54) | 461.01(244.75,633.46) | 167.68(63.19,249.59) | 3.33(2.86,3.80) |
| Equatorial Guinea | 353.79(258.70,490.61) | 193.28(142.03,259.68) | 1072.55(641.32,1584.60) | 236.23(135.11,341.58) | 203.16(89.05,343.64) | 22.22(-24.19,75.73) | 0.91(0.52,1.29) |
| Eritrea | 2005.82(1400.68,2979.51) | 193.49(137.07,280.68) | 5218.82(3488.44,8382.71) | 216.32(143.82,349.72) | 160.18(103.23,241.13) | 11.80(-13.10,47.39) | 0.35(0.26,0.43) |
| Estonia | 566.41(413.38,721.64) | 27.54(20.14,34.99) | 1779.35(1467.08,2180.12) | 59.07(48.53,71.64) | 214.15(154.45,290.61) | 114.52(77.36,161.20) | 2.45(2.23,2.67) |
| Eswatini | 388.29(288.72,521.44) | 143.94(108.48,193.16) | 1073.14(671.83,1517.63) | 198.16(125.95,276.77) | 176.38(100.87,270.51) | 37.67(1.42,82.26) | 1.20(0.56,1.85) |
| Ethiopia | 103427.55(80073.80,127616.20) | 563.31(449.88,690.90) | 127070.84(101302.11,155532.96) | 326.02(261.55,393.64) | 22.86(-0.56,53.73) | -42.12(-52.73,-28.74) | -2.18(-2.33,-2.03) |
| Fiji | 1383.27(974.04,1982.14) | 400.90(287.73,581.71) | 4790.44(3510.34,6395.40) | 656.72(493.13,858.82) | 246.31(108.01,459.06) | 63.81(-3.23,161.18) | 1.21(0.90,1.53) |
| Finland | 1869.64(1436.24,2308.07) | 25.77(19.73,31.79) | 4259.84(3512.75,5132.58) | 29.85(24.29,36.10) | 127.84(99.36,160.80) | 15.83(3.46,29.22) | 0.93(0.74,1.11) |
| France | 25174.51(19772.81,31858.36) | 28.95(22.79,36.21) | 45904.79(37301.81,55190.79) | 28.25(22.94,34.48) | 82.35(60.07,111.99) | -2.42(-14.16,11.02) | -0.05(-0.22,0.12) |
| Gabon | 1193.32(878.25,1605.20) | 219.19(162.68,291.45) | 2907.12(1588.72,4131.31) | 306.17(164.28,442.77) | 143.62(62.35,219.90) | 39.68(-8.16,82.76) | 1.05(0.89,1.21) |
| Gambia | 365.47(270.28,498.80) | 112.86(84.31,154.28) | 1290.74(921.90,1811.97) | 141.79(100.54,200.16) | 253.18(156.05,379.48) | 25.63(-8.45,67.02) | 0.58(0.47,0.70) |
| Georgia | 2389.84(1812.11,3092.20) | 38.39(28.86,49.52) | 4086.58(3155.59,5197.62) | 69.13(53.49,87.89) | 71.00(43.16,110.89) | 80.06(50.97,122.16) | 2.36(1.97,2.74) |
| Germany | 53682.02(41747.07,65529.30) | 41.17(32.42,50.09) | 115379.73(88836.83,146701.38) | 51.87(40.85,64.94) | 114.93(85.32,152.62) | 26.01(11.96,43.03) | 1.02(0.80,1.25) |
| Ghana | 6377.55(4510.06,9318.46) | 113.20(81.80,161.80) | 28050.66(20403.61,38586.64) | 186.47(137.09,257.94) | 339.83(180.79,498.71) | 64.73(3.70,120.77) | 2.08(1.88,2.28) |
| Greece | 12478.00(9978.15,15486.53) | 82.37(66.67,102.49) | 23490.36(19694.40,26871.93) | 85.83(72.84,97.41) | 88.25(62.91,121.38) | 4.19(-9.64,20.20) | -0.26(-0.88,0.37) |
| Greenland | 23.08(18.58,29.24) | 77.98(63.30,96.86) | 56.19(42.38,71.64) | 85.05(65.36,106.95) | 143.47(95.34,203.24) | 9.07(-11.65,34.34) | 0.67(0.51,0.83) |
| Grenada | 237.10(199.96,282.24) | 335.76(280.35,395.27) | 623.62(515.27,758.26) | 548.59(455.63,660.56) | 163.02(124.58,206.09) | 63.39(40.17,90.89) | 1.93(1.73,2.13) |
| Guam | 163.47(137.72,203.22) | 231.52(197.78,285.96) | 645.46(543.59,743.64) | 302.94(256.13,349.56) | 294.85(209.36,381.31) | 30.85(2.84,57.55) | 1.65(1.23,2.06) |
| Guatemala | 5032.63(4044.40,6136.90) | 158.95(128.56,194.56) | 27322.67(20646.47,35908.54) | 252.33(191.26,332.72) | 442.91(343.45,548.20) | 58.75(29.46,89.16) | 2.29(1.87,2.72) |
| Guinea | 2569.34(1904.93,3482.05) | 81.18(60.70,109.27) | 4682.74(3347.54,6607.34) | 88.70(63.56,124.63) | 82.25(45.28,130.24) | 9.27(-12.03,38.10) | 0.21(0.16,0.27) |
| Guinea-Bissau | 627.20(456.75,851.76) | 166.85(125.08,224.95) | 1034.31(760.30,1451.97) | 154.58(115.09,209.27) | 64.91(26.13,117.69) | -7.35(-27.68,19.90) | -0.31(-0.35,-0.27) |
| Guyana | 1067.10(889.27,1284.88) | 290.30(244.74,346.25) | 3534.65(2693.41,4615.57) | 544.36(422.96,704.55) | 231.24(145.07,327.72) | 87.52(40.37,138.89) | 3.05(2.69,3.41) |
| Haiti | 8415.69(5928.28,13814.14) | 266.30(188.68,446.93) | 20306.55(11562.28,42729.26) | 290.87(165.41,614.20) | 141.29(54.52,244.77) | 9.22(-29.03,53.17) | 0.51(0.43,0.59) |
| Honduras | 1612.03(1235.23,2057.11) | 80.45(62.26,102.54) | 8839.26(6518.72,11689.27) | 143.28(105.67,189.72) | 448.33(298.27,631.27) | 78.11(29.37,133.44) | 2.15(1.97,2.33) |
| Hungary | 3437.95(2688.13,4360.51) | 23.42(18.21,29.57) | 6071.83(4729.15,7776.79) | 29.61(23.17,37.59) | 76.61(54.80,108.25) | 26.46(12.31,46.46) | 1.34(1.06,1.61) |
| Iceland | 51.94(39.12,65.63) | 17.76(13.38,22.47) | 127.52(97.10,157.67) | 21.17(15.88,26.35) | 145.51(118.39,177.41) | 19.22(6.37,34.82) | 0.59(0.47,0.70) |
| India | 491273.27(396488.14,598466.05) | 106.74(86.92,129.16) | 1592175.86(1286480.17,1952846.58) | 133.63(108.33,164.01) | 224.09(157.74,284.18) | 25.19(-1.06,48.37) | 0.71(0.62,0.80) |
| Indonesia | 151287.02(123166.78,190237.19) | 151.56(124.57,191.36) | 472034.46(375409.16,592078.45) | 194.82(155.78,244.68) | 212.01(144.15,274.52) | 28.54(0.80,52.74) | 0.84(0.78,0.90) |
| Iran (Islamic Republic of) | 24635.13(18256.62,33174.17) | 102.10(76.39,136.28) | 79343.84(61424.66,96709.34) | 107.81(83.56,132.60) | 222.08(128.44,294.37) | 5.60(-26.01,28.89) | 0.34(0.23,0.44) |
| Iraq | 16049.76(11839.74,22025.30) | 206.12(151.01,283.15) | 50450.18(31991.96,69021.70) | 225.51(145.20,308.30) | 214.34(96.24,348.77) | 9.41(-30.70,54.93) | 0.05(-0.10,0.21) |
| Ireland | 1953.07(1490.67,2463.53) | 47.15(35.96,58.66) | 3680.62(2818.39,4600.01) | 44.87(34.55,56.72) | 88.45(68.96,112.60) | -4.83(-13.92,6.14) | 0.09(0.00,0.17) |
| Israel | 4442.75(3580.86,5434.74) | 92.45(75.39,113.62) | 10918.93(8730.22,13516.82) | 83.34(67.23,102.34) | 145.77(121.15,170.43) | -9.85(-16.91,-3.66) | 0.11(-0.38,0.61) |
| Italy | 33917.77(27153.83,41662.08) | 37.59(30.03,45.82) | 52794.19(40916.39,67565.20) | 31.66(24.85,39.27) | 55.65(38.02,76.10) | -15.77(-22.35,-8.78) | -0.53(-0.60,-0.47) |
| Jamaica | 3782.63(3237.63,4382.82) | 209.15(179.05,241.82) | 8268.83(6134.29,10963.99) | 265.55(195.97,353.34) | 118.60(69.34,184.05) | 26.97(-1.20,65.82) | 0.28(-0.32,0.89) |
| Japan | 146073.54(123219.20,168922.89) | 87.95(73.98,101.60) | 307815.76(242832.40,371079.73) | 73.52(60.41,85.93) | 110.73(86.58,132.60) | -16.41(-20.17,-13.12) | -0.51(-0.64,-0.38) |
| Jordan | 2725.22(2076.22,3557.99) | 221.42(167.70,285.37) | 14983.52(11301.90,19351.09) | 221.03(166.13,289.49) | 449.81(279.64,653.71) | -0.17(-31.42,36.04) | -0.24(-0.60,0.13) |
| Kazakhstan | 6025.41(4552.04,7689.70) | 47.17(35.86,59.56) | 12256.78(9434.22,15298.95) | 69.08(53.40,86.44) | 103.42(72.65,139.83) | 46.46(25.01,73.66) | 1.12(0.95,1.29) |
| Kenya | 10374.64(7696.83,16239.45) | 139.26(103.48,214.01) | 42905.15(31509.17,58831.61) | 210.70(154.30,279.17) | 313.56(217.83,421.21) | 51.30(15.83,91.90) | 1.55(1.46,1.65) |
| Kiribati | 158.61(128.12,196.35) | 441.38(357.71,543.33) | 425.25(280.04,629.44) | 608.02(403.18,886.57) | 168.11(62.48,313.87) | 37.76(-14.60,109.64) | 0.82(0.53,1.11) |
| Kuwait | 883.20(690.34,1110.75) | 152.48(120.99,189.87) | 2166.40(1627.04,2836.74) | 78.32(56.75,103.40) | 145.29(96.67,197.45) | -48.64(-58.98,-37.00) | -2.05(-2.29,-1.80) |
| Kyrgyzstan | 1217.63(921.72,1552.26) | 40.73(31.09,52.22) | 2889.41(2248.23,3660.17) | 58.55(45.51,73.78) | 137.30(101.76,181.60) | 43.75(23.59,69.01) | 0.56(0.08,1.03) |
| Lao People's Democratic Republic | 8072.38(5918.20,10908.39) | 387.74(294.32,514.81) | 16045.43(11524.40,22185.78) | 352.12(253.22,480.14) | 98.77(40.95,171.74) | -9.19(-34.76,22.56) | -0.43(-0.48,-0.39) |
| Latvia | 760.57(544.36,1010.28) | 21.14(15.14,28.08) | 1444.12(1073.63,1844.40) | 34.08(25.43,43.43) | 89.87(60.45,136.37) | 61.20(37.96,95.59) | 1.80(1.65,1.96) |
| Lebanon | 2906.32(2005.20,4124.38) | 140.70(97.94,196.53) | 7757.16(5933.52,10049.65) | 125.43(95.90,163.28) | 166.91(97.00,270.64) | -10.85(-33.65,19.60) | -0.21(-0.33,-0.09) |
| Lesotho | 532.84(392.77,710.74) | 65.09(48.52,86.27) | 1306.01(908.92,1874.29) | 124.82(88.90,178.04) | 145.11(81.41,221.79) | 91.78(44.06,150.51) | 2.73(2.37,3.09) |
| Liberia | 1568.32(1149.35,2125.69) | 144.35(107.29,191.01) | 3027.35(2136.30,4131.23) | 157.00(112.30,218.43) | 93.03(42.30,155.22) | 8.77(-19.65,42.54) | 0.45(0.20,0.69) |
| Libya | 2147.25(1497.95,3097.27) | 117.23(82.52,169.03) | 9731.60(5951.43,13685.83) | 191.62(117.57,267.81) | 353.21(146.31,590.40) | 63.46(-11.47,149.40) | 2.17(1.97,2.36) |
| Lithuania | 921.27(663.41,1205.29) | 20.32(14.60,26.53) | 1710.28(1310.21,2196.06) | 28.38(21.68,36.43) | 85.64(57.65,123.35) | 39.62(19.55,67.22) | 0.87(0.74,0.99) |
| Luxembourg | 238.29(187.54,297.98) | 43.62(34.40,54.44) | 538.18(418.56,684.09) | 47.60(37.14,60.31) | 125.85(98.36,159.65) | 9.12(-2.53,22.63) | 0.51(0.38,0.64) |
| Madagascar | 7125.53(5104.95,10463.77) | 151.74(109.50,226.24) | 15263.07(10485.48,21092.76) | 155.10(108.04,216.35) | 114.20(51.07,188.43) | 2.21(-28.11,35.94) | 0.10(0.01,0.18) |
| Malawi | 7140.69(5095.43,9649.46) | 203.94(151.31,268.79) | 16263.04(11824.13,21689.60) | 242.87(180.90,318.94) | 127.75(72.84,190.05) | 19.09(-9.95,50.11) | 0.36(0.14,0.59) |
| Malaysia | 20634.52(17393.69,24265.77) | 227.65(193.32,265.45) | 76737.54(63050.25,91298.78) | 274.36(225.51,323.23) | 271.89(202.85,332.57) | 20.52(-1.30,40.13) | 0.41(0.24,0.58) |
| Maldives | 353.65(278.17,459.21) | 407.37(321.80,549.83) | 724.99(571.59,908.04) | 229.60(181.91,282.48) | 105.00(50.67,163.12) | -43.64(-58.84,-27.37) | -2.19(-2.40,-1.97) |
| Mali | 4637.29(3365.83,6212.33) | 125.71(94.52,165.10) | 10175.04(7532.22,14321.14) | 125.63(95.33,175.96) | 119.42(75.78,176.45) | -0.06(-18.83,26.64) | 0.09(-0.03,0.20) |
| Malta | 209.09(165.15,258.82) | 50.25(40.01,62.05) | 527.89(412.95,652.21) | 50.62(39.70,62.53) | 152.47(124.96,182.99) | 0.75(-8.56,10.41) | -0.02(-0.19,0.14) |
| Marshall Islands | 73.94(47.66,132.91) | 470.45(302.10,844.64) | 262.11(89.94,741.50) | 759.89(264.01,2194.26) | 254.47(64.73,470.96) | 61.52(-24.20,163.16) | 1.56(1.34,1.78) |
| Mauritania | 1338.92(942.06,1858.84) | 140.97(100.01,192.54) | 2662.10(1758.67,3929.61) | 132.25(86.82,195.68) | 98.82(53.91,158.85) | -6.19(-27.16,21.73) | -0.53(-0.68,-0.38) |
| Mauritius | 2905.42(2491.95,3342.37) | 405.49(353.01,465.28) | 13623.23(11678.55,15634.32) | 726.57(630.29,830.36) | 368.89(330.79,406.24) | 79.18(64.87,92.16) | 2.14(1.71,2.56) |
| Mexico | 74465.55(61008.85,88423.95) | 190.73(157.77,225.84) | 385118.84(296154.08,481772.74) | 304.10(236.78,379.24) | 417.18(355.07,491.97) | 59.44(40.30,80.93) | 2.06(1.37,2.75) |
| Micronesia (Federated States of) | 225.19(155.12,342.52) | 479.40(328.63,748.34) | 577.21(407.07,823.70) | 803.05(581.84,1141.94) | 156.32(55.40,309.84) | 67.51(2.99,160.95) | 1.65(1.24,2.05) |
| Monaco | 23.93(18.58,31.85) | 31.94(24.81,41.37) | 44.22(34.60,56.86) | 41.00(31.85,52.40) | 84.76(54.19,125.76) | 28.34(9.03,53.32) | 0.92(0.78,1.06) |
| Mongolia | 805.17(610.09,1051.16) | 76.54(58.50,99.26) | 1513.91(1135.54,1926.28) | 65.73(50.22,82.17) | 88.02(56.51,124.35) | -14.13(-28.76,2.95) | -0.80(-0.92,-0.68) |
| Montenegro | 230.04(175.09,293.70) | 37.50(28.65,47.96) | 468.06(343.03,617.33) | 48.49(35.88,63.57) | 103.47(56.66,161.44) | 29.30(-0.04,64.82) | 0.98(0.90,1.07) |
| Morocco | 11399.15(7439.14,19128.38) | 82.20(53.19,141.39) | 45810.35(32573.88,62270.67) | 136.87(96.96,183.21) | 301.88(148.89,460.36) | 66.50(1.26,134.02) | 2.12(1.93,2.31) |
| Mozambique | 7251.82(5208.21,10715.49) | 138.44(103.83,203.52) | 18639.48(13397.05,28604.85) | 192.16(138.88,293.24) | 157.03(82.09,245.57) | 38.80(-0.97,85.34) | 1.47(1.32,1.62) |
| Myanmar | 53312.69(39221.39,71348.48) | 227.89(169.94,297.80) | 102103.30(79801.36,132671.36) | 211.83(167.73,273.01) | 91.52(40.60,164.59) | -7.05(-31.25,27.18) | -0.46(-0.55,-0.38) |
| Namibia | 500.20(363.67,694.75) | 81.41(60.24,110.69) | 1221.36(885.23,1650.50) | 93.54(68.08,126.32) | 144.18(91.24,211.56) | 14.90(-9.08,45.06) | 0.27(0.03,0.52) |
| Nauru | 25.52(16.26,39.51) | 579.75(368.37,937.62) | 49.03(34.63,70.47) | 876.15(608.80,1347.34) | 92.15(27.39,198.78) | 51.13(1.12,133.99) | 1.21(1.07,1.34) |
| Nepal | 11132.35(8240.78,14841.48) | 119.56(90.67,158.31) | 36970.75(27229.32,50286.95) | 160.44(117.70,215.41) | 232.10(135.63,345.78) | 34.19(-6.63,78.43) | 0.96(0.61,1.31) |
| Netherlands | 6029.00(4607.34,7578.98) | 29.76(22.78,37.43) | 13682.22(10975.97,16691.25) | 36.66(29.16,45.22) | 126.94(101.46,155.55) | 23.19(9.88,38.06) | 0.57(0.31,0.83) |
| New Zealand | 1026.26(801.54,1255.62) | 26.71(20.87,32.52) | 2960.16(2353.91,3582.13) | 35.13(27.79,42.56) | 188.44(163.87,213.21) | 31.56(21.03,42.21) | 0.97(0.53,1.41) |
| Nicaragua | 2383.69(1880.59,3169.64) | 158.80(125.44,210.58) | 14389.08(10865.27,19099.06) | 295.37(224.92,391.68) | 503.65(339.13,646.28) | 86.00(35.68,129.72) | 2.50(2.11,2.89) |
| Niger | 1990.51(1445.86,2748.32) | 78.12(56.43,105.73) | 5397.00(3840.87,8020.94) | 71.64(52.10,103.77) | 171.14(113.53,248.48) | -8.29(-26.66,15.62) | -0.33(-0.43,-0.24) |
| Nigeria | 44700.07(34161.42,56886.83) | 109.32(84.61,138.43) | 85602.57(64811.62,109888.66) | 104.22(80.15,134.15) | 91.50(55.57,133.91) | -4.67(-21.55,13.55) | -0.62(-0.86,-0.39) |
| Niue | 9.53(7.39,12.69) | 427.28(328.15,574.00) | 15.88(9.49,23.98) | 738.08(444.21,1110.50) | 66.67(-8.09,157.48) | 72.74(-3.37,166.64) | 1.72(1.55,1.89) |
| North Macedonia | 704.36(542.66,899.47) | 38.61(29.82,48.78) | 1472.50(1086.97,1945.38) | 45.41(33.79,58.77) | 109.06(72.52,153.29) | 17.61(-2.63,42.91) | 0.61(0.18,1.04) |
| Northern Mariana Islands | 89.40(69.41,119.54) | 557.14(453.99,696.14) | 427.56(344.81,535.83) | 850.92(706.61,1023.86) | 378.25(253.56,539.61) | 52.73(16.68,97.30) | 1.54(1.37,1.71) |
| Norway | 1610.89(1225.93,2038.81) | 23.14(17.56,29.19) | 2698.69(2074.94,3373.60) | 25.44(19.46,31.74) | 67.53(54.14,84.65) | 9.98(2.02,19.76) | 0.34(0.16,0.52) |
| Oman | 792.32(558.85,1149.12) | 123.06(86.03,176.70) | 3570.49(2635.80,5034.50) | 199.53(147.47,271.83) | 350.64(219.22,531.89) | 62.14(12.27,128.57) | 2.08(1.85,2.30) |
| Pakistan | 75133.45(56065.12,98474.32) | 136.20(102.38,178.55) | 224592.98(171262.12,295483.90) | 189.61(145.78,248.34) | 198.93(129.35,276.75) | 39.21(8.17,75.96) | 0.85(0.63,1.07) |
| Palau | 39.36(28.92,51.65) | 420.80(313.43,547.41) | 140.48(99.23,189.05) | 662.69(481.37,885.25) | 256.91(129.95,449.45) | 57.48(2.25,136.66) | 1.61(1.41,1.81) |
| Palestine | 1508.56(1077.02,2125.40) | 184.37(132.46,258.33) | 4081.93(3153.28,5428.55) | 176.37(135.79,235.15) | 170.58(94.36,277.15) | -4.33(-30.77,30.94) | -0.16(-0.41,0.08) |
| Panama | 1216.38(975.40,1501.45) | 83.34(67.12,102.08) | 7141.44(5383.30,9420.97) | 161.34(121.75,213.66) | 487.11(363.59,610.21) | 93.60(53.97,134.23) | 2.39(2.04,2.75) |
| Papua New Guinea | 3190.54(2263.38,4436.98) | 175.43(127.37,241.47) | 10399.49(7930.55,14117.78) | 203.52(156.86,278.22) | 225.95(116.81,391.88) | 16.01(-21.64,70.60) | 0.47(0.43,0.50) |
| Paraguay | 2753.93(2158.39,3390.93) | 128.91(101.14,158.89) | 11273.92(8082.69,15123.49) | 198.97(143.80,266.80) | 309.38(196.91,440.73) | 54.34(12.71,104.62) | 1.49(1.37,1.61) |
| Peru | 22076.87(17490.75,27456.53) | 194.16(153.06,240.80) | 75915.27(51851.82,105251.59) | 229.73(156.89,320.57) | 243.87(143.53,350.37) | 18.32(-16.38,55.04) | 0.33(0.12,0.54) |
| Philippines | 67219.69(56021.78,81325.08) | 243.11(205.41,288.46) | 288084.63(232045.07,358895.06) | 350.69(285.58,429.65) | 328.57(242.13,407.67) | 44.25(17.86,69.79) | 1.58(1.44,1.73) |
| Poland | 19389.80(15534.89,23974.63) | 44.49(35.84,54.64) | 21451.76(16874.70,26511.70) | 29.29(22.99,36.38) | 10.63(-0.91,23.42) | -34.16(-40.72,-26.46) | -1.67(-2.01,-1.32) |
| Portugal | 7319.72(5890.13,9043.74) | 53.35(43.37,66.91) | 15125.18(11644.94,19178.89) | 53.17(42.38,66.17) | 106.64(78.78,141.74) | -0.34(-10.21,10.60) | 0.16(-0.29,0.61) |
| Puerto Rico | 10497.14(9183.24,11850.48) | 292.80(257.13,331.53) | 23929.72(19911.72,28145.37) | 323.42(266.70,379.13) | 127.96(87.54,173.00) | 10.46(-8.93,31.65) | 1.02(0.60,1.45) |
| Qatar | 159.90(99.83,237.51) | 177.57(108.74,277.42) | 1241.23(918.34,1744.93) | 167.90(125.48,228.71) | 676.26(423.98,1183.32) | -5.45(-37.92,61.05) | -0.47(-1.02,0.08) |
| Republic of Korea | 30720.78(26135.61,35117.89) | 117.06(100.85,135.19) | 77180.07(63601.17,92172.18) | 82.17(67.76,98.27) | 151.23(109.96,194.12) | -29.81(-41.40,-18.37) | -0.71(-0.94,-0.49) |
| Republic of Moldova | 1100.85(769.09,1462.12) | 25.84(18.12,34.05) | 1911.27(1374.92,2557.64) | 31.82(22.92,42.73) | 73.62(53.44,100.18) | 23.13(9.14,40.10) | 0.51(0.41,0.62) |
| Romania | 5634.98(4186.23,7470.20) | 20.68(15.28,26.91) | 10491.81(8223.05,12820.11) | 28.05(21.76,34.04) | 86.19(54.75,124.42) | 35.62(14.09,62.53) | 1.56(1.21,1.92) |
| Russian Federation | 41389.01(32207.86,51655.04) | 23.24(18.14,28.95) | 68671.47(54629.96,85188.07) | 28.15(22.52,34.59) | 65.92(47.01,87.86) | 21.11(8.26,36.35) | 0.41(0.22,0.60) |
| Rwanda | 5987.76(4340.38,8041.83) | 228.33(168.64,306.13) | 9690.19(6801.05,14207.15) | 173.21(121.43,249.59) | 61.83(17.70,118.25) | -24.14(-44.70,1.41) | -1.75(-2.10,-1.39) |
| Saint Kitts and Nevis | 150.52(129.24,176.66) | 397.06(340.28,463.63) | 357.29(275.68,446.51) | 534.53(426.45,651.33) | 137.36(88.88,180.92) | 34.62(8.73,55.94) | 1.86(1.56,2.16) |
| Saint Lucia | 279.95(239.91,320.05) | 329.78(285.16,375.88) | 855.99(679.73,1049.53) | 356.77(286.03,436.66) | 205.76(152.40,263.79) | 8.18(-10.41,28.51) | 0.60(0.33,0.88) |
| Saint Vincent and the Grenadines | 169.51(146.53,197.22) | 240.72(208.90,279.21) | 513.46(428.66,611.42) | 363.11(304.23,429.91) | 202.91(160.20,246.88) | 50.85(30.60,72.49) | 1.89(1.59,2.20) |
| Samoa | 356.09(260.30,491.88) | 438.28(323.24,594.69) | 845.46(645.61,1108.77) | 602.10(460.61,777.71) | 137.43(65.53,256.82) | 37.38(-3.58,103.27) | 0.94(0.82,1.06) |
| San Marino | 10.63(8.21,13.29) | 29.38(22.65,36.92) | 21.28(15.34,27.95) | 26.44(18.53,34.31) | 100.17(67.66,135.70) | -10.00(-25.49,4.83) | 0.16(-0.01,0.33) |
| Sao Tome and Principe | 109.87(84.73,143.29) | 177.97(138.02,229.39) | 250.79(174.90,331.61) | 246.31(170.54,324.43) | 128.25(72.36,182.16) | 38.40(2.08,70.42) | 1.05(0.94,1.16) |
| Saudi Arabia | 13836.25(9622.82,19789.70) | 245.92(171.11,347.85) | 81716.44(56876.40,110118.96) | 420.05(296.57,555.49) | 490.60(234.92,763.67) | 70.80(-1.76,141.29) | 1.52(1.32,1.72) |
| Senegal | 4409.11(3255.68,5888.16) | 145.60(107.83,188.41) | 11112.43(8043.09,16022.15) | 154.68(111.58,220.46) | 152.03(92.18,241.01) | 6.24(-18.67,42.13) | 0.10(0.01,0.18) |
| Serbia | 5272.00(3992.71,6840.08) | 51.04(38.97,66.71) | 9048.65(7144.42,11169.49) | 52.74(41.64,64.73) | 71.64(31.59,125.73) | 3.33(-21.41,32.40) | 0.21(0.06,0.36) |
| Seychelles | 152.81(128.61,186.12) | 271.65(228.78,329.66) | 461.80(364.77,564.67) | 403.70(318.54,493.82) | 202.21(141.70,273.57) | 48.61(19.59,83.24) | 1.40(1.15,1.65) |
| Sierra Leone | 1942.23(1433.90,2642.34) | 99.32(74.09,134.06) | 3535.54(2529.39,4922.05) | 99.90(72.19,138.55) | 82.03(41.75,132.34) | 0.57(-19.91,26.24) | 0.03(-0.02,0.07) |
| Singapore | 2809.40(2453.05,3191.49) | 137.29(120.96,155.54) | 8556.72(7273.36,9871.79) | 101.34(85.65,116.99) | 204.58(175.05,234.42) | -26.19(-32.85,-19.17) | 0.73(0.19,1.27) |
| Slovakia | 2473.15(1877.39,3153.83) | 41.16(31.52,52.29) | 3394.77(2597.14,4279.61) | 35.18(27.16,44.45) | 37.27(16.25,60.94) | -14.53(-27.32,-0.30) | -0.44(-0.56,-0.32) |
| Slovenia | 579.82(462.41,701.21) | 23.52(18.78,28.51) | 1037.25(776.16,1354.01) | 22.14(16.43,28.93) | 78.89(52.89,115.09) | -5.85(-18.48,11.10) | -0.06(-0.24,0.13) |
| Solomon Islands | 453.32(212.32,711.82) | 327.42(176.78,506.34) | 1290.62(995.34,1681.76) | 360.05(286.72,456.79) | 184.71(78.71,461.89) | 9.97(-30.00,106.55) | 0.28(0.10,0.47) |
| Somalia | 5523.45(3721.68,8084.54) | 262.56(178.43,391.20) | 15405.17(9958.87,23536.66) | 282.27(187.80,421.04) | 178.90(107.32,274.84) | 7.51(-17.89,41.88) | 0.34(0.25,0.43) |
| South Africa | 15397.58(11785.81,19932.32) | 77.10(59.83,100.79) | 46789.87(36941.41,60270.03) | 104.90(83.91,134.60) | 203.88(147.35,248.30) | 36.05(8.74,55.14) | 1.44(1.19,1.69) |
| South Sudan | 5695.53(3858.48,8651.27) | 234.75(161.44,346.89) | 10836.49(7008.15,15459.57) | 315.04(211.80,445.28) | 90.26(13.90,172.33) | 34.20(-17.77,90.97) | 0.86(0.67,1.06) |
| Spain | 28909.31(22932.46,35792.32) | 52.56(41.91,64.83) | 44729.02(34597.85,57355.88) | 39.15(30.55,49.17) | 54.72(33.21,76.05) | -25.51(-31.92,-18.39) | -0.58(-0.77,-0.40) |
| Sri Lanka | 21804.13(17226.22,27336.02) | 213.35(169.14,267.16) | 50396.58(34954.61,69333.98) | 186.65(131.11,255.41) | 131.13(55.93,224.16) | -12.51(-40.56,22.82) | -0.48(-0.67,-0.30) |
| Sudan | 6596.39(4386.38,10890.05) | 72.16(48.52,121.73) | 18703.28(12988.67,25856.41) | 99.28(70.26,139.43) | 183.54(65.36,320.63) | 37.58(-19.13,104.88) | 0.87(0.66,1.07) |
| Suriname | 684.23(560.79,832.46) | 272.36(226.42,330.05) | 2549.23(1863.59,3371.24) | 399.72(292.37,526.07) | 272.57(170.25,400.25) | 46.76(7.06,96.19) | 1.58(1.36,1.80) |
| Sweden | 3810.31(2884.19,4788.62) | 23.90(18.17,29.74) | 8372.76(6495.94,10652.47) | 33.61(26.56,42.39) | 119.74(90.85,155.48) | 40.62(23.00,60.87) | 1.64(1.48,1.81) |
| Switzerland | 3634.58(2850.40,4523.49) | 33.92(26.29,42.40) | 7806.72(6311.79,9511.52) | 38.52(30.92,47.14) | 114.79(84.71,147.94) | 13.59(-0.75,29.49) | 0.83(0.64,1.02) |
| Syrian Arab Republic | 8566.68(6307.75,11884.66) | 170.28(124.05,230.80) | 24174.27(15997.35,34100.15) | 191.93(128.41,271.42) | 182.19(76.36,323.01) | 12.71(-31.56,66.93) | -0.04(-0.29,0.22) |
| Taiwan | 38464.27(34197.50,43008.08) | 272.80(243.93,300.29) | 100771.42(88270.11,115124.14) | 232.11(203.76,263.98) | 161.99(134.98,187.19) | -14.92(-22.11,-7.39) | 0.08(-0.20,0.37) |
| Tajikistan | 821.06(578.98,1103.64) | 30.41(21.45,41.12) | 1931.61(1377.64,2598.84) | 33.73(24.08,45.19) | 135.26(108.11,167.19) | 10.91(-1.22,26.35) | 0.21(0.12,0.31) |
| Thailand | 72070.23(58655.05,90945.50) | 211.98(173.48,267.15) | 288711.26(222565.43,367493.59) | 263.70(203.89,335.88) | 300.60(188.85,426.50) | 24.40(-8.08,58.88) | 0.51(0.44,0.58) |
| Timor-Leste | 594.47(437.42,851.88) | 217.59(165.08,302.80) | 2065.48(1465.91,2958.34) | 244.41(177.12,348.90) | 247.45(138.21,387.96) | 12.33(-19.80,53.83) | 0.54(0.35,0.73) |
| Togo | 1239.46(926.06,1622.97) | 109.17(81.57,141.61) | 4307.41(3121.21,5896.05) | 123.09(89.64,167.63) | 247.52(166.05,351.58) | 12.75(-12.30,43.95) | 0.26(0.18,0.34) |
| Tokelau | 4.74(3.33,7.99) | 358.16(250.88,594.15) | 7.33(5.27,10.55) | 492.74(355.49,701.40) | 54.47(3.96,125.30) | 37.57(-6.65,99.05) | 1.06(0.94,1.19) |
| Tonga | 119.68(87.90,160.83) | 218.87(162.26,288.20) | 244.54(177.88,317.64) | 308.87(224.03,398.88) | 104.33(48.58,189.23) | 41.12(2.64,97.78) | 0.98(0.76,1.20) |
| Trinidad and Tobago | 1851.88(1603.31,2130.40) | 228.36(199.59,261.17) | 7614.88(5633.49,10350.60) | 385.68(285.74,522.43) | 311.20(206.46,431.19) | 68.89(26.27,117.85) | 2.29(1.93,2.66) |
| Tunisia | 4545.95(3261.28,6717.40) | 95.71(69.12,141.49) | 17391.18(11982.96,24083.40) | 134.86(92.12,187.17) | 282.56(119.74,473.15) | 40.90(-18.08,107.63) | 1.12(0.93,1.31) |
| Türkiye | 45657.61(34028.93,62553.55) | 139.36(103.80,194.30) | 124432.39(96226.56,167026.02) | 136.11(105.26,179.89) | 218.13(160.35,295.18) | 50.46(23.60,87.33) | 0.51(0.20,0.83) |
| Turkmenistan | 1117.05(874.01,1391.67) | 57.42(45.23,71.58) | 3553.69(2699.73,4641.21) | 86.39(65.90,111.27) | 118.28(47.81,211.97) | 40.69(-3.98,98.81) | 1.12(0.76,1.48) |
| Tuvalu | 26.77(19.59,41.49) | 407.01(299.89,637.74) | 58.44(42.42,84.75) | 572.64(417.16,838.12) | 172.53(88.10,250.13) | -2.33(-32.60,25.30) | 1.17(1.07,1.27) |
| Uganda | 11013.96(7848.04,15256.87) | 186.83(135.31,254.98) | 29617.92(21324.76,41720.25) | 227.29(165.89,314.63) | 168.91(94.37,283.38) | 21.66(-12.05,69.24) | 0.32(0.15,0.49) |
| Ukraine | 11567.85(7683.63,16179.31) | 16.40(10.93,22.77) | 16823.49(12153.24,22955.68) | 21.40(15.41,29.08) | 45.43(25.18,70.99) | 30.47(12.83,52.35) | 1.00(0.88,1.12) |
| United Arab Emirates | 577.62(400.86,817.86) | 137.82(94.36,203.30) | 5792.78(4101.46,7780.48) | 198.97(121.58,279.67) | 902.88(593.91,1232.99) | 44.37(-6.15,99.40) | 3.07(2.44,3.70) |
| United Kingdom | 29810.62(22913.63,37592.14) | 32.63(25.08,40.73) | 49365.64(38555.01,60219.06) | 36.59(28.10,44.94) | 65.60(55.68,76.92) | 12.14(7.00,18.33) | 0.73(0.58,0.88) |
| United Republic of Tanzania | 9415.98(6734.37,13604.31) | 94.12(68.88,133.11) | 23498.33(17187.50,33128.82) | 101.39(75.34,142.09) | 149.56(83.34,231.67) | 7.72(-19.57,41.15) | 0.12(0.07,0.17) |
| United States of America | 213560.39(178505.05,248197.38) | 67.48(56.41,77.99) | 1114831.92(1005493.00,1218802.71) | 188.98(171.11,207.31) | 422.02(368.29,485.82) | 180.07(152.81,213.62) | 3.80(3.57,4.04) |
| United States Virgin Islands | 150.29(121.96,187.55) | 184.48(151.45,226.69) | 327.94(228.51,440.55) | 183.21(129.35,245.87) | 118.20(39.46,207.76) | -0.69(-36.47,40.59) | 0.28(0.01,0.54) |
| Uruguay | 2261.66(2037.44,2475.05) | 57.10(51.24,62.38) | 4053.05(3269.08,4916.66) | 69.44(56.10,85.02) | 79.21(48.73,117.31) | 21.60(1.49,46.44) | 1.18(0.87,1.50) |
| Uzbekistan | 5014.71(3650.94,6753.77) | 44.17(32.00,59.58) | 19527.31(15090.64,24921.73) | 74.55(58.04,94.82) | 289.40(211.91,389.72) | 68.80(35.04,110.50) | 1.25(0.75,1.74) |
| Vanuatu | 194.81(129.50,335.59) | 326.21(220.58,555.51) | 837.07(600.86,1280.79) | 492.05(358.57,744.67) | 329.68(188.95,545.96) | 50.84(3.98,119.45) | 1.36(1.30,1.41) |
| Venezuela (Bolivarian Republic of) | 8993.65(7251.90,10931.98) | 95.78(77.57,116.19) | 62271.03(45106.15,87562.46) | 206.73(151.24,289.69) | 592.39(431.55,800.99) | 115.84(67.34,179.64) | 2.20(1.80,2.61) |
| Viet Nam | 73982.71(55001.41,98693.22) | 188.08(140.71,247.68) | 199250.72(143465.35,256308.02) | 208.09(152.58,267.40) | 169.32(92.13,258.50) | 10.64(-21.87,45.98) | 0.55(0.43,0.67) |
| Yemen | 4687.92(3073.02,8242.13) | 97.86(65.16,178.92) | 12922.13(8756.11,20311.48) | 95.71(65.15,147.63) | 175.65(94.45,301.43) | -2.19(-30.78,41.41) | -0.19(-0.31,-0.08) |
| Zambia | 6620.61(4976.19,8809.87) | 256.74(195.51,337.46) | 18666.82(13008.60,27452.47) | 298.41(215.11,424.70) | 181.95(97.16,343.86) | 16.23(-16.19,69.22) | 0.13(-0.04,0.29) |
| Zimbabwe | 3359.11(2483.74,4538.10) | 88.67(66.00,119.13) | 8533.47(5985.24,11691.42) | 131.14(93.52,178.41) | 154.04(95.06,218.98) | 47.90(13.41,84.89) | 1.50(1.11,1.89) |


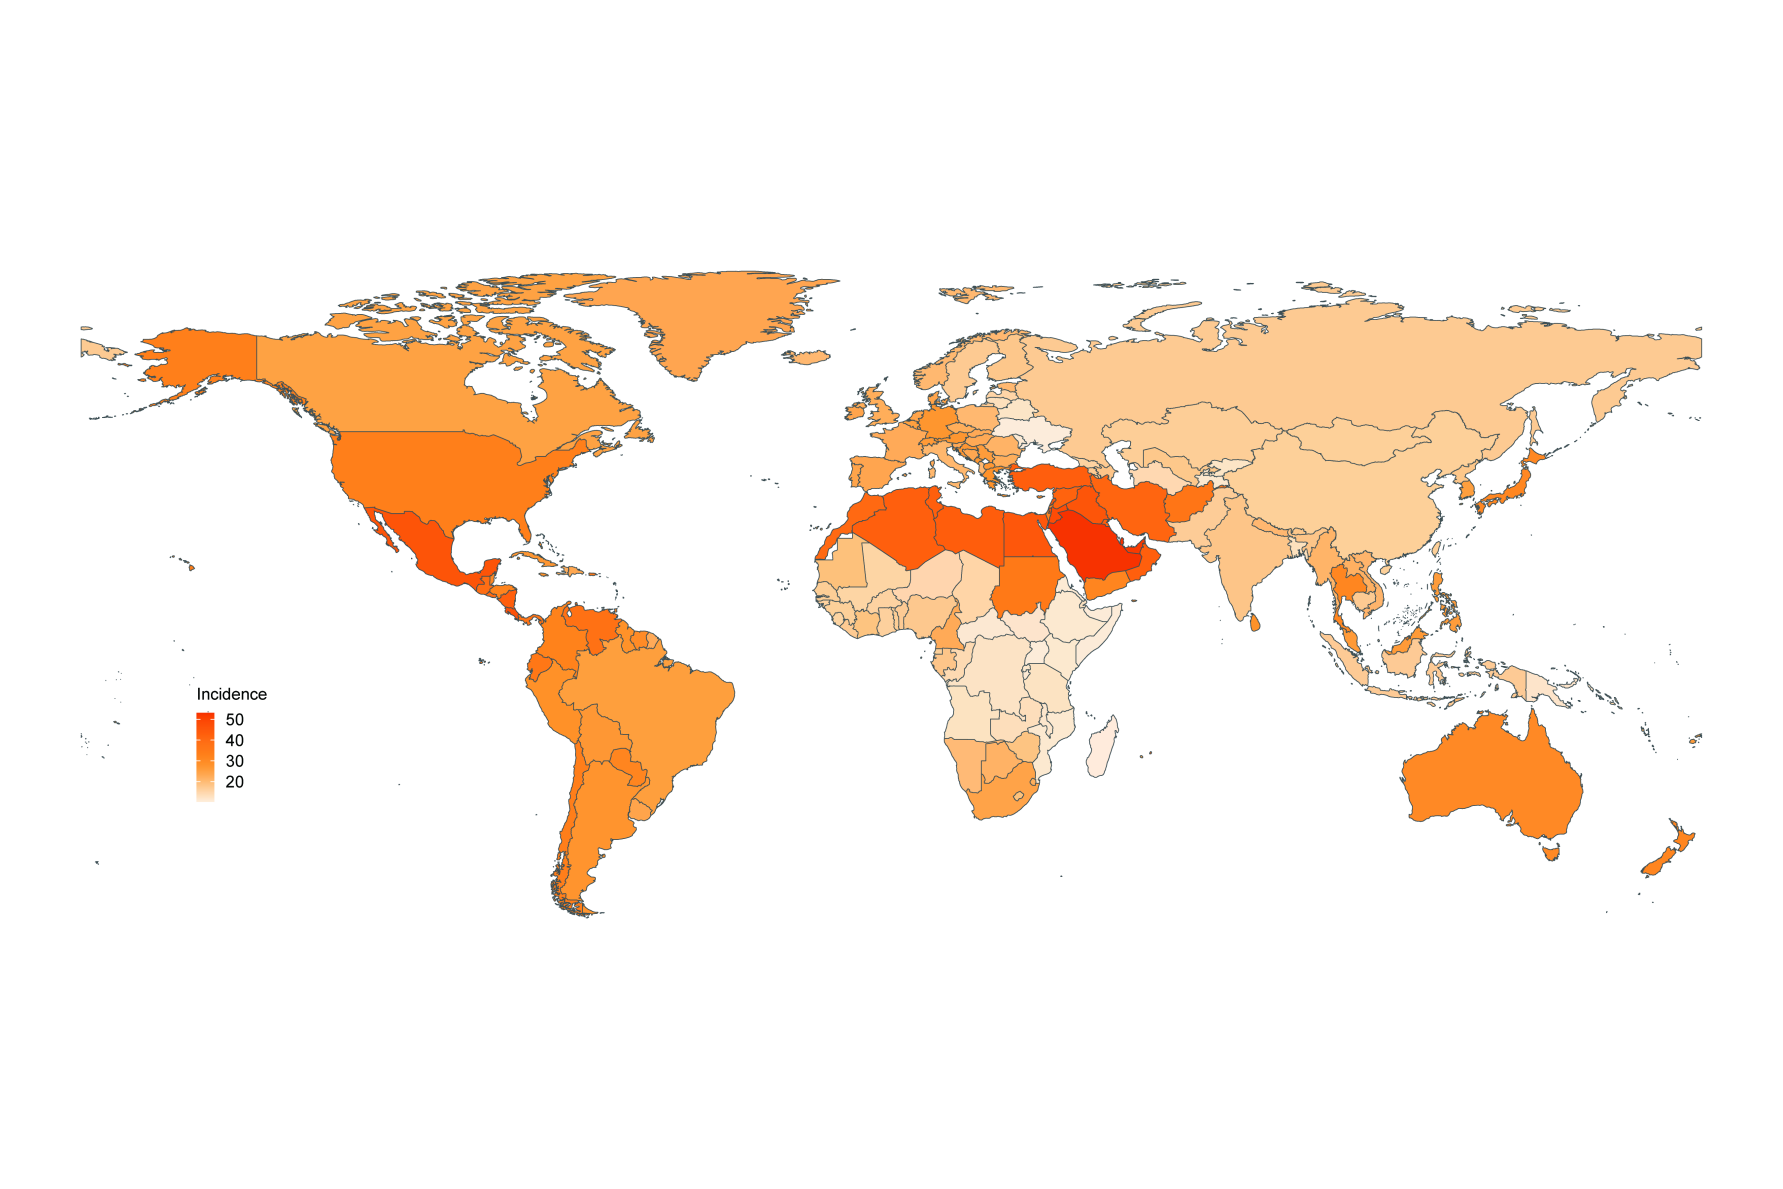


**Figure S1. Prevalence of Chronic kidney disease due to diabetes mellitus type 2 in 2021 at 204 Countries and Territories.**


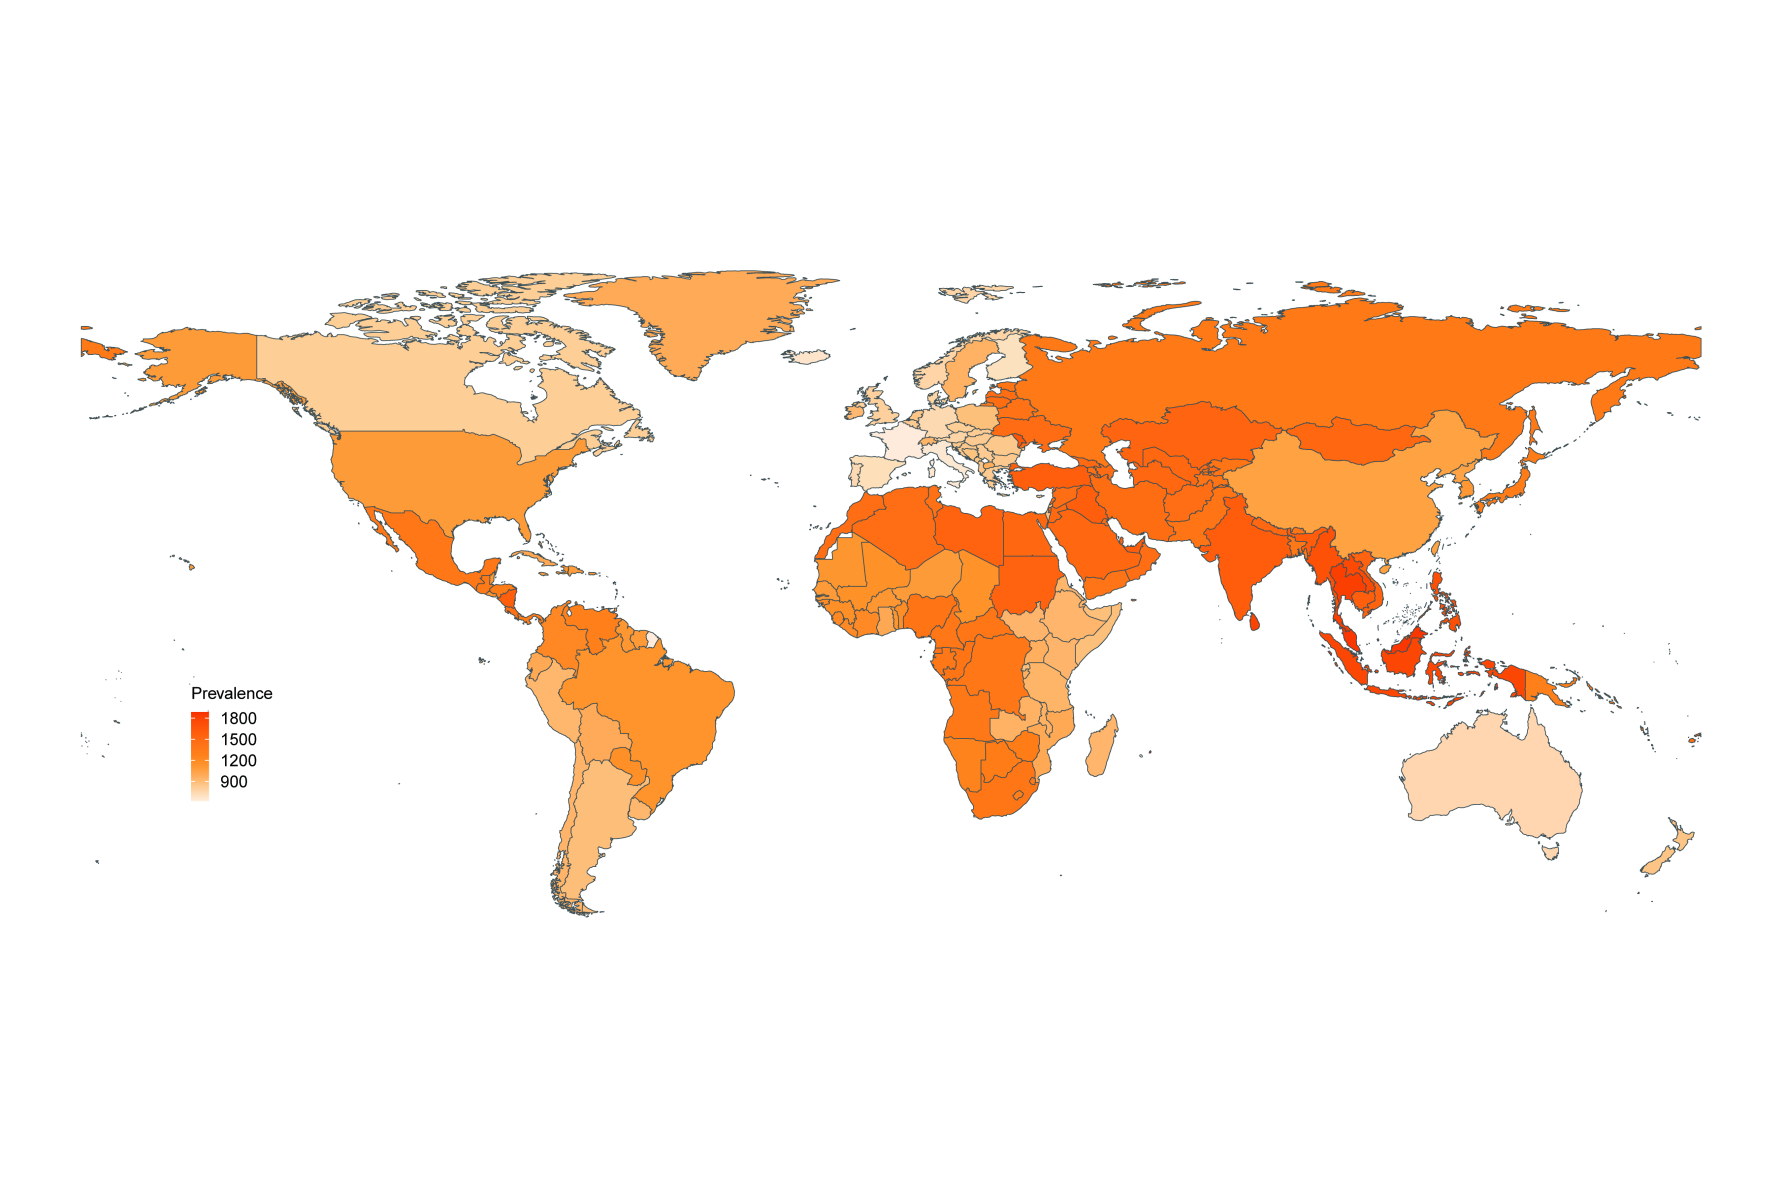


**Figure S2. Incidence of Chronic kidney disease due to diabetes mellitus type 2 in 2021 at 204 Countries and Territories.**


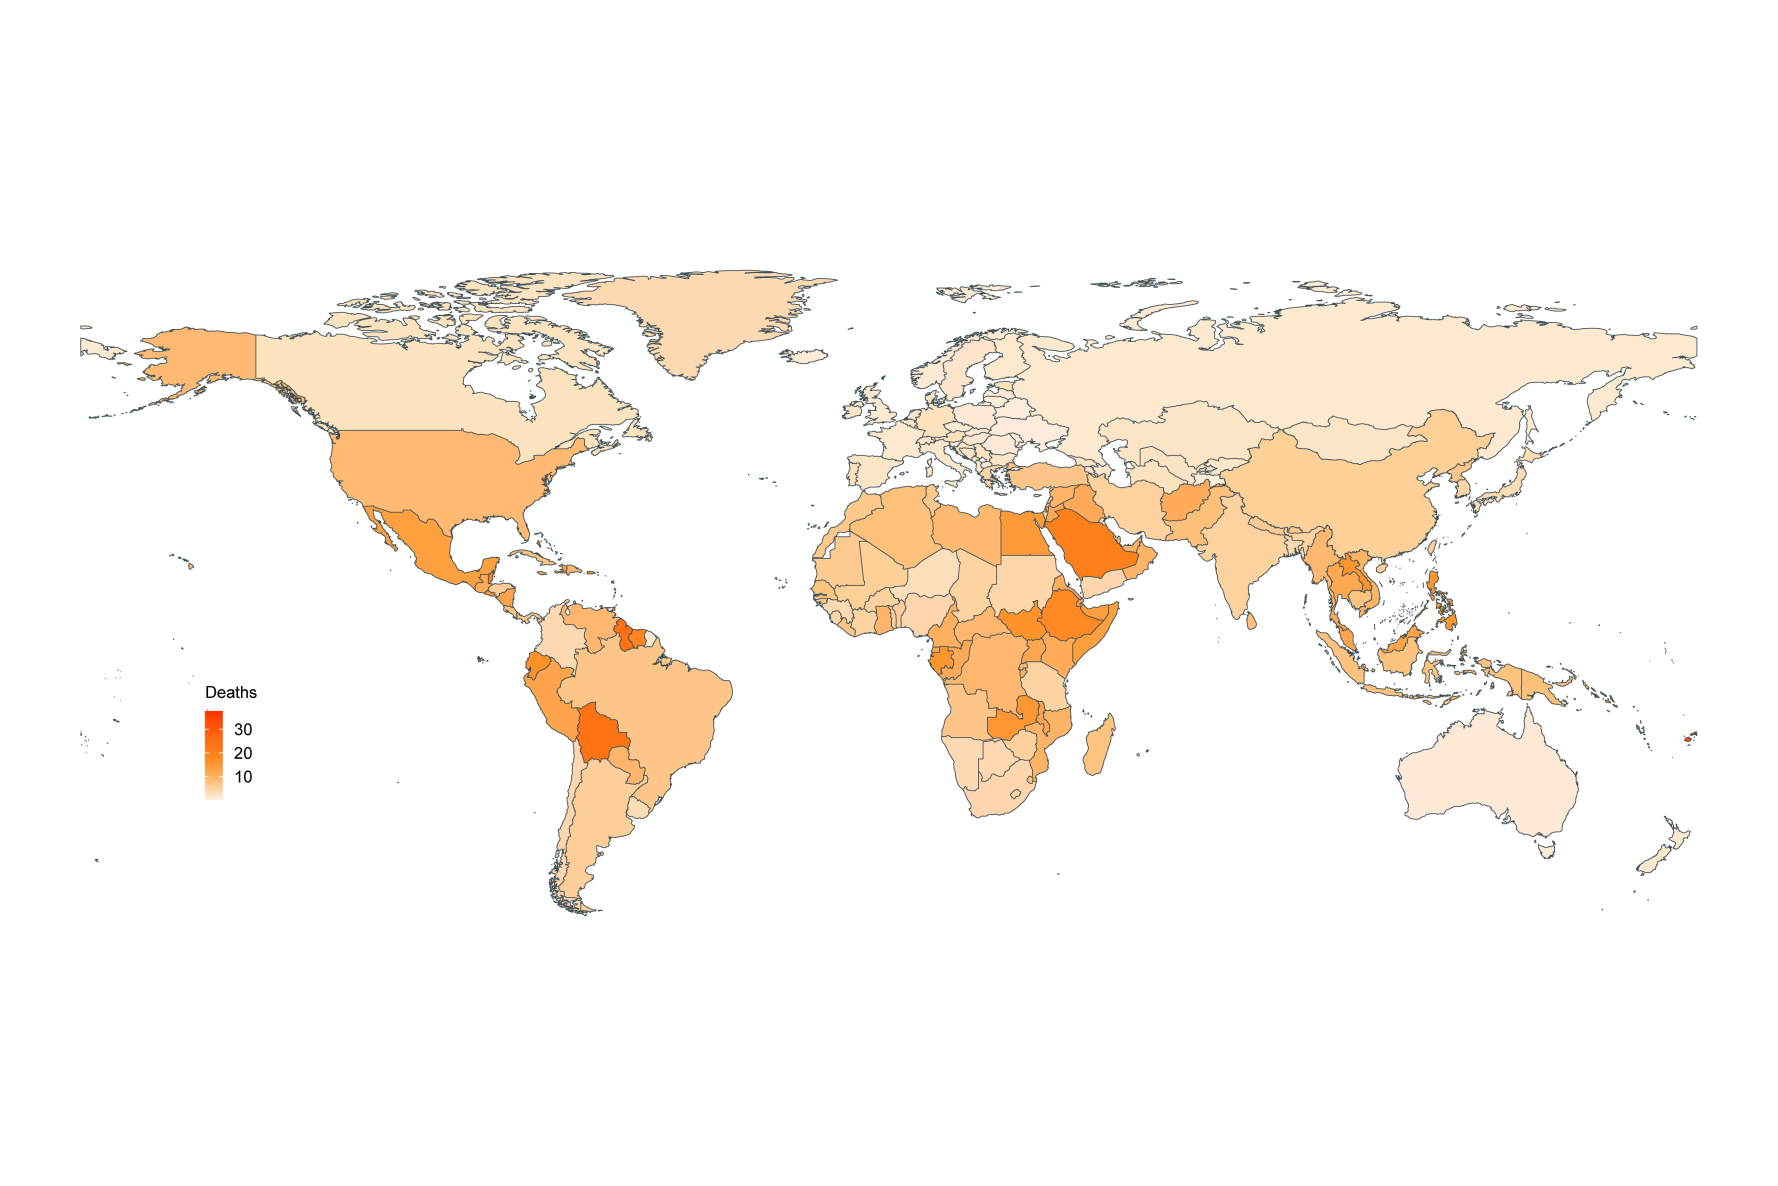


**Figure S3. Mortality of Chronic kidney disease due to diabetes mellitus type 2 in 2021 at 204 Countries and Territories.**


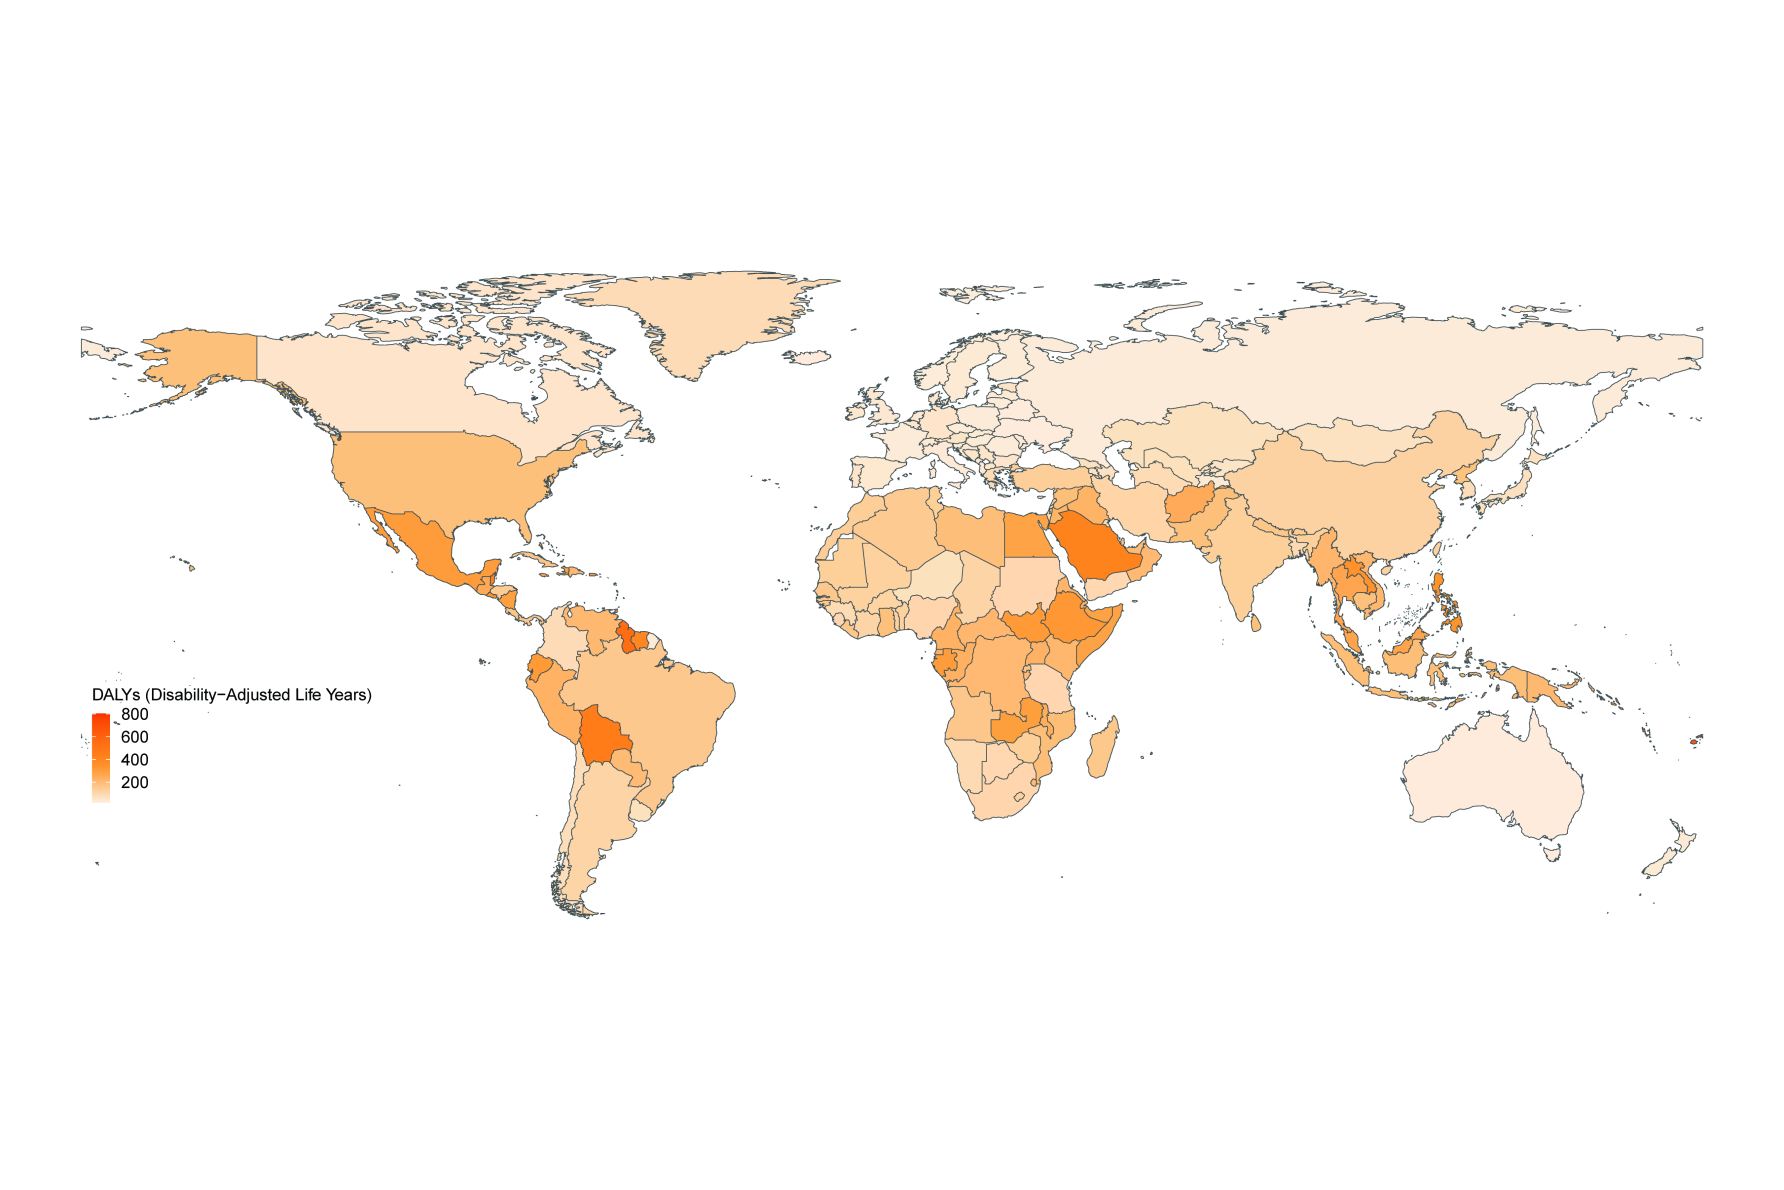


**Figure S4. DALYs of Chronic kidney disease due to diabetes mellitus type 2 in 2021 at 204 Countries and Territories.**
